# Supplementary material for: Superhydrophilic nanocomposite adsorbents modified via nitrogen-rich phosphonate-functionalized ionic liquid linkers: enhanced phosphopeptide enrichment and phosphoproteome analysis of tau phosphorylation in the hippocampal lysate of Alzheimer's transgenic mice
Source: Royal Society of Chemistry journal article supplement (doi:10.1039/d2tb01508k), 2022-01-01
Supplement: d2tb01508k1.pdf [file d2tb01508k1.pdf]

## Electronic Supplementary Information

### **Superhydrophilic Nanocomposite Adsorbent Modified via Nitrogen-rich Phosphonate-functionalized Ionic Liquid Linker: Enhanced Phosphopeptide Enrichment and Phosphoproteome Analysis of Tau Phosphorylation in Hippocampal Lysate of Alzheimer's Transgenic Mice**

Chenglong Xia,<sup>1</sup> Qiyao Wang,<sup>2</sup> Weida Liang,<sup>1</sup> Binbin Wang,<sup>1</sup> Quanshou Feng,<sup>1</sup> Chenyang Zhou,<sup>1</sup> Yishan Xie,<sup>1</sup> Yinghua Yan,<sup>1</sup> Lingling Zhao,<sup>1</sup> Bo Jiang,<sup>3</sup> Wei Cui,<sup>2,\*</sup> Hongze Liang<sup>1,\*</sup>

<sup>1</sup>Key Laboratory of Advanced Mass Spectrometry and Molecular Analysis of Zhejiang Province, School of Materials Science and Chemical Engineering, Ningbo University, Ningbo 315211, China

<sup>2</sup>Ningbo Key Laboratory of Behavior Neuroscience, Zhejiang Province Key Laboratory of Pathophysiology, School of Medicine, Ningbo University, Ningbo 315211, China

<sup>3</sup>CAS Key Laboratory of Separation Science for Analytical Chemistry, National Chromatographic Research and Analysis Center, Dalian Institute of Chemical Physics, Chinese Academy of Science, Dalian, Liaoning 116023, P.R. China

E-mail addresses:

[lianghongze@nbu.edu.cn](mailto:lianghongze@nbu.edu.cn)

[cuiwei@nbu.edu.cn](mailto:cuiwei@nbu.edu.cn)

## Contents

|                                                |     |
|------------------------------------------------|-----|
| Chemicals and Materials.....                   | 3   |
| Characterization and Measurement.....          | 4   |
| MALDI-TOF MS Analysis.....                     | 5   |
| Label-free quantitative phosphoproteomics..... | 5   |
| Figures S1-S8.....                             | 7   |
| Tables S1-S9.....                              | 13  |
| References.....                                | 116 |

## Chemicals and Materials.

All reagents are from commercial sources and no further purification is required. Graphene was purchased from Nanjing XFNANO Materials Tech Co., Ltd. Tetraethyl orthosilicate (TEOS), sodium hydroxide, titanium sulfate ( $\text{Ti}(\text{SO}_4)_2$ ), Gallium chloride ( $\text{GaCl}_3$ ), acetonitrile (ACN) and ammonia solution (25-28 wt%) were purchased from Sinopharm Chemical Reagent Co., Ltd. Polyethyleneimine (PEI,  $M_w = 70$  kDa, 50 wt% in  $\text{H}_2\text{O}$ ) was purchased from Aladdin Chemical Reagent (Shanghai, China). 3-chloropropyl triethoxysilane (CPTES) was purchased from Adamas-beta. Cetyltrimethylammonium bromide (CTAB) was obtained from Beijing Solarbio Science & Technology. 1,3-dibromopropane was obtained from HWRK Chem. Triethyl phosphite was purchased from Chengdu Gracia Chemical Technology. Hydrobromic acid (48 wt%) was obtained from J&K Chemical. Pyridoxal 5'-phosphate was obtained from Shanghai Yuanye Biotechnology. Trifluoroacetic acid was purchased from Aladdin.  $\beta$ -casein, bovine serum albumin (BSA), iodoacetamide (IAA), dithiothreitol (DTT) and 2,5-dihydroxybenzoic (DHB) were all obtained from Sigma Aldrich. Human serum and human blood were acquired from Ningbo University Hospital follow standard clinical procedures. Deionized water was produced by a Milli-Q apparatus (Millipore, Bedford, USA).

Collections of human serum, saliva, blood and CSF samples from healthy volunteers were conducted according to the protocol approved by Ningbo University Ethical Board. Use and care of laboratory animals followed the National Institutes of Health (NIH) Guide (NIH Publications No. 8023, revised 1978) and were authorized

by the Animal Care and Use Committee of Ningbo University. APP/PS1 and tau P301S transgenic mice and their wildtype littermates were purchased from GemPharmatech Company (Nanjing, Jiangsu, China). Mice were raised with a 12-h light/dark cycle (humidity:  $50 \pm 10\%$ , temperature:  $22 \pm 2$  °C).

### **Characterization and Measurement.**

Fourier-transform infrared (FT-IR) spectra were obtained on a NICOLET 6700 Fourier transform infrared spectrometer (Thermo Scientific, USA). Zeta potential was measured on a Zetasizer Nano ZS90 analyzer (Malvern, UK). Thermogravimetric analysis (TG) was obtained on the Q500 Thermogravimetric analyzer (TA, USA). Water contact angles were measured on a Dataphysics OCA25. The adsorption/desorption isotherms of nitrogen were measured at 77K by an ASAP2020 analyzer (Micromeritics, USA). Inductively coupled plasma optical emission spectroscopy (ICP-OES) was analyzed on an Agilent 5110 (Agilent, USA). The X-ray photoelectron spectroscopy (XPS) was obtained by Thermo's K-Alpha spectrometer (Thermo Science, USA). Scanning electron microscopy (SEM) images and energy dispersive X-ray analysis (EDX) were obtained by a Nova NanoSEM 450 electron microscope (FEI, USA). Transmission electron microscopy (TEM) images are presented on a Tecnai F20 electron microscope (FEI, USA). The results of MALDI-TOF-MS analysis were given at a 5800 Proteomics Analyzer (Applied Biosystems, USA) with a Nd-YAG laser at 355 nm.

### **MALDI-TOF MS Analysis.**

0.5  $\mu\text{L}$  of eluent and 0.5  $\mu\text{L}$  of DHB solution (20 mg  $\text{mL}^{-1}$ , 50% ACN/ 49%  $\text{H}_2\text{O}$ / 1%  $\text{H}_3\text{PO}_4$ , v/v/v) was mixed completely. The mixed solution was dropped upon the plate and dried, and analyzed by MALDI-TOF MS. MALDI-TOF spectrometer autoflex maX (Bruker Scientific, USA) was used in positive ion mode with an Nd:YAG laser (383 nm). The acceleration voltage was run at 20 kV, and the repetition rate was 1000 Hz.

### **Label-free quantitative phosphoproteomics.**

LC-MS/MS analysis was analyzed on an EASY-nLC 1200 system (Thermo Scientific, USA) coupled with Orbitrap Fusion Lumos mass spectrometer (Thermo Finnigan, San Jose, USA) with nanoelectrospray ion source. Phosphopeptides of mice brain lysate were redissolved in 0.1% TFA (20  $\mu\text{L}$ ), loaded on a trap column (100  $\mu\text{m}\times 2$  cm, 5  $\mu\text{m}$ , 100  $\text{\AA}$ , C18, Thermo Scientific, USA), and eluted and separated through an analytical column (75  $\mu\text{m}\times 100$  cm, 5  $\mu\text{m}$ , 100  $\text{\AA}$ , C18, Thermo Scientific) with mobile phase A (2% acetonitrile with 0.1% formic acid) and mobile phase B (90% acetonitrile with 0.1% formic acid) for 60 min. Elution gradient was set as follows: 0–40 min, 5–28% B; 40–42 min, 28–90% B; 42–60 min, 90% B. The flow rate was 250 nL/min. The mass spectrometer was run in positive mode. Full-scan MS spectra ( $m/z$  350–1600) were acquired in Orbitrap with a resolution of 60,000 at  $m/z$  200.  $\text{MS}^2$  spectra were obtained with a resolution of 15,000 at  $m/z$  200.

Raw data were analyzed with MaxQuant 2.0.5.0. The database was uniprot\_mice\_88108\_20210914.fasta. Search parameters were set as follows: Variable modifications, oxidation (M), acetyl (N-term), phospho (STY); Fixed modification, carbamidomethylation (C); Digestion mode, trypsin; Maximum missed cleavages, 2; Main search ppm, 6; PSM FDR, 0.01; Protein FDR, 0.01; Min peptide length, 2; FTMS MS/MS tolerance, 20 ppm; FTMS top peaks per 100 Da, 12.

Figures S1-S8

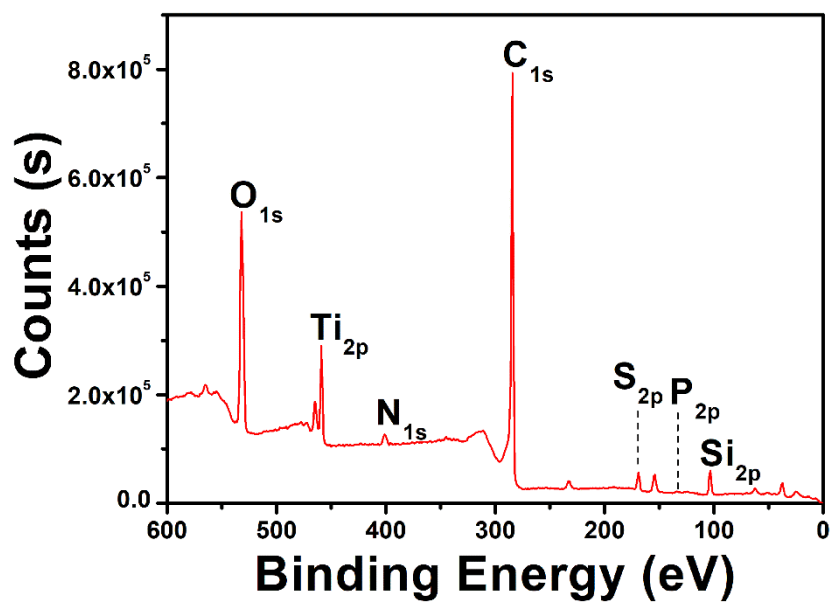

Figure S1. XPS of G@mSiO<sub>2</sub>@PEI-PFIL-Ti<sup>4+</sup>

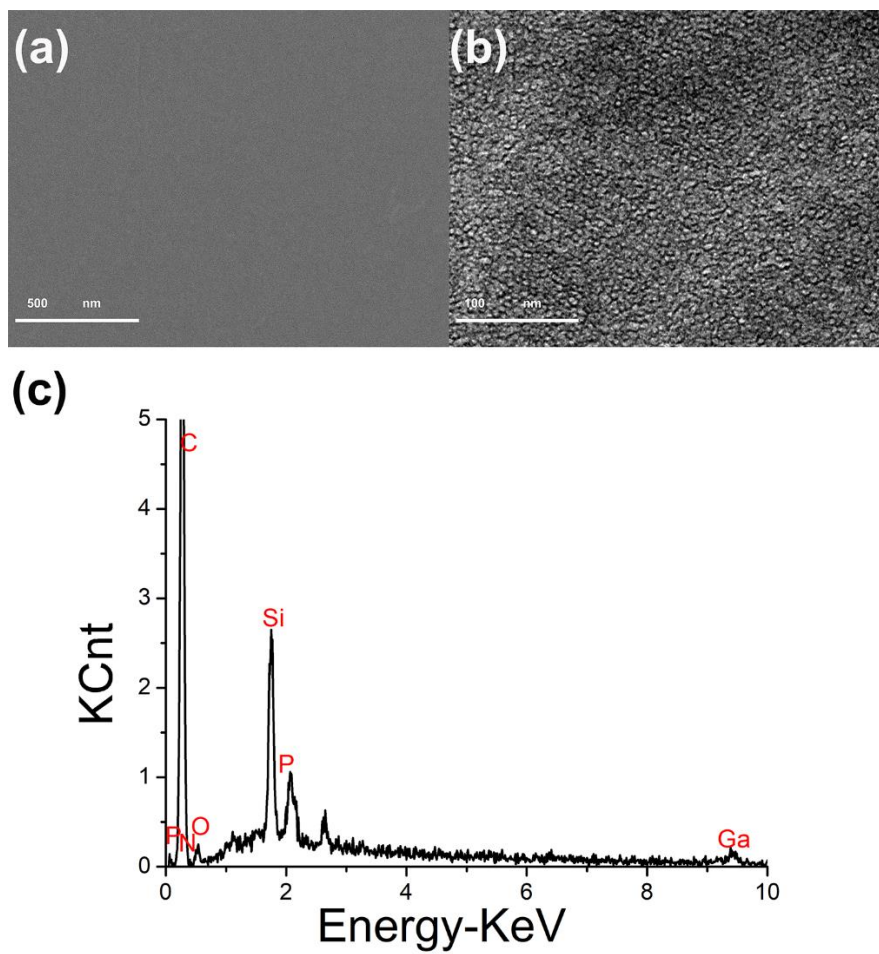

**Figure S2.** (a) SEM, (b) TEM, (c) EDX of the  $G@mSiO_2@PEI-PFIL-Ga^{3+}$ .



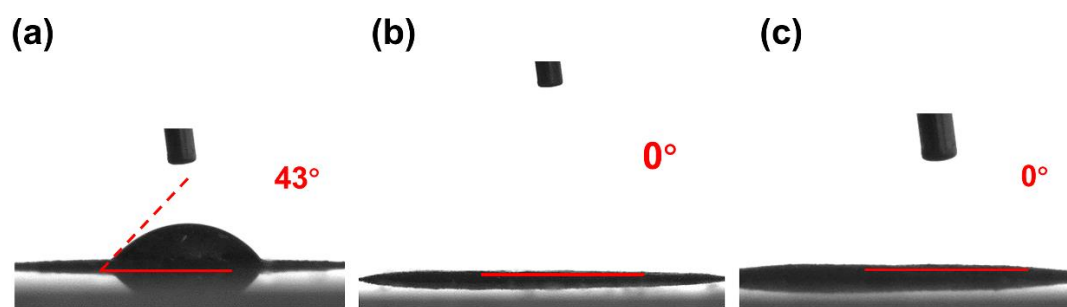

**Figure S3.** (a) water contact angle of G@mSiO<sub>2</sub>-CP, (b) G@mSiO<sub>2</sub>@PEI, (c) G@mSiO<sub>2</sub>@PEI-PFIL-Ga<sup>3+</sup>.

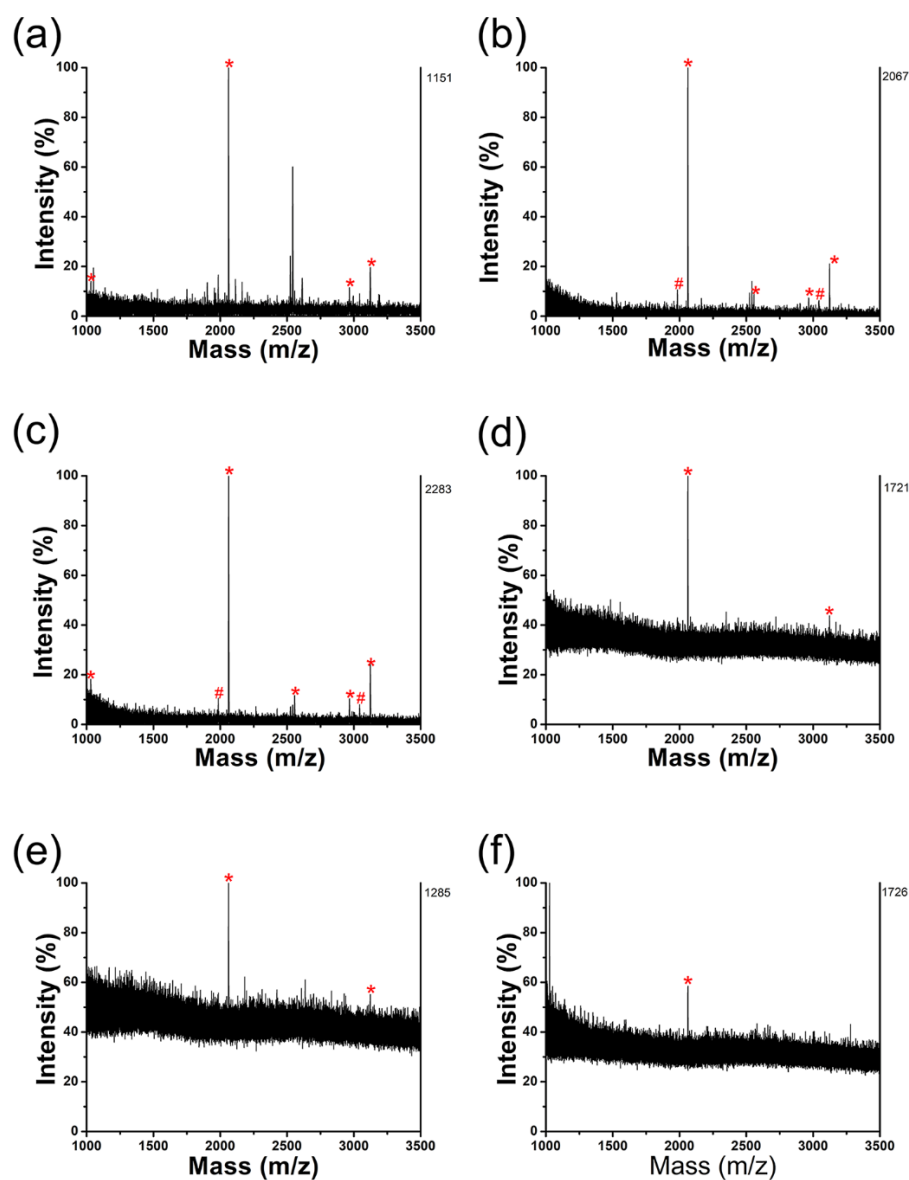

**Figure S4.** The MALDI-TOF MS spectra of tryptic digest mixture of  $\beta$ -casein and BSA (1:500, molar ratio) with different loading buffers containing 50% ACN and (a) 0.5% TFA, (b) 1% TFA, (c) 2% TFA, (d) 3% TFA, (e) 4% TFA and (f) 5% TFA. The peaks of phosphopeptides are marked with \*, and the peaks of dephosphopeptides are marked with #. Elution buffer,  $\text{NH}_4\text{OH}$  solution (10 v%).

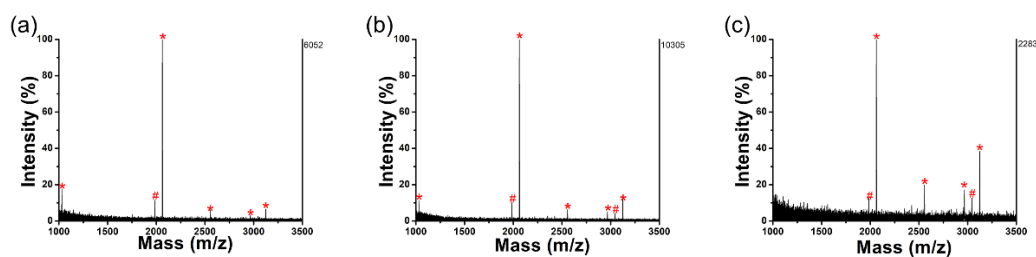

**Figure S5.** The MALDI-TOF MS spectra of tryptic digest mixture of  $\beta$ -casein and BSA (1:500, molar ratio) with different elution buffers of  $\text{NH}_4\text{OH}$  concentrations diluted with deionized water (a) 3 v%, (b) 5 v% and (c) 10 v%. The peaks of phosphopeptides are marked with \*, and the peaks of dephosphopeptides are marked with #. Loading buffer, 50% ACN, 2% TFA, v/v).

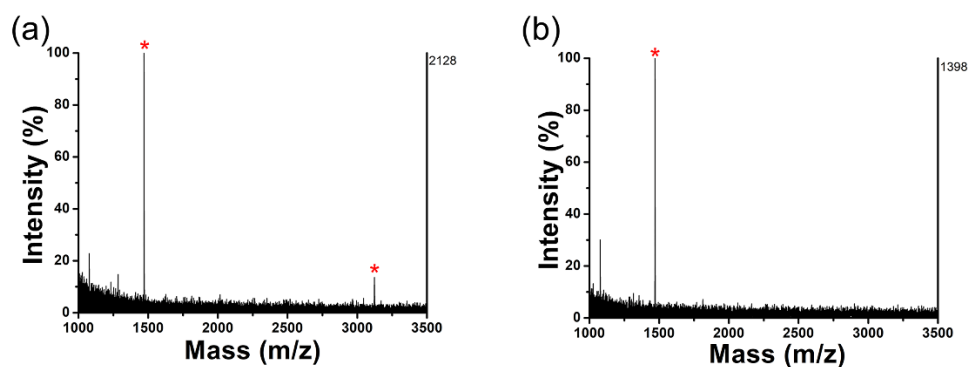

**Figure S6.** MALDI-TOF MS spectra of  $\beta$ -casein tryptic digest (a) 100 fmol, (b) 10 fmol after enrichment by  $\text{G@mSiO}_2\text{@PEI-PFIL-Ga}^{3+}$  nanocomposite. The peaks of phosphopeptides are marked with \*, and the peaks of dephosphopeptides are marked with #.

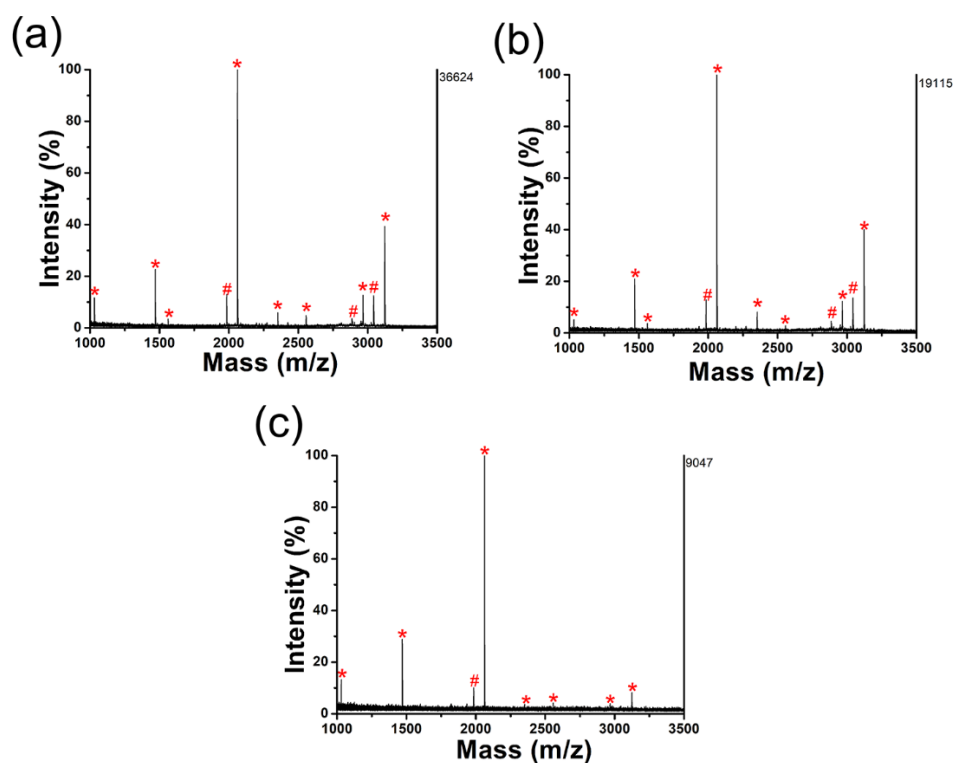

**Figure S7.** MALDI-TOF mass spectra of  $\beta$ -casein trypsin digestion (2 pmol) of  $G@mSiO_2@PEI-PFIL-Ti^{4+}$  nanocomposites after (a) 1, (b) 5, and (c) 10 times enrichment.

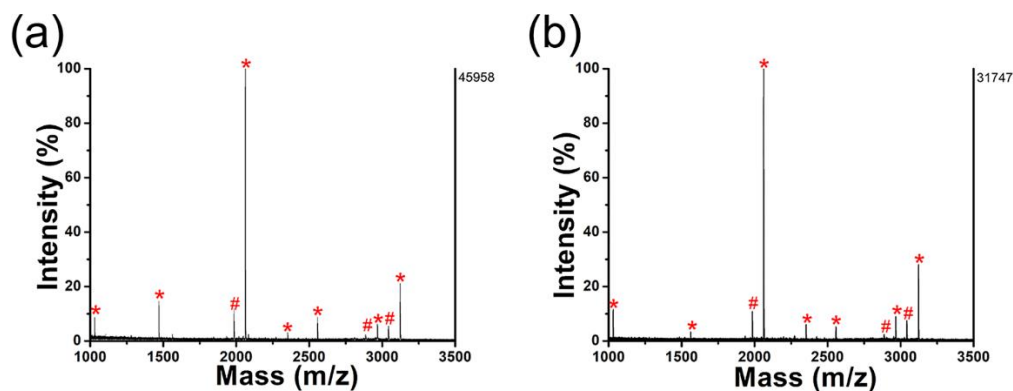

**Figure S8.** MALDI-TOF MS spectra of  $\beta$ -casein tryptic digest after enrichment by different batches  $G@mSiO_2@PEI-PFIL-Ti^{4+}$  nanocomposite (a) batch I and (b) batch II. The peaks of phosphopeptides are marked with \*, and the peaks of dephosphopeptides are marked with #.

**Tables S1–S9**

**Table S1.** The detailed information of phosphopeptides from  $\beta$ -casein digests enriched by G@mSiO<sub>2</sub>@PEI-PFIL-Ti<sup>4+</sup>.

| NO. | m/z  | Peptide Sequence                      | Phosphorylation Site |
|-----|------|---------------------------------------|----------------------|
| 1   | 1031 | FQ[pS]EEQQQTEDELQDK                   | 1                    |
| 2   | 1154 | [pS][pS]EEKFLR                        | 2                    |
| 3   | 1279 | FQ[pS]EEQQQTEDELQDKIHPF               | 1                    |
| 4   | 1561 | RELEELNVPGEIVESL[pS][pS][pS]EE[pS]ITR | 4                    |
| 5   | 2061 | FQ[pS]EEQQQTEDELQDK                   | 1                    |
| 6   | 2352 | NVPGEIVE[pS]L[pS][pS][pS]EESITR       | 4                    |
| 7   | 2556 | FQ[pS]EEQQQTEDELQDKIHPF               | 1                    |
| 8   | 2966 | ELEELNVPGEIVE[pS]L[pS][pS][pS]EESITR  | 4                    |
| 9   | 3123 | RELEELNVPGEIVE[pS]L[pS][pS][pS]EESITR | 4                    |

**Table S2.** Comparison with the enrichment performance of some other affinity materials based on IMAC methods reported in recent years.

| Affinity Materials                                                                        | Sensitivity ( $\beta$ -casein ) | Selectivity $\beta$ -casein /BSA (molar ratio) | The Number of Phosphopeptides from Saliva | Ref             |
|-------------------------------------------------------------------------------------------|---------------------------------|------------------------------------------------|-------------------------------------------|-----------------|
| Fe <sub>3</sub> O <sub>4</sub> @PDA@mTiO <sub>2</sub> @PEI-g-ZIF-8                        | 2 fmol                          | 1:1000                                         | 16                                        | 1               |
| mCNT@PDA@PEI-ZIF-8                                                                        | 0.5 fmol                        | 1:2000                                         | 20                                        | 2               |
| Ti <sup>4+</sup> -MGMSs                                                                   | 0.5 fmol/ $\mu$ L               | 1:500                                          | 14                                        | 3               |
| MG@mSiO <sub>2</sub> -ATP-Ti <sup>4+</sup>                                                | 4 fmol                          | 1:1000                                         | 19                                        | 4               |
| magG@PDA-Hf <sup>4+</sup>                                                                 | 0.08 fmol                       | 1:500                                          | -                                         | 5               |
| Fe <sub>3</sub> O <sub>4</sub> @ILI-01@Ti <sup>4+</sup>                                   | 0.5 fmol                        | 1:5000                                         | 16                                        | 6               |
| CTSM@AMPA-Ti <sup>4+</sup>                                                                | 0.4 fmol                        | 1:1000                                         | 35                                        | 7               |
| Fe <sub>3</sub> O <sub>4</sub> @mPDA@Ti <sup>4+</sup>                                     | 0.1 fmol/ $\mu$ L               | 1:200                                          | 38                                        | 8               |
| MagSiO <sub>2</sub> @SiO <sub>2</sub> @PDA@Ti                                             | 50 fmol/mL                      | 1:500                                          | -                                         | 9               |
| TpPa-2-Ti <sup>4+</sup>                                                                   | 4 fmol                          | 1:100                                          | -                                         | 10              |
| Fe <sub>3</sub> O <sub>4</sub> @SiO <sub>2</sub> @Ce-Zr-MOF@PA                            | 0.1 fmol/ $\mu$ L               | 1:800                                          | 15                                        | 11              |
| G@mSiO <sub>2</sub> -PFIL-Ti <sup>4+</sup>                                                | 0.15 fmol                       | 1:10000                                        | 23                                        | 12              |
| Fe <sub>3</sub> O <sub>4</sub> @mSiO <sub>2</sub> @APA@Ti <sup>4+</sup> /Nb <sup>5+</sup> | 0.05 fmol                       | 1:1500                                         | 24                                        | 13              |
| MCNC@COF@Zr <sup>4+</sup>                                                                 | 10 fmol                         | 1:200                                          | -                                         | 14              |
| (4 $\mu$ -PEO-Ti <sup>4+</sup> )                                                          | 2 fmol                          | 1:1000                                         | 15                                        | 15              |
| Fe <sub>3</sub> O <sub>4</sub> @PDA@PMAA@PAMAM                                            | 1 fmol/ $\mu$ L                 | 1:500                                          | 17                                        | 16              |
| Fe <sub>3</sub> O <sub>4</sub> @mSiO <sub>2</sub> -Ti <sup>4+</sup>                       | 0.1 fmol/ $\mu$ L               | -                                              | 13                                        | 17              |
| Ti <sup>4+</sup> -IMAC HPHM                                                               | 5 fmol                          | 1:1000                                         | -                                         | 18              |
| <b>G@mSiO<sub>2</sub>@PEI-PFIL-Ti<sup>4+</sup></b>                                        | <b>0.1 fmol</b>                 | <b>1:12000</b>                                 | <b>27</b>                                 | <b>Our work</b> |

**Table S3.** The change of atomic content for G@mSiO<sub>2</sub>@PEI-PFIL-Ti<sup>4+</sup> nanocomposite after the 0th and the 10th time of phosphopeptides enrichment.

|      | 0th time (At %) | 10th time (At %) |
|------|-----------------|------------------|
| C1s  | 90.75           | 94.42            |
| N1s  | 2.92            | 3.20             |
| P2p  | 0.73            | 0.64             |
| Ti2p | 5.60            | 1.74             |

**Table S4.** The detailed information of endogenous phosphopeptides enriched from human serum.

| No. | m/z  | Peptide Sequence    | Phosphorylation Site |
|-----|------|---------------------|----------------------|
| 1   | 1390 | D[pS]GEGDFLAEGGGV   | 1                    |
| 2   | 1459 | AD[pS]GEGDFLAEGGGV  | 1                    |
| 3   | 1545 | D[pS]GEGDFLAEGGGVR  | 1                    |
| 4   | 1616 | AD[pS]GEGDFLAEGGGVR | 1                    |

**Table S5.** Detailed information on phosphopeptides enriched from human saliva by G@mSiO<sub>2</sub>@PEI-PFIL-Ti<sup>4+</sup> nanocomposites.

| No. | m/z  | Sequence        | Phosphorylation Site | Ref |
|-----|------|-----------------|----------------------|-----|
| 1   | 819  | DGyMPR          | 1                    | 19  |
| 2   | 886  | KLsEATR         | 1                    | 19  |
| 3   | 934  | RFsLFGK         | 1                    | 20  |
| 4   | 951  | ILsNNPSK        | 1                    | 20  |
| 5   | 1001 | ssEEKFL         | 2                    | 21  |
| 6   | 1022 | ItFYEDR         | 1                    | 20  |
| 7   | 1076 | SsEEKFLR        | 1                    | 22  |
| 8   | 1104 | WDSWTsSR        | 1                    | 23  |
| 9   | 1115 | tDsDEKFI        | 2                    | 21  |
| 10  | 1142 | WPsPKEEDR       | 1                    | 24  |
| 11  | 1155 | ssEEKFLR        | 2                    | 21  |
| 12  | 1172 | SPEQEEtASL      | 1                    | 21  |
| 13  | 1192 | DsSEEKFLR       | 1                    | 21  |
| 14  | 1234 | sEQFLDEER       | 1                    | 21  |
| 15  | 1270 | D[pS][pS]EEKFLR | 2                    | 24  |
| 16  | 1311 | ssEEKFLRR       | 2                    | 21  |



---

|    |      |                           |   |    |
|----|------|---------------------------|---|----|
| 17 | 1347 | DSsEEKFLRR                | 1 | 21 |
| 18 | 1426 | DssEEKFLRR                | 2 | 21 |
| 19 | 1461 | GGDsEQFLDEER              | 1 | 21 |
| 20 | 1481 | ssEEKFLRRIG               | 2 | 21 |
| 21 | 1539 | ScclIPQTVsHR              | 3 | 20 |
| 22 | 1597 | DssEEKFLRRIG              | 2 | 21 |
| 23 | 1637 | ssEEKFLRRIGR              | 2 | 21 |
| 24 | 1752 | QPQITPNPVtQHVQS           | 1 | 24 |
| 25 | 1784 | ISDGGDsEQFIDEER           | 1 | 3  |
| 26 | 1899 | QPGPAGPPGFsRmGKAGPP       | 2 | 22 |
| 27 | 2722 | GGDsEQFIDEERQGPPLGGQQSQPS | 1 | 21 |

---

**Table S6.** The phosphopeptides obtained from the tryptic digest of mice brain lysate enriched by G@mSiO<sub>2</sub>@PEI-PFIL-Ti<sup>4+</sup> nanocomposites.

| Protein IDs | Phospho (STY) Probabilities                                                 | Mass      |
|-------------|-----------------------------------------------------------------------------|-----------|
| Q3UVL4      | AAAAAVGPGLGSGPGDS(1)PEGPEADAPER                                             | 2502.1623 |
| Q3UVL4      | AAAAAVGPGLGS(0.65)GPGDS(0.35)PEGPEADAPERR                                   | 2658.2634 |
| Q9CY29      | AAAASAAEAGIAT(0.996)PGT(0.004)EDSDDALLK                                     | 2315.1129 |
| A0A140LJ68  | AAAEAANCIMEVEDLT(0.988)FT(0.529)S(0.483)PFCLQ<br>VK                         | 2914.3551 |
| A0A087WRM2  | AAASGPASASAPAAEILLT(1)PAR                                                   | 1992.064  |
| B2RX11      | AAAS(0.012)PS(0.24)S(0.749)PR                                               | 842.42463 |
| A9UGK3      | AAATADPGAGNPQAGDS(0.001)S(0.001)GGDS(0.019)G<br>GGLPS(0.978)PGEQELS(0.001)R | 3237.4406 |
| P28667      | AAAT(1)PES(1)QEPQAK                                                         | 1326.6416 |
| D3Z183      | VAILT(1)DDEEEQKR                                                            | 2044.9913 |
| Q9D2E2      | AADS(1)DDDVPVPTPSDGGVNK                                                     | 2051.9284 |
| B1AWE0      | AAEEAFVNDIDES(0.214)S(0.779)PGT(0.007)EWER                                  | 2351.019  |
| A2AJI1      | AAEEKEPAAPAS(0.956)PAPS(0.048)PVPS(0.503)PT(0.49<br>3)PAQPQK                | 2749.3923 |
| Q8BTI8      | AAETPAVASCWSGPQVS(1)PEHK                                                    | 2208.027  |
| Q5SXA5      | AAET(0.001)VPDLPS(0.998)PPT(0.001)EAPAPASNTSTR                              | 2476.2082 |
| Q5SS40      | AAFDDAIAELDT(0.016)LS(0.979)EES(0.005)YK                                    | 2086.9583 |
| A0A0A6YY91  | AAFS(1)KDES(1)K                                                             | 981.47673 |
| A0A0A6YY91  | AAFS(0.5)KDES(0.5)K                                                         | 981.47673 |
| A0A0A6YY91  | AAFS(1)KDES(1)KEPIVEVR                                                      | 1803.9367 |
| Q6A018      | AAGAVEAVCT(0.09)GHT(0.241)GKVS(0.669)PPPR                                   | 2061.0426 |
| Q8R554      | AAGGAAS(1)PGPGGAR                                                           | 1152.5636 |
| Q05BZ0      | AAGGGGGS(1)GEDEAQRS                                                         | 1404.5866 |
| A2A791      | AAHQES(1)DNENEIQIQQLK                                                       | 2208.0407 |
| Q569Z0      | AAILKAS(1)PK                                                                | 897.56475 |
| A0A286YDA2  | AAKES(1)EEEEEEETEELK                                                        | 2023.8229 |
| C6EQG9      | AALPAGEGGS(1)PEGAK                                                          | 1310.6466 |
| Q9R1L5      | AALS(1)PVQEHETGR                                                            | 1393.695  |
| Q3URG1      | AANKT(1)PPKS(1)PGDPAR                                                       | 1505.795  |
| Q2NKI4      | AAPALT(1)PPDR                                                               | 1007.54   |
| Q8R554      | AAPGT(0.001)GGPT(0.077)PGRS(0.922)PPAPAR                                    | 1713.8911 |
| Q3UL43      | AAPQS(0.929)PS(0.071)VPK                                                    | 980.5291  |
| Q9ESJ4      | AAPT(0.001)T(0.999)PPPPVK                                                   | 1074.6073 |
| O08614      | AAQAS(1)LNALNDPIAVEQALQEK                                                   | 2293.1914 |
| B1AQX6      | AAQGPAGS(1)PDKGK                                                            | 1182.5993 |
| D6RE47      | AAS(1)ALLRS(1)PR                                                            | 1153.6931 |
| Q3TBZ3      | AASAPAKES(1)PK                                                              | 1055.5611 |
| D3Z0D7      | AAS(1)DPNPAEPAR                                                             | 1194.5629 |
| P42128      | AASEQQADAS(0.006)GGDS(0.994)PK                                              | 1517.6594 |

|            |                                                            |           |
|------------|------------------------------------------------------------|-----------|
| Q8BQY0     | AASEVAGLGAGT(0.999)PS(0.981)PS(0.02)ES(0.001)SAL<br>CASK   | 2304.0904 |
| Q8BQY0     | AASEVAGLGAGT(1)PS(0.977)PS(0.023)ES(0.001)SALC<br>ASK      | 2304.0904 |
| Q8R2V4     | AAS(1)LTEDR                                                | 861.41921 |
| Q3UGC1     | AAS(1)PPASASDLIEQQQK                                       | 1739.869  |
| B0LAC6     | AAS(0.998)PS(0.002)KTEIQTIFK                               | 1519.8246 |
| A2A8V9     | AAS(1)PS(1)PQSVR                                           | 998.51451 |
| Q3UQU5     | AAS(0.98)S(0.02)ESSGDREK                                   | 1222.5426 |
| Q80U91     | AAS(0.963)T(0.037)DLGAGEAVVGK                              | 1344.6885 |
| A0A087WSE3 | AAS(1)VELPQR                                               | 969.52434 |
| H3BJL3     | AAT(1)PEEK                                                 | 744.36538 |
| A0A1L1SQ28 | AAVGS(0.998)PGS(0.002)LESAPR                               | 1297.6626 |
| A0A1L1SQ28 | AAVGS(0.999)PGSLES(0.001)APR                               | 1297.6626 |
| P27546     | AAVGVT(0.007)GNDIT(0.164)T(0.83)PPNKEPPPS(1)PEK<br>K       | 2543.3231 |
| Q8C1D8     | AAVLS(1)DS(1)EDDAGNASAK                                    | 1619.7275 |
| Q5FW97     | AAVPSGAS(0.001)T(0.004)GIY(0.995)EALELR                    | 1803.9367 |
| Q8K232     | AAVVT(0.014)S(0.985)PPPT(0.001)TAPHK                       | 1472.7987 |
| A0A1B0GQW2 | ADADAGPAGGT(0.003)APDS(0.997)PR                            | 1524.6805 |
| A0A0N4SUV3 | ADALQAGAS(0.927)QFES(0.039)S(0.035)AAK                     | 1650.7849 |
| Q8CHR4     | ADALQAGAS(1)QFETSAK                                        | 1664.8006 |
| Q8R0M4     | ADAPDAGAQS(0.939)DS(0.058)ELPS(0.003)Y(0.001)HQ<br>NDVSLDR | 2757.2114 |
| Q14C38     | ADEDKS(1)DAEGKPAR                                          | 1487.6852 |
| Q3UAY3     | ADEPS(1)PPAEKDEGGGK                                        | 1711.7537 |
| B9EHJ3     | ADGAT(0.47)S(0.53)DDLHLHDDR                                | 1614.6758 |
| O35295     | ADGDS(0.5)GS(0.5)ER                                        | 892.35225 |
| O35295     | ADGDS(1)GS(1)ER                                            | 892.35225 |
| A0A0N4SVM0 | ADLEEQLS(1)DEEK                                            | 1404.6256 |
| Q3U2G6     | ADLES(1)PQR                                                | 914.44576 |
| Q8C845     | ADLNQGIGEPQS(0.771)PS(0.229)R                              | 1567.759  |
| P68404     | ADPAAGPPPS(0.994)EGEES(0.003)T(0.003)VR                    | 1765.8119 |
| P60879     | ADQLADES(0.995)LES(0.003)T(0.003)R                         | 1433.6634 |
| Q3UNH4     | ADSAS(0.999)PS(0.001)PR                                    | 886.41446 |
| A0A494BAG5 | ADS(1)DGDLENDGAGDLR                                        | 1820.7297 |
| Q7TPM0     | ADS(0.998)DS(0.002)EDKGEESKPK                              | 1620.7115 |
| E9QN14     | ADS(1)EAS(0.289)S(0.711)GPLLDDK                            | 1403.6416 |
| Q3TQI7     | ADS(0.008)ES(0.992)EEDEQESEEV                              | 1866.7239 |
| A2ARP8     | ADS(1)KESLK                                                | 876.45526 |
| E9PV14     | ADS(1)S(1)DETDTSFAER                                       | 1529.6118 |
| E9PV14     | ADSS(1)DETDTS(1)FAER                                       | 1529.6118 |
| Q571D4     | ADSVAGAIQSDPAEGS(0.989)QES(0.011)HGR                       | 2167.973  |
| Q7TQ95     | ADS(1)VPNLEPSEESLVTK                                       | 1813.8945 |
| B2RRE3     | LDGES(1)DKEQFDDDDQK                                        | 2496.114  |

|            |                                                                                                      |           |
|------------|------------------------------------------------------------------------------------------------------|-----------|
| E9QNN1     | AEAENNSGVESGYGS(0.999)PGPT(0.001)WDR                                                                 | 2366.0047 |
| Q14C38     | AEDEGS(0.972)T(0.028)EEGGKADEDK                                                                      | 1765.7126 |
| Q14C38     | AEDEGS(0.5)T(0.5)EEGGKADEDK                                                                          | 1765.7126 |
| P26645     | AEDGAAPS(0.001)PS(0.075)S(0.821)ET(0.103)PK                                                          | 1442.6525 |
| P26645     | AEDGAAPS(0.964)PS(0.014)S(0.014)ET(0.008)PKK                                                         | 1570.7475 |
| Q925J6     | AEDS(0.993)S(0.007)EGHEEEVLGGR                                                                       | 1699.7285 |
| Q8K0I9     | AEEAASAS(0.007)ADGDPS(0.99)GEEEEPEVT(0.002)S(0.001)SDTGAPVSPLPK                                      | 3512.5438 |
| Q547J4     | AEEAGIGDT(1)PNQEDQAAGHVQTAR                                                                          | 2464.1215 |
| A0A5F8MPE1 | AEEAT(1)PVTALR                                                                                       | 1156.6088 |
| A0A5F8MPE1 | AEEAT(0.999)PVT(0.001)ALR                                                                            | 1156.6088 |
| Q5SUC3     | AEDEILNRS(1)PR                                                                                       | 1427.7005 |
| P08553     | AEEEGGS(1)EEEGS(1)DR                                                                                 | 1479.5597 |
| P08553     | AEEEGGSEEEGSDRS(1)PQESK                                                                              | 2135.8727 |
| Q8BGC0     | AEEGGES(1)EGDAS(1)EKDAK                                                                              | 1707.7071 |
| Q8BGC0     | AEEGGES(0.5)EGDAS(0.5)EKDAK                                                                          | 1707.7071 |
| Q8BGC0     | AEEGGES(0.999)EGDAS(0.001)EKDAK                                                                      | 1707.7071 |
| Q52KE7     | AEEKS(1)PVSINVK                                                                                      | 1299.7034 |
| A0A087WPL5 | AEENNS(0.001)GVES(0.003)S(0.003)GY(0.002)GS(0.964)PGPT(0.026)WDR                                     | 2294.9676 |
| Q8C916     | AEEQDLSEVELS(0.999)PVGS(0.001)EEPR                                                                   | 2199.0179 |
| E9Q0E9     | AEESGGS(0.004)S(0.128)S(0.739)PT(0.128)HDEN                                                          | 1502.5757 |
| Q9DCU2     | AEFPS(0.006)KVS(0.86)T(0.134)R                                                                       | 1120.5877 |
| Q543Y7     | AEGAT(0.002)LS(0.014)NAT(0.055)GAVES(0.214)T(0.231)S(0.246)QAGDRGS(0.338)VS(0.284)S(0.596)Y(0.021)DR | 2943.3442 |
| Q3UYK7     | AEKPSALNS(1)EEETHEQSTEQDK                                                                            | 2486.1045 |
| A2ARP8     | AELEEMEEVHPS(1)DEEEEETK                                                                              | 2387.9799 |
| Q9QYG0     | AELQEVQIT(0.134)EEKPLLPGQT(0.768)PET(0.098)AK                                                        | 2648.3909 |
| Q8BR92     | AELVLIDEDDEKS(1)LR                                                                                   | 1743.8891 |
| Q3UNN4     | AENKVENES(1)DEGDKIQDR                                                                                | 2074.9403 |
| B9EHN0     | AENYDIS(1)PADR                                                                                       | 1249.5575 |
| P55144     | AEQPTES(0.033)GS(0.967)PEVHCGER                                                                      | 1868.7959 |
| P55144     | AEQPTES(0.001)GS(0.999)PEVHCGER                                                                      | 1868.7959 |
| Q9CRB0     | AESCGS(1)FDETESEESSK                                                                                 | 1877.7109 |
| Q9JIS5     | AES(1)GGKGER                                                                                         | 889.42536 |
| A0A1B0GR96 | AESGGSSGSS(0.01)QS(0.988)PERPS(0.001)S(0.001)LADR                                                    | 2147.9679 |
| Q4JG03     | AES(1)PEEVACR                                                                                        | 1146.4975 |
| F8WHU5     | AES(1)PETSVESTQSTPQK                                                                                 | 1875.8698 |
| Q6PBC0     | AETAPLPTSVD(1)PEVLNR                                                                                 | 2024.0062 |
| Q6PBC0     | AET(1)APLPTSVD(1)PEVLNR                                                                              | 2024.0062 |
| B2RQQ5     | AETEEAEEPEEDGEDNAS(0.734)GS(0.251)AS(0.015)K                                                         | 2379.931  |
| Q9Z2D6     | AETSESSGSAPAVPEAS(0.007)AS(0.993)PK                                                                  | 1958.9069 |
| G3UX78     | AEVES(1)PLK                                                                                          | 871.4651  |

|            |                                              |           |
|------------|----------------------------------------------|-----------|
| Q61316     | AFS(1)DPFVEAEK                               | 1238.5819 |
| H7BX46     | AFS(1)EDEALAQQDSK                            | 1537.6896 |
| A8IP73     | AFS(1)FPVS(1)PER                             | 1135.5662 |
| A8IP73     | AFS(0.5)FPVS(0.5)PER                         | 1135.5662 |
| A8IP73     | AFS(0.001)FPVS(0.999)PER                     | 1135.5662 |
| Q80XK6     | AFTEVFLDDS(0.5)HS(0.5)PANR                   | 1804.838  |
| A0A571BEW4 | AFYGS(1)EEDEAK                               | 1244.5197 |
| A0A571BEW4 | AFY(0.663)GS(0.337)EEDEAKGPGSEEAATAALPAR     | 2623.2038 |
| Q80TN1     | AGAY(0.155)DFPS(0.842)PEWDT(0.002)VTPEAK     | 2079.9426 |
| Q3UPL4     | AGDGSEHCS(0.583)S(0.417)PDLR                 | 1486.6107 |
| O88939     | AGDS(1)DEESR                                 | 964.37338 |
| Q91XV3     | AGEAS(0.058)AES(0.427)T(0.516)GAADGAAPEEGEAK | 2074.8927 |
| G3UY87     | AGGAGGEGS(1)DDDTSLT                          | 1408.559  |
| S4R2F1     | AGGGAGGS(1)GGS(0.964)GPS(0.036)AILR          | 1427.7117 |
| S4R2F1     | AGGGAGGS(1)GGS(0.999)GPS(0.001)AILR          | 1427.7117 |
| A0A286YDH6 | AGGGRPSSPSVVS(1)EK                           | 1597.806  |
| Q5SUG2     | AGLLS(0.036)S(0.964)PVAR                     | 969.56073 |
| Q5SUG2     | AGLLS(0.045)S(0.955)PVAR                     | 969.56073 |
| A0A0N4SUJ0 | AGNS(1)DS(1)EEDDANER                         | 1507.5659 |
| D3YYN7     | AGQENIS(0.993)VS(0.007)KR                    | 1187.6258 |
| D3YYN7     | AGQENIS(0.994)VS(0.003)KR                    | 1187.6258 |
| Q9EP97     | AGQHS(1)PLR                                  | 864.4566  |
| P06837     | AGS(1)AETESAAK                               | 1020.4724 |
| Q3UFI4     | AGS(1)DAAASRPR                               | 1057.5265 |
| B9EJI9     | AGS(1)DVASEGPSR                              | 1228.5684 |
| A0A087WRM8 | AGS(0.919)IS(0.075)T(0.006)LDSLDFAR          | 1451.7256 |
| Q8CFD2     | AGS(1)PDQEGFFNLLTHVQGDR                      | 2187.0345 |
| F6R1B7     | AGS(0.986)PGS(0.014)EVVTLQQFLEESNK           | 2119.0433 |
| Q3UVZ8     | AGS(0.997)PLCNS(0.003)NLQDSEEDVEPPSYHLFR     | 2960.3247 |
| A0A338P6D9 | AGS(1)PQLDDIR                                | 1070.5356 |
| Q3TDG9     | AGSRLS(1)AEDR                                | 1060.5261 |
| Q80U46     | AGS(0.611)S(0.389)PTQGAQNEAPR                | 1469.6859 |
| E9Q453     | AGS(0.001)S(0.947)S(0.051)LEAVR              | 975.49852 |
| Q8VED9     | AGS(1)VADSDAVVK                              | 1117.5615 |
| Q9QYB8     | AGT(0.687)KS(0.313)PAVS(0.966)PS(0.034)K     | 1128.6139 |
| Q5GH64     | AGT(1)PTLPVFQVR                              | 1284.719  |
| E9PUL5     | AHGGHPGS(1)PR                                | 971.46856 |
| Q3UHE7     | AHNLQDGQLS(0.119)DT(0.119)GDLGEDIAS(0.762)N  | 2269.0095 |
| Q3UHE7     | AHNLQDGQLSDT(0.289)GDLGEDIAS(0.711)N         | 2269.0095 |
| Q3UHE7     | AHNLQDGQLS(0.109)DT(0.119)GDLGEDIAS(0.772)N  | 2269.0095 |
| A0A1L1SQI7 | AHRPSAPS(1)PPPR                              | 1268.6738 |
| F8S0X7     | AHS(1)PQGEGEIPLHR                            | 1526.759  |
| P61967     | AIEQADLLQEEDES(1)PR                          | 1841.8643 |

|            |                                                                         |           |
|------------|-------------------------------------------------------------------------|-----------|
| Q71UP6     | AILFLPLPVS(0.5)S(0.5)D                                                  | 1270.7173 |
| Q71UP6     | AILFLPLPVS(0.654)S(0.346)D                                              | 1270.7173 |
| Q3UJU9     | AIPGEAGDAAILPS(0.207)LS(0.793)QEGQEK                                    | 2180.0961 |
| A0A2U3TZF4 | AISAPT(0.033)S(0.717)PT(0.249)R                                         | 999.53491 |
| A0A2L2P590 | AIS(1)LEGEPR                                                            | 970.50836 |
| D3YZ62     | AIS(1)PTSATSSGR                                                         | 1133.5677 |
| A0A0G2JDC3 | AIT(1)PPVAS(1)PVGR                                                      | 1163.6663 |
| Q6KCD5     | AITSLGGGS(1)PK                                                          | 1099.6237 |
| Q8CIJ3     | AKPAAQSEET(0.006)AT(0.085)S(0.909)PAAS(0.924)PT<br>(0.074)PQS(0.001)AER | 2611.2362 |
| A2ARP8     | AKPAS(1)PAR                                                             | 796.45554 |
| Q3TDI5     | AKPS(0.999)PEHAPT(0.001)ISAPDASGPQK                                     | 2085.0491 |
| D6RG95     | AKS(1)PT(1)PDGSER                                                       | 1143.552  |
| D6RG95     | AKS(1)PTPDGSER                                                          | 1143.552  |
| A2A8V9     | AKS(0.657)PT(0.343)PS(0.012)LS(0.988)PAR                                | 1210.667  |
| Q91V36     | AKT(1)PT(1)PEPFDSETR                                                    | 1574.7577 |
| E9PUD6     | ALDAEGEDSS(0.002)PAS(0.998)PQR                                          | 1628.7278 |
| D3YYY8     | ALDIDS(1)DEEPEAK                                                        | 1430.6413 |
| A0A5F8MPE3 | ALDS(1)WFEEK                                                            | 1123.5186 |
| Q8BST8     | ALEAPPEEDDDVS(1)ANEELAER                                                | 2298.0135 |
| Q8CIJ3     | ALENGEADEPS(0.492)FS(0.547)DPEDFVDDVS(0.961)E<br>EELLGDVVK              | 3608.6054 |
| Q8CIJ3     | ALENGEADEPSFSDPEDFVDDVS(1)EEELLGDVVK                                    | 3608.6054 |
| Q8CIJ3     | ALENGEADEPS(0.472)FS(0.547)DPEDFVDDVS(0.981)E<br>EELLGDVVK              | 3608.6054 |
| P09411     | ALES(1)PERPFLAILGGAK                                                    | 1767.9883 |
| A2AAE1     | ALET(0.005)IPIT(0.995)PIER                                              | 1351.7711 |
| A2ARP8     | ALGLEES(1)PEEEGK                                                        | 1386.6515 |
| Q99J77     | ALGS(0.989)PT(0.011)K                                                   | 672.38064 |
| Q9JM73     | ALIQTCLNSPDS(0.999)PPR                                                  | 1667.8301 |
| F6SMY7     | ALLS(1)S(1)PEGEEK                                                       | 1158.5768 |
| A0A6I8MWZ1 | ALMHPDRHS(1)GAS(1)AEVQKEEEK                                             | 2485.1768 |
| Q921Q7     | ALPLS(1)PAQELQR                                                         | 1321.7354 |
| A0A087WSM1 | ALPRDS(1)LEGDDFEK                                                       | 1590.7526 |
| Q8BLC4     | ALPSVGLQS(0.001)DQS(0.999)PQR                                           | 1581.8111 |
| B7ZNF6     | ALQS(1)PEHHIDPIYEDR                                                     | 1918.9173 |
| P16054     | ALS(1)FDNR                                                              | 821.40317 |
| Q6PBC0     | ALS(1)NLSSR                                                             | 846.45593 |
| F7B9R2     | ALS(1)QDDQDDIHLK                                                        | 1496.7107 |
| Q8BYP9     | ALS(0.996)S(0.004)AQR                                                   | 731.3926  |
| Q99JJ1     | ALSSGPAS(1)PK                                                           | 913.4869  |
| A0A0N4SVU7 | ALVHQLS(0.992)NES(0.008)R                                               | 1252.6524 |
| A0A0N4SVU7 | ALVHQLS(0.982)NES(0.018)R                                               | 1252.6524 |
| A0A0N4SVU7 | ALVHQLS(1)NESR                                                          | 1252.6524 |

|            |                                                                                 |           |
|------------|---------------------------------------------------------------------------------|-----------|
| Q5DTM8     | ALVVPEPEPDS(0.005)DS(0.995)NQER                                                 | 1880.8752 |
| A2APX8     | AMSIASILTNTVEELEES(1)R                                                          | 2092.0358 |
| Q3UC00     | ANENHGS(1)PR                                                                    | 980.44241 |
| Q9CTM9     | ANFDEENAY(0.001)FEDEEEDS(0.008)S(0.008)NVDLPY<br>(0.008)IPAENS(0.753)PT(0.222)R | 3805.6027 |
| Q6NVE5     | ANFSES(1)PPLPR                                                                  | 1213.6091 |
| A0A0N4SWC1 | ANLGSEAEREPLLPGGS(0.834)PGS(0.166)R                                             | 2093.0501 |
| H3BIW0     | ANLS(1)PDR                                                                      | 771.38752 |
| D6Q0F4     | ANRADS(1)EEEGAVELAA                                                             | 1630.7435 |
| F2Z3Z9     | ANS(0.999)FVGT(0.001)AQYVSPELLTEK                                               | 2053.0368 |
| A0A0R4J1Y6 | ANS(1)LDGFAQNC PQDSVNVQPVSR                                                     | 2502.1557 |
| E9Q7E9     | ANS(1)LDNER                                                                     | 917.42027 |
| Q7TSH2     | ANS(1)PDAAFSSPALLR                                                              | 1515.7682 |
| A0A1D5RLY6 | ANS(1)QDSLASR                                                                   | 1047.4945 |
| Q69Z38     | ANTLS(1)PVR                                                                     | 856.47667 |
| E9Q1W0     | ANVVT(0.049)S(0.951)PK                                                          | 814.45487 |
| E9Q1W0     | ANVVT(1)PK                                                                      | 814.45487 |
| E9Q1W0     | ANVVT(0.044)S(0.956)PK                                                          | 814.45487 |
| Q3TN35     | APDRT(1)PPSEEDSAEAER                                                            | 1855.8184 |
| A2ARP8     | APDS(1)GAEVER                                                                   | 1029.4727 |
| G5E8T0     | APEGEETEFYVS(1)PEDLEAQLQSDER                                                    | 2867.2621 |
| E9PV14     | APES(1)DT(1)GDEDQDQER                                                           | 1690.6554 |
| A0A3B2WBC6 | APES(1)PPAAEPAPAVGPAGDPCPPR                                                     | 2307.0954 |
| A2ARP8     | APIS(0.001)LS(0.029)QDPS(0.97)PPLNGSTTSCGPDR                                    | 2453.1493 |
| A0A286YDE4 | APPDS(0.999)PT(0.001)TPVR                                                       | 1136.5826 |
| A0A286YDE4 | APPDS(0.483)PT(0.517)TPVR                                                       | 1136.5826 |
| C9K0Z8     | APPGPLPPAASPGPPAAS(1)PPAAPS(0.538)S(0.462)PR                                    | 2411.2597 |
| E9Q6I5     | APPVPGAVS(0.008)GGS(0.992)GEVDELFDVK                                            | 2126.0532 |
| Q3TV22     | APQS(0.992)PT(0.008)LAPAK                                                       | 1079.5975 |
| A2A8V9     | APQT(0.01)S(0.663)S(0.327)PPPVR                                                 | 1135.5986 |
| Q5U4C3     | APS(1)PAPAVS(1)PK                                                               | 1020.5604 |
| B7ZMR0     | APS(1)PQGR                                                                      | 711.36639 |
| F8WHU5     | APS(0.999)PS(0.001)QPPKK                                                        | 1035.5713 |
| A0A1C7ZMY3 | APSPVVS(0.998)PT(0.002)ELSK                                                     | 1310.7082 |
| Q3UHE9     | APSQAAES(0.536)S(0.463)PT(0.001)K                                               | 1172.5673 |
| Q6KAS0     | APSQPPS(0.966)PT(0.034)EER                                                      | 1294.6153 |
| Q6KAS0     | APSQPPS(1)PTEER                                                                 | 1294.6153 |
| Q3TR97     | APSQPPS(1)PTREER                                                                | 1450.7165 |
| A2AIV3     | APS(1)S(1)DEECFFDLLSK                                                           | 1743.7662 |
| B2RSY3     | APS(0.017)S(0.983)PGR                                                           | 670.33984 |
| Q3UNH4     | APS(1)WDAGAPPPR                                                                 | 1220.5938 |
| S4R1M2     | APTAALS(1)PEPQDSK                                                               | 1410.6991 |
| Q3UH26     | APT(1)PGGGHPDS(1)PGLPAPAGQQQR                                                   | 2192.0723 |

|            |                                                                                    |           |
|------------|------------------------------------------------------------------------------------|-----------|
| A0A1B0GRH3 | APVS(0.01)VACGGES(0.99)PLDGICLSEADK                                                | 2331.0723 |
| Q3TES0     | AQAPELQQUEERPGAVGS(1)PR                                                            | 2148.056  |
| Q3UMU9     | AQEDGQDS(1)EDGPR                                                                   | 1402.5597 |
| O88737     | AQGPGQEAES(1)PR                                                                    | 1312.6008 |
| Q9CYT6     | AQGQIRS(0.999)PT(0.001)K                                                           | 1084.5989 |
| Q99P72     | AQIITEKT(0.163)S(0.837)PK                                                          | 1214.6871 |
| Q99P72     | AQIITEKT(0.768)S(0.232)PK                                                          | 1214.6871 |
| Q5XJE5     | AQIS(1)DDDR                                                                        | 918.40429 |
| Q9QXS1     | AQLEPVAS(1)PAK                                                                     | 1109.6081 |
| D3Z5R4     | AQLVS(1)PPAPPTK                                                                    | 1204.6816 |
| Q9JLM8     | AQPAPPELNS(0.001)ES(0.002)EDYS(0.963)PS(0.028)S(0.005)S(0.001)ETVR                 | 2576.1514 |
| B7ZNJ3     | AQPGS(1)PQALGGPHGPATAK                                                             | 1740.8907 |
| A0A5H1ZRL1 | AQPS(0.5)S(0.5)PGGEGPQLGAAGGPR                                                     | 1789.8707 |
| A0A1B0GR41 | AQRLS(1)QETEALGR                                                                   | 1457.7587 |
| Q8BTI8     | AQS(0.964)GT(0.036)DS(0.102)S(0.899)PEHK                                           | 1242.5477 |
| Q7TSJ2     | AQS(1)PLLPEPLK                                                                     | 1191.6863 |
| A0A1L1ST22 | AQT(0.63)GS(0.37)AGADPTADVSGQS                                                     | 1618.7071 |
| A0A1L1ST22 | AQT(0.73)GS(0.27)AGADPTADVSGQS                                                     | 1618.7071 |
| Q62261     | AQTLPTSVVTITS(0.002)ES(0.713)S(0.284)PGKR                                          | 2058.0957 |
| Q9D481     | ARPSQLPEQSSSAQQNGSVS(0.002)DIS(0.998)PVQAAK                                        | 2966.4694 |
| F8VQ11     | ARS(1)DDYLSR                                                                       | 1081.5152 |
| Q8BNW9     | AS(1)AAEGSEAS(0.951)PPS(0.049)LR                                                   | 1428.6845 |
| H7BX46     | ASADNS(1)PGR                                                                       | 873.39406 |
| D3YUS5     | ASADS(0.036)S(0.963)LENLS(0.001)TASSR                                              | 1594.7435 |
| A0A494BAV2 | AS(1)AEQIEEEVTK                                                                    | 1332.6409 |
| D3Z491     | ASATS(0.02)LS(0.85)GS(0.125)DS(0.005)ETEGK                                         | 1525.6744 |
| H3BIW0     | AS(1)DLEEEENATR                                                                    | 1362.5899 |
| B2RX66     | ASDPQS(1)PPQVSR                                                                    | 1267.6157 |
| Q9QXS6     | ASDSGPSSSSSS(0.001)S(0.004)S(0.148)S(0.847)PPR                                     | 1665.7078 |
| Q9D4F2     | AS(0.002)DS(0.998)PVHR                                                             | 867.41988 |
| Q3UZP2     | AS(1)EEEEPEYGEESR                                                                  | 1510.606  |
| Q9ESN6     | ASEGASIPS(1)PVVR                                                                   | 1268.6725 |
| Q6DID3     | ASEPVKEPVQT(0.007)AQS(0.993)PAPVEK                                                 | 2091.0848 |
| Q6NVE8     | AS(0.416)ES(0.528)DT(0.052)EEFY(0.003)DAPEDVHLG<br>T(0.021)GY(0.001)PVGS(0.978)PGK | 3053.3414 |
| D3Z362     | AS(0.636)ES(0.032)S(0.332)PLLAYR                                                   | 1192.6088 |
| H9KV01     | AS(0.52)ES(0.49)S(0.49)S(0.49)EEKDDY(0.009)EIFVK                                   | 1961.8742 |
| Q3TBZ3     | ASGPAS(1)PEK                                                                       | 842.4134  |
| Q9CZ46     | AS(1)GQAFELILKPPS(0.858)PIS(0.142)EAPR                                             | 2207.195  |
| O70166     | AS(1)GQS(1)FEVILK                                                                  | 1177.6343 |
| Q544Y7     | AS(1)GVAVSDGVIK                                                                    | 1101.603  |
| Q4FK36     | AS(1)GVQVADEVCR                                                                    | 1289.6034 |
| H3BIV5     | ASLESSAAGS(1)PR                                                                    | 1244.6361 |



|            |                                                            |           |
|------------|------------------------------------------------------------|-----------|
| D3Z399     | ASLRS(0.5)AT(0.5)PRLR                                      | 1226.7208 |
| B2RQQ5     | AS(0.421)LS(0.579)PMDEPVPDS(0.062)ES(0.938)PVEK            | 2012.9249 |
| S4R2J8     | AS(1)PDASSNPEPAETR                                         | 1527.6801 |
| Q6GQT6     | ASPEEPGDS(1)PPLR                                           | 1350.6416 |
| Q7TSF4     | AS(1)PGAAPGPR                                              | 879.45626 |
| Q8C916     | AS(1)PGPGELGK                                              | 911.47125 |
| V9GXI9     | AS(1)PGPGGLSGGESLLVK                                       | 1524.8148 |
| A2A7T3     | AS(1)PINEDIR                                               | 1013.5142 |
| Q3TQD2     | AS(1)PLLSDK                                                | 829.45453 |
| Q543V3     | AS(1)PPDTDFSDVR                                            | 1362.6052 |
| A2AU34     | AS(1)PPGLELK                                               | 910.51238 |
| Q0QWG9     | AS(1)PPVPSLVGTSGPR                                         | 1420.7674 |
| G1C1N8     | ASPSCFHS(1)EEDSLK                                          | 1707.7046 |
| Q8BIC0     | AS(1)PSLGGR                                                | 743.3926  |
| E9PUL5     | AS(0.999)PS(0.001)PSPSEAR                                  | 1084.5149 |
| E9PUL5     | AS(1)PSPSPSEAR                                             | 1084.5149 |
| E9PXE2     | AS(1)PT(0.123)S(0.877)PDKK                                 | 929.48181 |
| S4R2T7     | AS(0.723)PT(0.505)S(0.772)PGPEGGACTPQNPPR                  | 1976.901  |
| A0A087WNU5 | AS(0.006)S(0.994)EEEDHSR                                   | 1145.4585 |
| D6RH82     | ASSEQAEQPNQPS(0.038)S(0.96)PPGS(0.002)ENVVPR               | 2491.1575 |
| E9Q9D6     | AS(0.016)S(0.984)FSGISILTR                                 | 1237.6667 |
| Q3UHE9     | ASS(1)LDLNK                                                | 846.4447  |
| Q3TE28     | ASS(1)LEDLVLK                                              | 1073.5968 |
| G3UXH4     | AS(0.002)S(0.998)LGETDESSELR                               | 1479.6689 |
| G3UXH4     | ASS(1)LGETDESSELR                                          | 1479.6689 |
| A0A087WQ48 | AS(0.5)S(0.5)PDDDVQVVFDLICK                                | 2034.9568 |
| I6L9G8     | ASSPDP(1)PLVR                                              | 1334.7194 |
| A0A140LIS5 | ASS(1)PPDR                                                 | 728.34532 |
| A0A140LIS5 | AS(0.545)S(0.455)PPDRIDIFGR                                | 1429.7314 |
| Q8C4N2     | AS(0.229)S(0.771)RPRPDDLEI                                 | 1354.6841 |
| D3Z4K1     | AS(0.022)VAS(0.983)DPES(0.995)PPGGNEPAAASGQR               | 2150.9829 |
| D3Z4K1     | ASVAS(1)DPESPPGGNEPAAASGQR                                 | 2150.9829 |
| D3Z4K1     | ASVSDPES(1)PPGGNEPAAASGQR                                  | 2150.9829 |
| G8JL85     | AS(0.002)VGDS(0.001)S(0.001)QEFS(0.996)PIQEAQQDR           | 2177.9825 |
| Q6DVA0     | AS(0.009)VRGS(0.991)S(0.984)EDDED(0.016)R                  | 1522.6496 |
| Q569Z6     | ASVSDLS(1)PR                                               | 930.47706 |
| E9Q8B3     | AT(0.013)ALS(0.987)EEELDNEDYYSLNVR                         | 2443.1391 |
| D3YUQ9     | ATAPQT(0.001)QHVS(0.999)PMR                                | 1422.7038 |
| Q8BHS4     | ATAQT(1)EER                                                | 904.42502 |
| Q8C845     | ATDELAS(0.919)KLS(0.081)R                                  | 1189.6303 |
| Q9CQV4     | AT(0.469)DS(0.531)HS(0.531)DS(0.469)EEELAAFCPQLD<br>DSTVAR | 2850.225  |
| Q9CQV4     | AT(0.525)DS(0.5)HS(0.5)DS(0.475)EEELAAFCPQLDDST<br>VAR     | 2850.225  |

|            |                                                                 |           |
|------------|-----------------------------------------------------------------|-----------|
| Q61655     | AT(0.022)DS(0.022)WALAVDEQEAAVKS(0.986)MS(0.986)S(0.986)LQIKEEK | 3063.507  |
| Q3TER0     | AATEPSGT(0.018)GS(0.981)DELIK                                   | 1532.7206 |
| Q8K1G7     | ATEIGS(1)PPR                                                    | 926.48214 |
| A0A5F8MPN1 | ATFAGGS(1)R                                                     | 765.37695 |
| A0A2R8W6N3 | ATGVVS(1)AEDADPR                                                | 1187.5418 |
| B9EHN0     | ATLPS(1)PDKLPGFK                                                | 1369.7606 |
| A2AGR1     | AT(0.099)LS(0.866)DS(0.035)EIETNSATSAIFGK                       | 2040.9851 |
| Q60829     | ATLSEPGEEPQHPS(1)PP                                             | 1671.774  |
| P56399     | ATNNS(1)LER                                                     | 903.44101 |
| A0A0A6YW88 | AT(0.732)PAT(0.268)EESTVPATQSSALPAAK                            | 2127.0695 |
| A0A0A6YW88 | AT(1)PATEESTVPATQSSALPAAK                                       | 2127.0695 |
| A0A0A6YW88 | AT(0.738)PAT(0.262)EESTVPATQSSALPAAK                            | 2127.0695 |
| Q3TN44     | AT(1)PEASGSGEK                                                  | 1032.4724 |
| Q3UH88     | ATSACAPIS(0.859)S(0.141)PK                                      | 1188.5809 |
| D3Z2Z6     | ATS(1)VGDQLEAPAR                                                | 1313.6575 |
| P06837     | ATTDNS(0.994)PS(0.006)S(0.001)K                                 | 1006.4567 |
| S4R1B0     | AT(0.537)T(0.463)PPNQGRPDS(0.986)PVY(0.014)ANLQELK              | 2395.2132 |
| A0A087WRY3 | ATVTPS(1)PVK                                                    | 898.51238 |
| A0A0A6YY32 | AVDS(1)LGLDR                                                    | 944.49271 |
| Q5XG69     | AVDS(0.964)S(0.874)S(0.162)EEIEVEVPVDDRR                        | 2114.0491 |
| A0A1W2P6V9 | AVDTLS(1)PDWDFDR                                                | 1535.6892 |
| A0A2R8VK70 | AVEEPLNAFKES(1)K                                                | 1460.7511 |
| Q00PI9     | AVEEQGDDQDS(1)EK                                                | 1448.5903 |
| P60710     | AVFPS(1)IVGR                                                    | 944.54435 |
| Q8BHL3     | AVGGAPS(1)PPPPVR                                                | 1200.6615 |
| A0A0N4SWD0 | AVIES(1)DEEQGR                                                  | 1231.5681 |
| A0A5F8MPF3 | AVLS(1)PIR                                                      | 754.47012 |
| A2AM69     | AVNS(0.606)T(0.39)RET(0.004)PPK                                 | 1198.6306 |
| Q8C6M1     | AVPIA VADEGES(1)ES(1)EDDDLKPR                                   | 2341.0921 |
| Q5SUA5     | AVPLEAVT(0.407)GLS(0.613)VT(0.984)S(0.996)GR                    | 1555.857  |
| Q9EPN1     | AVPNVDAGS(0.017)IIS(0.923)DT(0.06)ER                            | 1642.8162 |
| Q9EPN1     | AVPNVDAGSIIS(0.001)DT(0.16)ERS(0.839)DDGKES(0.001)GK            | 2546.2096 |
| B9EHJ3     | AVPVS(0.776)PS(0.224)AVEEDEDEDGHTVVATAR                         | 2579.1987 |
| B2RXW6     | AVRT(0.009)S(0.358)IY(0.275)T(0.358)K                           | 1037.5869 |
| Q5D0A4     | AVS(0.999)DT(0.001)KK                                           | 747.41267 |
| E9PVU7     | AVS(1)EEGNSAGGAALK                                              | 1474.69   |
| D6RGQ9     | AVS(1)EQDTK                                                     | 876.41888 |
| Q9CS54     | AVS(0.037)S(0.963)PPTSPR                                        | 997.51926 |
| P49586     | AVT(0.013)CDIS(0.987)EDEED                                      | 1381.5191 |
| G3X9N3     | AVT(1)PEKK                                                      | 771.44905 |
| O88587     | AVYQGPS(0.119)S(0.881)PVK                                       | 1188.6139 |

|            |                                            |           |
|------------|--------------------------------------------|-----------|
| O88587     | AVYQGPSS(1)PVK                             | 1188.6139 |
| O88587     | AVYQGPS(1)SPVK                             | 1188.6139 |
| Q3UWU7     | CDES(1)PNREVQSSEAEALAR                     | 2146.9549 |
| Q3UWU7     | CDESPNREVQS(1)SEAEALAR                     | 2146.9549 |
| F7BCP8     | CDTSNNEEEGELDFDFS(1)GDEVPEADR              | 2975.1523 |
| F7CYX4     | CET(0.001)S(0.999)PPPTPR                   | 1140.5234 |
| F7CYX4     | CET(0.458)S(0.542)PPPTPR                   | 1140.5234 |
| B2RXW8     | CET(0.027)S(0.973)PPSSPR                   | 1116.487  |
| P18526     | CEVQLVES(1)GGGLVK                          | 1473.7497 |
| Q3UDA7     | CGSGPVHISGQHLVAVEEDAES(1)EDEDEEDVK         | 3365.4478 |
| D3YYN7     | CIELSCGS(1)VR                              | 1179.5376 |
| D3YYN7     | CIELS(1)CGSVR                              | 1179.5376 |
| A2ARP8     | CLS(1)PDDSTVK                              | 1120.507  |
| A0A286YE88 | CTAPLT(0.159)PS(0.454)S(0.232)S(0.156)PEQR | 1529.7144 |
| E9PV14     | CTDPELVS(0.958)PDS(0.042)GCETTLEEATGSK     | 2582.1    |
| Q9DD05     | DAAQS(0.001)S(0.999)PAFGDR                 | 1220.5422 |
| Q9DD05     | DAAQSS(1)PAFGDR                            | 1220.5422 |
| Q9DD05     | DAAQS(0.583)S(0.417)PAFGDRR                | 1376.6433 |
| P35831     | DADVSEES(1)PPPLPER                         | 1636.758  |
| P35831     | DADVS(0.001)EES(0.999)PPPLPER              | 1636.758  |
| Q69ZR9     | DAQS(1)PLLEVDAASVK                         | 1541.7937 |
| E0CXJ3     | DAS(1)DDLDDLNFFNQK                         | 1755.7588 |
| A0A087WPT7 | DAS(1)DVEDEKPPLPPR                         | 1663.8053 |
| O70166     | DAS(1)LEELQK                               | 1031.5135 |
| E0CXN3     | DAS(1)PKEER                                | 930.44067 |
| Q8K070     | DAS(0.995)PPEPAS(0.005)PTIGLDKK            | 1721.8836 |
| A0A3B2WBH9 | DAS(1)PPPAFKPEPPK                          | 1476.7613 |
| A2AAU2     | DAS(1)PVGLK                                | 785.42832 |
| Q3ZB20     | DAS(1)PVGVK                                | 771.41267 |
| Q8BLA0     | DAVT(0.112)EDS(0.888)PQPPLPSVR             | 1706.8475 |
| Q8BLA0     | DAVTEDS(1)PQPPLPSVR                        | 1706.8475 |
| Q8BLA0     | DAVT(0.225)EDS(0.775)PQPPLPSVR             | 1706.8475 |
| Q7TPW0     | DCALS(1)PDELK                              | 1146.5227 |
| Q3TPT3     | DDDAETGLT(1)DGEEKEEPKEEEK                  | 2492.0562 |
| A0A087WS46 | DDDDIDLFGS(1)DDEESEEAK                     | 2271.8663 |
| Q9Z204     | DDEKEPEEGEDDRDS(1)ANGEDDS                  | 2451.8906 |
| B9EHJ3     | DDISEIQS(0.009)LAS(0.948)DHS(0.043)GR      | 1728.7915 |
| Q3U172     | DDKDEEDDGT(0.001)GS(0.999)PHLNNR           | 2012.8308 |
| A0A0G2JGX4 | DDKS(0.243)S(0.757)PKK                     | 903.46616 |
| A0A0G2JGX4 | DDKS(0.159)S(0.841)PKK                     | 903.46616 |
| D3Z589     | DDS(1)FDSLDSFGSR                           | 1446.5899 |
| A0A087WRY3 | DDS(0.99)HS(0.012)AEDS(0.998)EDEKDDHK      | 1957.741  |
| A0A087WNZ7 | DDSLDLS(1)PQGR                             | 1201.5575 |

|            |                                                                              |           |
|------------|------------------------------------------------------------------------------|-----------|
| Q99P72     | DDS(1)PKEYTDLEVS NK                                                          | 1738.7897 |
| Q3TSE1     | DDS(1)PTQTLASPNACR                                                           | 1631.7209 |
| Q3TSE1     | DDS(0.426)PT(0.507)QT(0.067)LASPNACR                                         | 1631.7209 |
| A2TJV2     | DDVS(1)PEEQGK                                                                | 1102.4778 |
| Q3UGH4     | DDYLET(0.001)LS(0.83)S(0.17)PK                                               | 1266.598  |
| Q3UGH4     | DDYLETLS(0.999)S(0.001)PK                                                    | 1266.598  |
| Q80U46     | DEAAS(1)PGAK                                                                 | 844.39266 |
| A2ARP8     | DEAS(1)EEKEQVLEQK                                                            | 1660.7792 |
| Q80TW3     | DEDGES(1)GPDEGPDLEESSAGYK                                                    | 2281.8982 |
| Q80TW3     | DEDGESGPDEGPDLEES(1)SAGYK                                                    | 2281.8982 |
| A0A0A0MQD4 | DEEPEDINIAIS(1)K                                                             | 1471.7042 |
| S4R2F3     | DEFLPALSLQSGALGGS(0.735)S(0.195)ES(0.07)LK                                   | 2205.1165 |
| Q9D0A2     | DEILPT(0.017)T(0.983)PISEQK                                                  | 1469.7613 |
| Q9D0A2     | DEILPTT(1)PISEQK                                                             | 1469.7613 |
| Q8VDD5     | DELADEIANS(0.654)S(0.346)GK                                                  | 1347.6154 |
| Q3UMP4     | DELTES(1)PK                                                                  | 917.43419 |
| Q4JG03     | DEPPPLS(0.457)PAPLT(0.54)PAT(0.002)PSSLDPFPSR                                | 2635.317  |
| P08551     | DEPPS(1)EGEAEEEEKEK                                                          | 1830.7643 |
| K3W4L0     | DES(0.001)AS(0.01)ET(0.649)S(0.649)T(0.654)PS(0.036)E<br>HS(0.001)AAPSPQVEVR | 2497.1205 |
| A0A0A6YY91 | DES(1)KEPIVEVRT(1)EEER                                                       | 1943.9436 |
| Q69ZA1     | DES(1)PVSHR                                                                  | 925.42536 |
| Q69ZA1     | DES(0.864)PVS(0.136)HR                                                       | 925.42536 |
| J3QPJ0     | DES(0.008)S(0.008)AES(0.008)DIS(0.968)S(0.504)AKAFN<br>T(0.504)VKR           | 2141.0237 |
| A0A0N4SUM4 | DETFGEYS(0.971)DS(0.029)DEKPLK                                               | 1858.8109 |
| G3X9H5     | DEVAEAS(0.994)DPES(0.006)KPCR                                                | 1688.7312 |
| G3X9H5     | DEVAEAS(1)DPESKPCR                                                           | 1688.7312 |
| A0A5F8MPE1 | DEVDAAES(0.003)T(0.991)PT(0.006)DR                                           | 1404.6005 |
| A0A5F8MPE1 | DEVDAAES(0.74)T(0.259)PT(0.002)DRR                                           | 1560.7016 |
| Q80XK6     | DFATAPPT(0.185)S(0.815)PAK                                                   | 1201.5979 |
| Q3TWG5     | DFQEYVEPGEDFPAS(1)PQR                                                        | 2109.928  |
| D3Z0Y2     | DFT(1)PVCTTELGR                                                              | 1394.65   |
| D3Z0Y2     | DFTPVCT(1)TELGR                                                              | 1394.65   |
| A0A654IDS7 | DGAAVAAS(0.015)ADRDS(0.93)PPCAGLNAT(0.027)S<br>(0.027)R                      | 2428.1401 |
| Q5SVR0     | DGAHS(0.215)GDPNS(0.717)AT(0.069)EEDEPPTPK                                   | 2149.9036 |
| E9Q824     | DGDES(0.082)S(0.918)PILTSFELVK                                               | 1735.8516 |
| E9Q824     | DGDES(0.154)S(0.846)PILTSFELVK                                               | 1735.8516 |
| E9Q824     | DGDES(0.013)S(0.973)PILTSFELVK                                               | 1735.8516 |
| Q8C6M1     | DGDRS(0.711)PS(0.288)EDEFSLCDSSSDR                                           | 2259.8822 |
| Q80TV8     | DGGAAS(1)PATEGR                                                              | 1087.4894 |
| F8WGT1     | DGGEALVS(1)PDGTVTEAPR                                                        | 1769.8432 |
| Q99PC9     | DGGGENTDEAQPQPQS(0.045)QS(0.731)PS(0.18)S(0.045)<br>)NK                      | 2357.0004 |

|            |                                                                               |           |
|------------|-------------------------------------------------------------------------------|-----------|
| Q4JG03     | DGGS(1)GNSTIIVSR                                                              | 1261.6262 |
| Q4JG03     | DGGS(1)TIIVSR                                                                 | 1261.6262 |
| Q3V2W5     | DGGS(1)PPLLEK                                                                 | 1011.5237 |
| Q922F2     | DGLALEKT(0.204)S(0.796)PDR                                                    | 1300.6623 |
| Q922F2     | DGLALEKT(0.933)S(0.067)PDR                                                    | 1300.6623 |
| F6U7V1     | DGPS(1)PTSGSSK                                                                | 1018.4567 |
| F6U7V1     | DGPS(1)PTSGS(1)SK                                                             | 1018.4567 |
| Q05D44     | DGS(1)EEDEDNSKR                                                               | 1379.5437 |
| B2KF50     | DGS(1)GENLAASQER                                                              | 1332.5906 |
| B2KF50     | DGS(0.984)GENLAAS(0.363)QERLPS(0.653)DGELPDPG<br>PCAQQPVGK                    | 3375.5637 |
| A0A1L1SSL7 | DGSIS(1)PVSSECSAVER                                                           | 1678.7468 |
| A0A668KLC6 | DGS(1)PDAPAT(1)PEKEEVAFSEYK                                                   | 2266.0277 |
| Q76JQ0     | DGS(1)PLGGCSDSSGSLR                                                           | 1663.7472 |
| P08228     | DGVANVS(1)IEDR                                                                | 1173.5626 |
| Q3U1V6     | DGVLS(1)PSSQAQLSSR                                                            | 1530.7638 |
| A0A571BDA2 | DHLS(1)PDFYDESETDPGAEELPAR                                                    | 2589.1143 |
| Q9D824     | DHS(0.982)PT(0.018)PSVFNSDEER                                                 | 1715.7387 |
| Q9D824     | DHS(1)PTPSVFNSDEER                                                            | 1715.7387 |
| Q9D824     | DHS(0.999)PT(0.001)PSVFNSDEER                                                 | 1715.7387 |
| Q91Z78     | DHS(1)S(1)QS(1)EEVVVEGEK                                                      | 1687.7173 |
| Q9QYB8     | DIATEKPGS(1)PVK                                                               | 1240.6663 |
| Q9QYB8     | DIAT(0.071)EKPGS(0.929)PVKS(0.913)T(0.19)PAS(0.896)<br>PVQS(0.869)PS(0.131)K  | 2407.2595 |
| Q9QYB8     | DIAT(0.563)EKPGS(0.439)PVKS(0.642)T(0.372)PAS(0.98<br>5)PVQS(0.934)PS(0.066)K | 2407.2595 |
| P63101     | DICNDVLS(1)LLEK                                                               | 1417.7123 |
| D3YUQ9     | DIDLFGS(1)DEEEEDKEAAR                                                         | 2066.8916 |
| A0A668KM74 | DIGS(1)ENDFADDEHSTFEDNDSR                                                     | 2513.9691 |
| A0A668KM74 | DIGSENDFADDEHS(1)TFEDNDSR                                                     | 2513.9691 |
| Q9JJ27     | DIILAPES(0.996)CEGS(0.8)PS(0.161)S(0.04)AHS(0.003)K                           | 1983.9208 |
| E9PWW9     | DIQKLS(1)PIPEEVVR                                                             | 1621.9039 |
| P63017     | DIS(1)ENKR                                                                    | 860.43519 |
| Q9QYX7     | DIS(0.999)IS(0.001)EEEIK                                                      | 1161.5765 |
| Q9QYX7     | DIS(0.994)IS(0.006)EEEIK                                                      | 1161.5765 |
| Q9QYX7     | DIS(0.988)IS(0.012)EEEIK                                                      | 1161.5765 |
| A0A0R4J087 | DIS(1)NLEENDETR                                                               | 1433.627  |
| A0A286YCI8 | DIS(1)PEEIDLK                                                                 | 1157.5816 |
| Q3V437     | DKAS(1)PEPEKDFVEK                                                             | 1617.7886 |
| B2RSY3     | DKDS(0.5)S(0.5)EPDENPATEPR                                                    | 1785.7653 |
| E9PV14     | DKS(1)DS(1)ETEGLVFAR                                                          | 1552.7369 |
| A0A1L1ST22 | DKS(1)FDDEESVDGNRPSSAASAFK                                                    | 2458.0884 |
| B7ZMZ2     | DKS(1)PSSLLEDAK                                                               | 1288.6511 |
| B7ZD63     | DKS(1)PVREPIDNLTPEER                                                          | 1994.0069 |

|            |                                                          |           |
|------------|----------------------------------------------------------|-----------|
| Q9QYB8     | TESVTSGPLS(1)PEGSPSK                                     | 1901.9218 |
| Q9QYB8     | DKTESVTSGPLSPEGS(0.922)PS(0.1)KS(0.874)PS(0.104)<br>K    | 2301.1336 |
| A2ARP8     | DKT(1)PEEKDK                                             | 1088.535  |
| Q3U9Y8     | DKT(0.993)PVQS(0.007)QQPSATTPSGADEK                      | 2171.0342 |
| Q3U9Y8     | DKT(1)PVQSQQPSATTPSGADEK                                 | 2171.0342 |
| A0A668KLC6 | DKVTDGIS(0.879)KS(0.121)PEK                              | 1402.7304 |
| I3PQW3     | DLEFCS(1)T(1)EEEEKETDR                                   | 1886.784  |
| A2AMD0     | DLEFCS(1)T(1)EEEEKETGDR                                  | 1943.8055 |
| A4FUR1     | DLES(1)LS(1)PR                                           | 915.46616 |
| G3UZB0     | DLFSLDSEGPS(0.001)PT(0.182)S(0.817)PPLR                  | 1913.9371 |
| Q9Z1Z0     | DLGHPVEEEDES(1)GDQEDDDDEIDDGDKDQDI                       | 3487.3303 |
| E9PV14     | DLKGPS(1)S(1)QEDES GGLEDSPDR                             | 2216.9669 |
| B7ZMV4     | DLLGGEES(1)PGEK                                          | 1286.599  |
| A0A0G2JDW7 | DLLHPS(1)PEEEK                                           | 1292.6248 |
| Q3UXP3     | DLLSDLQDIS(0.982)DS(0.018)ER                             | 1604.753  |
| Q6PGB9     | DLLS(1)PESGSLVR                                          | 1271.6721 |
| Q6PGB9     | DLLSPESGS(1)LVR                                          | 1271.6721 |
| E9PY18     | DLNSSFET(0.096)S(0.904)PK                                | 1223.567  |
| E9PY18     | DLNSSFETS(1)PK                                           | 1223.567  |
| E9QLQ9     | DLQRPDS(0.001)EHAFS(0.953)PDS(0.047)ENFDWK               | 2519.0989 |
| Q3TPT3     | DLQS(1)AEKEEQEK                                          | 1432.6682 |
| Q80T68     | DLS(1)EELEALK                                            | 1145.5816 |
| D3Z1Z8     | DLS(1)LEEIQKK                                            | 1201.6554 |
| E9Q3M9     | DLS(1)PSEG DV APPKR                                      | 1466.7365 |
| Q99LJ0     | DLS(1)PTLLDNSAAK                                         | 1343.6933 |
| Q3UUK5     | DLTG GDLT(0.011)S(0.989)PDASASSCGR                       | 1865.8061 |
| Q3UUK5     | DLTG GDLTSPDASAS(1)SCGR                                  | 1865.8061 |
| Q3UUK5     | DLTG GDLT(0.003)S(0.997)PDASASSCGR                       | 1865.8061 |
| B2RQQ5     | DLTGQVPT(1)PPVK                                          | 1250.6871 |
| Q8BJ05     | DLVQPKPAS(1)PK                                           | 1293.6929 |
| E9Q3M9     | DMLPS(1)EGDV APPKR                                       | 1510.745  |
| E9Q3M9     | DMS(1)PPEG DV APPK                                       | 1338.6126 |
| P27546     | DMS(1)PSAETEAPLAK                                        | 1445.6708 |
| X5J4K0     | DNAKNT(1)LY(1)LQMS(1)K                                   | 1524.7606 |
| Q3TRX6     | DNFFQVFS(1)PVFER                                         | 1630.778  |
| A0A286YDU2 | DNS(1)EEFLKR                                             | 1136.5462 |
| A0A0A6YXK7 | DNS(0.033)IS(0.964)PES(0.003)DVDTASTISLVTGETER           | 2622.2144 |
| A0A087WQ58 | DPEEAT(0.002)LS(0.006)FPAQS(0.197)LS(0.795)PEPVP<br>QEEK | 2753.292  |
| Q80T41     | DPIEDINS(1)PEHIQR                                        | 1661.8009 |
| F6SMY7     | DPKDS(0.993)PGS(0.007)ENR                                | 1200.5371 |
| A0A1D5RM97 | DPLEEIQPLNDLDES(0.007)QPPAPGS(0.908)PES(0.085)<br>R      | 2829.3305 |

|            |                                                      |           |
|------------|------------------------------------------------------|-----------|
| Q64727     | DPNAS(1)PGDAGEQAIR                                   | 1496.6855 |
| Q3UEX8     | DPSQT(0.67)S(0.33)PLGTPR                             | 1254.6204 |
| Q3UEX8     | DPSQT(0.73)S(0.27)PLGTPR                             | 1254.6204 |
| S4R166     | DPVPQSGLS(0.999)PER                                  | 1280.6361 |
| S4R166     | DPVPQS(0.025)GLS(0.975)PER                           | 1280.6361 |
| S4R166     | DPVPQS(0.101)GLS(0.899)PER                           | 1280.6361 |
| A0A087WSE3 | DQEAPSPEALPS(0.002)PGQES(0.977)PDGPS(0.022)PR        | 2444.1092 |
| Q9Z0R4     | DQFS(1)PDDFLGR                                       | 1295.5782 |
| B7ZCJ0     | DQGEPVS(0.5)PS(0.5)EDEPFSWPGPK                       | 2183.9647 |
| E9PV14     | DQGG(1)QEDVSK                                        | 1148.4946 |
| B1AXH1     | DQGHS(0.003)S(0.541)S(0.34)PT(0.046)GS(0.069)LAR     | 1398.6488 |
| A0A2R8W6N3 | DQGNDS(0.901)AS(0.077)T(0.022)APR                    | 1217.5273 |
| Q8CHR4     | DQKLS(1)ELDDR                                        | 1217.5888 |
| O54991     | DQNLQPILEES(0.066)RS(0.934)E                         | 1656.7955 |
| Q8C078     | DQPPEADGQELPLEAS(0.893)DPES(0.107)R                  | 2279.019  |
| E9Q784     | DQRPS(0.137)S(0.863)PIR                              | 1054.552  |
| A0A494B870 | DQTEDPAS(0.147)S(0.705)PT(0.074)S(0.074)K            | 1361.5947 |
| Q99PP2     | DQVVGGNV(1)PR                                        | 1126.5731 |
| P48437     | DRAS(1)PESLDLTR                                      | 1358.679  |
| Q9Z2C9     | DRDS(1)DEAVFLTA                                      | 1337.6099 |
| Q5SUH7     | DREDS(1)PER                                          | 1002.4367 |
| Q8BNW8     | DRGGDT(0.428)S(0.5)DT(0.062)ES(0.008)S(0.002)IIR     | 1720.8228 |
| Q91W39     | DRS(1)PIRGS(1)PR                                     | 1139.616  |
| Q5M9P7     | DRS(1)PSPLR                                          | 926.49338 |
| Q0VBL3     | DRT(1)PPLLYR                                         | 1129.6244 |
| C9K0Z8     | DS(0.003)AS(0.997)PGAASGLDPLDSAR                     | 1685.7857 |
| C9K0Z8     | DS(0.102)ASPGAAS(0.898)GLDPLDSAR                     | 1685.7857 |
| C9K0Z8     | DS(0.012)AS(0.988)PGAASGLDPLDSAR                     | 1685.7857 |
| Q3TUJ9     | DSASQDINLNS(1)PNK                                    | 1501.7009 |
| A7TU71     | DSCS(0.013)S(0.987)PPSLNYGK                          | 1410.6085 |
| A7TU71     | DSCS(0.019)SPPS(0.981)LNYPK                          | 1410.6085 |
| A7TU71     | DSCSS(1)PPSLNYGK                                     | 1410.6085 |
| Q5D0A4     | DS(1)DDDDVTVTVDR                                     | 1565.6329 |
| Q3UJU9     | DS(0.635)DKES(0.365)GDAEDEVSCETVR                    | 2126.8546 |
| Q3UPL0     | DSDQVAQS(1)DGEES(1)PAAEEQLLGER                       | 2559.1209 |
| A0A0R4J166 | DS(0.001)EDS(1)LDS(1)VLCY(1)DR                       | 1672.6886 |
| O35954     | DS(0.681)ENS(0.659)S(0.659)EEEEFFDAHEGFSDSDEVFP<br>K | 2979.1843 |
| F7BTP0     | DSGETQASSS(0.01)T(0.094)S(0.896)PR                   | 1408.6066 |
| Q8C943     | DSGLEDGRES(0.993)PS(0.007)FDTPSQR                    | 2078.9141 |
| A0A1B0GRU8 | DSGNWDT(0.001)S(0.003)GS(0.028)ELS(0.968)EGELEK<br>R | 2194.9614 |
| Q52KR3     | DSGPES(1)PGR                                         | 900.39372 |
| S4R2F3     | DSLES(0.003)S(0.997)PVEPK                            | 1186.5717 |

|            |                                                                      |           |
|------------|----------------------------------------------------------------------|-----------|
| S4R2F3     | DSLES(0.024)S(0.976)PVEPK                                            | 1186.5717 |
| S4R2F3     | DSLES(0.012)S(0.988)PVEPK                                            | 1186.5717 |
| Q05D95     | DSLS(0.001)T(0.004)HT(0.497)S(0.497)PS(0.002)QS(0.999)<br>PNSVHGSR   | 2079.957  |
| Q05D95     | DSLS(0.079)T(0.442)HT(0.218)S(0.26)PS(0.004)QS(0.996)<br>PNSVHGSR    | 2079.957  |
| Q9ES97     | DS(1)PESPFEVIIDK                                                     | 1474.7191 |
| Q69Z96     | DS(1)PVLSNSGPR                                                       | 1127.5571 |
| D6RE33     | DSQDTS(0.002)AEQS(0.998)DHDDEVASLASASGGFGS<br>K                      | 2897.2071 |
| Q3UDH4     | DS(0.583)RPLS(0.417)PVLHLVK                                          | 1459.8511 |
| Q3UDH4     | DS(0.621)RPLS(0.389)PVLHLVK                                          | 1459.8511 |
| F6WJB7     | DS(0.001)S(0.001)IIDPGT(0.004)EQDLPS(0.939)PENS(0.0<br>26)S(0.029)VK | 2314.0812 |
| A0A5F8MPK0 | DSS(0.006)LS(0.993)PT(0.001)GQSQLR                                   | 1374.6739 |
| Q8R4Z6     | DSS(1)PGSLPK                                                         | 886.43961 |
| F7AR27     | DS(0.031)S(0.969)PVPSFGEGTK                                          | 1306.6041 |
| Q3TQV3     | DS(0.354)S(0.292)T(0.292)S(0.062)PGDYVLSVSENSR                       | 1898.8494 |
| Q9WV69     | DSSVPGS(0.837)PS(0.127)S(0.035)IVAK                                  | 1329.6776 |
| A6H8H5     | DSVDDNHLS(1)PSR                                                      | 1340.5957 |
| H3BKM2     | DTAAT(0.003)FQS(0.589)VDGS(0.408)PQAEQSPLESTS<br>K                   | 2580.1827 |
| A0JNY3     | DTAS(0.803)LS(0.016)T(0.004)T(0.128)PS(0.039)ES(0.009<br>)PR         | 1447.6791 |
| A4FUR1     | DTDAYSDLS(1)DGEK                                                     | 1414.5736 |
| P0DP28     | DTDS(1)EEEIR                                                         | 1092.4571 |
| A2A9X5     | DTEVFICT(0.16)T(0.84)PLLK                                            | 1535.7905 |
| A2A9X5     | DTEVFICT(0.21)T(0.79)PLLK                                            | 1535.7905 |
| A2A9X5     | DTEVFICT(0.07)T(0.93)PLLK                                            | 1535.7905 |
| Q542T4     | DTGILDS(1)IGR                                                        | 1045.5404 |
| Q3TDM8     | DT(0.135)GNPFPDS(0.865)GELDNPFQDPAVIQHR                              | 2765.2681 |
| Q3TWL5     | DT(0.001)GS(0.999)PPASEEATGDSR                                       | 1575.6649 |
| Q3TWL5     | DT(0.288)GS(0.712)PPASEEATGDSR                                       | 1575.6649 |
| Q9QXZ0     | DTQDIVHDLES(1)PGIDPSIIK                                              | 2191.1008 |
| A0A668KLC6 | DTS(1)PEKTEK                                                         | 1033.4928 |
| Q6P5D3     | DTS(1)PETCK                                                          | 936.38586 |
| A0A1W2P6X0 | DTTEDS(1)ITEDDKR                                                     | 1523.6587 |
| D3Z4T0     | DT(1)T(1)LGFS(1)RVLENK                                               | 1478.7729 |
| Q04692     | DT(0.013)VIIVS(0.981)EPS(0.99)EDEES(0.013)HDLPS(0.<br>001)VT(0.001)R | 2553.2082 |
| G5E884     | DVAT(0.026)S(0.102)PIS(0.751)PT(0.12)ENNT(0.001)TPP<br>DALTR         | 2296.1183 |
| Q8BG92     | DVDKELS(1)PK                                                         | 1029.5342 |
| Q8BGC0     | DVDQDVS(1)DK                                                         | 1019.4407 |
| H3BJQ2     | DVEFEVVGDS(1)PEK                                                     | 1448.6671 |
| I7HFI3     | DVINRS(0.995)PT(0.005)QLQLGK                                         | 1567.8682 |
| Q5DTN3     | DVLS(1)PLRPSR                                                        | 1138.6459 |



|            |                                                                 |           |
|------------|-----------------------------------------------------------------|-----------|
| B2RQQ5     | DVMSDET(0.002)NNEET(0.003)ES(0.942)PS(0.053)QEF<br>VNITK        | 2742.1814 |
| Q9CS69     | DVQDAIAQS(1)PEKEAK                                              | 1627.8053 |
| B2RQQ5     | DVSDERLS(1)PAK                                                  | 1215.6095 |
| B9EJA2     | DVS(1)PTSR                                                      | 760.37153 |
| Q8VDU7     | DVT(1)IELVT(1)S(1)EK                                            | 1232.65   |
| A0A2I3BRL8 | DVYLS(1)PR                                                      | 848.43922 |
| Q3TJG6     | DWEDDS(1)DEDMSNFDR                                              | 1874.6537 |
| E9Q6E5     | DYDEEEQGYDS(1)EKEK                                              | 1862.733  |
| Q3UHC4     | DYEGPAIS(1)PK                                                   | 1075.5186 |
| P26645     | EAAEAEPAPS(0.5)S(0.5)PAAEAEGASASSTSSPK                          | 2715.1995 |
| F6U7V1     | EAAVPEEEGGT(1)PEK                                               | 1441.6573 |
| Q9CQF4     | EADEEDS(1)DEETSYPER                                             | 1899.713  |
| Q9CQF4     | EADEEDSDEETS(1)YPER                                             | 1899.713  |
| Q6ZQ92     | EADPGET(0.02)S(0.901)S(0.079)EAPSETR                            | 1661.7017 |
| Q6ZQ92     | EADPGET(0.02)SS(0.079)EAPS(0.901)ETR                            | 1661.7017 |
| Q8R2V4     | EADEES(1)DHN                                                    | 1173.4058 |
| Q8C1D8     | EAEDS(1)DS(1)DDNIKR                                             | 1492.6278 |
| Q8C1D8     | EAEDS(0.5)DS(0.5)DDNIKR                                         | 1492.6278 |
| Q05CH7     | EAEES(1)S(1)GEEEDENIEVVYSK                                      | 2701.0886 |
| A0A494BBI9 | EAEENPVGACES(0.1)QGS(0.9)PLK                                    | 1900.8473 |
| A0A494BBI9 | EAEENPVGACES(0.3)QGS(0.7)PLK                                    | 1900.8473 |
| A0A494BBI9 | EAEENPVGACES(0.2)QGS(0.8)PLK                                    | 1900.8473 |
| Q4FJL2     | EAELDS(0.001)ELIIESCDAS(0.004)S(0.011)AS(0.114)EE<br>S(0.87)PKR | 2751.2393 |
| Q3UQF1     | EAELSHPS(0.71)S(0.29)DSEENEAR                                   | 1885.7926 |
| Q3UQF1     | EAELSHPS(0.999)SDS(0.001)EENEAR                                 | 1885.7926 |
| A2ARP8     | EAELT(1)PENIAAAR                                                | 1383.6994 |
| Q6NVE8     | EAENTANQAGNES(1)PVQELR                                          | 2055.9457 |
| Q5RL55     | EAEQGS(1)GEEKEEK                                                | 1448.6267 |
| F6Q7Q7     | EAEVGS(1)DGER                                                   | 1047.4469 |
| Q3V002     | EAGALDSLPGIPLAT(0.163)S(0.674)S(0.163)EDLEKS                    | 2299.1431 |
| Q3V002     | EAGALDSLPGIPLAT(0.026)S(0.974)SEDLEKS                           | 2299.1431 |
| Q8CBQ6     | EAGDS(0.998)PNS(0.002)ASVEAALQR                                 | 1700.7966 |
| O35691     | EAGIVHS(1)DAEKEQEEEEQK                                          | 2183.9818 |
| Q05DT3     | EAGS(1)EAESSADPGPGR                                             | 1602.6758 |
| P70441     | EALVEPAS(0.856)ES(0.144)PR                                      | 1283.6357 |
| P70441     | EALVEPAS(0.001)ES(0.999)PRPALAR                                 | 1791.9479 |
| H3BJU7     | EAQELGS(1)PEDR                                                  | 1229.5524 |
| Q8C6M1     | EAQPPS(1)PR                                                     | 880.44028 |
| A0A668KLC6 | EAS(1)PPTSADK                                                   | 1001.4666 |
| A0A668KLC6 | EASPPS(1)ADK                                                    | 1001.4666 |
| Q9WV69     | ECS(0.004)LS(0.996)PK                                           | 819.37965 |
| A2AEW9     | ECVGS(1)PDPDLEPGEAN                                             | 1684.6886 |

|            |                                                                                                  |           |
|------------|--------------------------------------------------------------------------------------------------|-----------|
| A0A3B2WCD2 | EDAGS(0.996)PS(0.004)AR                                                                          | 888.39372 |
| Q9ERU9     | EDALDDSVS(0.001)S(0.001)S(0.001)S(0.001)VHAS(0.997)<br>)PLAS(0.582)S(0.418)PVR                   | 2412.1405 |
| Q6PBC0     | EDAPPEDKES(1)ESEAK                                                                               | 1659.7112 |
| Q6PBC0     | EDAPPEDKES(0.5)ES(0.5)EAKLDGET(0.001)ASDSESR                                                     | 2907.2377 |
| F6R8S6     | EDEEEDDEPTETET(0.772)S(0.228)GER                                                                 | 2224.8251 |
| F6R8S6     | EDEEEDDEPTETET(1)SGER                                                                            | 2224.8251 |
| A2AI69     | EDEIS(1)PPPPNPVVK                                                                                | 1516.7773 |
| Q91V36     | EDES(1)EDES DILEESPCGR                                                                           | 2094.8172 |
| A0A338P6W1 | EDFS(1)PER                                                                                       | 878.37701 |
| Q5DTN3     | EDGGTLGVFS(1)PK                                                                                  | 1205.5928 |
| Q8K1J5     | EDGIDAVEVAADRPGS(1)PR                                                                            | 1852.8915 |
| P60521     | EDHS(1)LEHR                                                                                      | 1021.4577 |
| Q8BRA9     | EDKS(0.943)PS(0.055)EES(0.19)T(0.166)T(0.077)T(0.047)<br>T(0.019)S(0.497)PES(0.005)ISGSVPSSGSSGR | 2969.3221 |
| Q5U3K5     | EDLS(0.953)DVT(0.047)DEDTGPAQPPPPSK                                                              | 2193.9914 |
| Q5U3K5     | EDLS(0.667)DVT(0.667)DEDT(0.667)GPAQPPPPSK                                                       | 2193.9914 |
| M0QWN7     | EDPAAEPGS(1)PR                                                                                   | 1124.5098 |
| Q9D6E4     | EDS(1)DGGTGGPAR                                                                                  | 1117.4636 |
| P97825     | EDSES(1)PGTQR                                                                                    | 1104.4683 |
| P97825     | EDSES(0.968)PGT(0.032)QR                                                                         | 1104.4683 |
| Q9WTX2     | EDS(0.988)GT(0.011)FS(0.001)LGK                                                                  | 1039.4822 |
| Q5EBJ4     | EDS(0.719)PLGS(0.278)PGS(0.003)QPGTPDEQPVFGK                                                     | 2325.0761 |
| Q8BND1     | EDS(1)PSEDPVFLR                                                                                  | 1389.6412 |
| B7ZN52     | EDSVVAETQLAS(0.719)HS(0.281)PEEQR                                                                | 2110.9767 |
| B7ZN52     | EDSVVAETQLAS(1)HSPPEQR                                                                           | 2110.9767 |
| Q99JF8     | EDTDQEEKAS(1)NEDVTK                                                                              | 1836.7861 |
| H7BX46     | EDT(0.001)S(0.02)S(0.043)CS(0.936)PPGVLLEK                                                       | 1617.7556 |
| D3YVE8     | EDYQEILDS(1)PIK                                                                                  | 1448.7035 |
| Q8BK46     | EEAAAGS(0.032)GS(0.873)T(0.095)GEGDGK                                                            | 1421.5906 |
| E9Q4Y9     | EEAHNMGS(0.281)VHMS(0.86)EICT(0.86)ELKNLR                                                        | 2584.1832 |
| A0A0R4J2D3 | EEAKPAS(1)PSSVQDR                                                                                | 1499.7216 |
| D3Z5X7     | EEAPGAES(0.996)PS(0.004)LR                                                                       | 1241.5888 |
| Q8BYH6     | EEAS(1)DDDMEGDEAVVR                                                                              | 1765.6949 |
| Q6DI58     | EEAT(0.577)VQLS(0.711)S(0.711)VVPNPGS(0.501)S(0.50<br>1)DT(0.519)S(0.481)R                       | 2159.0342 |
| A0A087WRY3 | EEDEEAES(1)PPEKK                                                                                 | 1515.6577 |
| Q99LS6     | EEDLGS(0.977)PT(0.023)GELTSK                                                                     | 1461.6835 |
| Q61687     | EEDS(1)S(1)EDEKQGK                                                                               | 1379.5688 |
| Q8BST8     | EEDS(0.5)S(0.5)PGPQSQSHR                                                                         | 1539.655  |
| Q8BPU5     | EEEAY(1)KAQNQK                                                                                   | 1336.6259 |
| P19246     | EEEEGAAAT(0.475)S(0.525)PPAEEAAS(1)PEK                                                           | 2098.9179 |
| P19246     | EEEEGAAAT(0.521)S(0.479)PPAEEAAS(1)PEK                                                           | 2098.9179 |
| P19246     | EEEEGAAAT(0.173)S(0.827)PPAEEAAS(0.951)PEKET(0.<br>049)K                                         | 2457.1031 |

|            |                                                                |           |
|------------|----------------------------------------------------------------|-----------|
| P08551     | EEEEGGEGEEEDT(0.051)KES(0.949)EEEEK                            | 2425.9252 |
| Q3TVP0     | EEEGGIS(0.014)QES(0.993)S(0.993)EEEQ                           | 1737.6701 |
| P08553     | EEEEQETQEKGS(1)GR                                              | 1634.702  |
| G3X9H5     | EEEWDEEEEEES(0.001)DVPAPT(0.193)S(0.81)PPVS(0.942)PVNS(0.055)R | 3168.3531 |
| P46460     | EEGAS(1)PLDFD                                                  | 1078.4455 |
| Q80U23     | EEGT(0.002)GES(0.241)AGGS(0.757)PAR                            | 1303.564  |
| Q80U23     | EEGT(0.957)GES(0.004)AGGS(0.038)PAR                            | 1303.564  |
| B1AQE4     | EEIAEVANEIES(0.002)LGS(0.183)T(0.815)EER                       | 2103.9808 |
| Q61687     | EEIS(0.409)DHENNV(0.591)ILLEDSDLR                              | 2340.1081 |
| Q8BU14     | EELEQQT(1)DGDCDEEDDDKDGEPK                                     | 2794.0883 |
| D3YVW2     | EENLPEES(1)EEQK                                                | 1459.6314 |
| Q61687     | EENVNS(1)PEDKR                                                 | 1315.6004 |
| Q8R1P3     | EEQELHDIHS(0.989)T(0.011)R                                     | 1492.6906 |
| Q3US81     | EEQELQDIQS(1)R                                                 | 1373.6423 |
| B2RQQ5     | EEQS(1)PVKAEVAEK                                               | 1442.7253 |
| A0A0H2UH20 | EES(1)DGEYDEFGR                                                | 1431.5426 |
| Q3UY04     | EES(0.004)EDDQNHS(0.974)DEDNT(0.023)EVS(1)PVK                  | 2401.963  |
| Q9JLM8     | EES(1)EEGFQIPATITER                                            | 1834.8585 |
| Q5M8R8     | EES(0.738)EES(0.262)DEDMGFGLFD                                 | 1834.6727 |
| A2ARP8     | EES(1)EPEVKEDVIEK                                              | 1658.7887 |
| A3KMN0     | EES(0.263)GEQLS(0.737)PPVEAGQGPPGR                             | 2019.9498 |
| Q8BLH7     | EES(0.993)GS(0.202)S(0.805)EEEAVLQR                            | 1548.6904 |
| Q8BR92     | EES(1)LAT(1)DPAPGTQK                                           | 1442.6889 |
| Q8BR92     | EES(1)LATDPAPGT(1)QK                                           | 1442.6889 |
| A0A0R4J260 | EES(1)S(1)EDENEVSNILR                                          | 1748.7701 |
| S4R2F3     | EES(0.004)S(0.021)QS(0.821)S(0.152)EEKT(0.002)ELK              | 1609.7319 |
| B9EJ80     | EETQPLS(0.519)HS(0.481)PK                                      | 1251.6095 |
| B9EJ80     | EETQPLS(0.4)HS(0.6)PK                                          | 1251.6095 |
| B9EJ80     | EETQPLS(0.8)HS(0.2)PK                                          | 1251.6095 |
| A2APD7     | EEVAS(1)EPEEAASPTTPK                                           | 1770.816  |
| Q3TSH0     | EEVLS(0.78)ES(0.11)ET(0.11)EAHQDAAALDPDVVIK                    | 2694.2872 |
| Q9CSS1     | EFCADHDIS(0.968)PDT(0.028)S(0.004)LR                           | 1761.7628 |
| Q5DTI2     | EFDELS(1)PSAQR                                                 | 1277.5888 |
| Q8BGC0     | EFEEDS(1)DEKEEGDDDEEEVVYER                                     | 2949.1319 |
| V9GXD9     | EFES(1)GDFQDFTR                                                | 1476.6157 |
| Q3URP7     | EFGDGS(1)DENEVEDQEPR                                           | 1950.7715 |
| D3Z4K1     | EFGEDLVEQNSSYVQDS(0.773)PS(0.227)K                             | 2257.0023 |
| Q9JMJ6     | EFGSLPT(0.033)T(0.963)PS(0.004)EQR                             | 1447.6943 |
| A0A140LJB5 | EFITGDVEPT(0.001)DAES(0.001)AWHS(0.998)ENEEEDK                 | 2863.1944 |
| H3BKC6     | EFPALQKDEDS(1)LEEDAQR                                          | 2248.0132 |
| A0A1D5RMC1 | EFQDYIEPEEGCQGS(1)PQR                                          | 2167.9117 |
| Q4KMV6     | EFT(0.023)GS(0.942)PPPS(0.034)AT(0.002)K                       | 1217.5928 |

|            |                                                                     |           |
|------------|---------------------------------------------------------------------|-----------|
| P06837     | EGDGS(1)ATTDAAPAT(0.154)S(0.846)PK                                  | 1574.706  |
| P98191     | EGEAAGGDHET(0.566)ES(0.476)T(0.476)S(0.475)DKET(0.007)DIDDR         | 2563.043  |
| P98191     | EGEAAGGDHET(0.61)ES(0.431)T(0.505)S(0.445)DKET(0.009)DIDDR          | 2563.043  |
| Q3TFP8     | EGEPTVYS(1)DDEEPKDEAR                                               | 2294.9663 |
| Q8BGC0     | EGGS(1)DGDHPER                                                      | 1154.4588 |
| Q8BXR1     | EGILADCEKET(0.66)CS(0.66)PVS(0.66)EGEEFS(0.016)S(0.004)PATNTCGAK    | 3459.4752 |
| Q8BXR1     | EGILADCEKET(0.704)CS(0.634)PVS(0.655)EGEEFS(0.005)S(0.001)PATNTCGAK | 3459.4752 |
| F8VQN6     | EGILS(0.999)PS(0.001)ELR                                            | 1099.5873 |
| Q8BPS5     | EGKEDEAS(1)T(1)DVDEKPK                                              | 1775.8061 |
| A0A0N4SUJ0 | EGLLPASDQEAGGSPDIFS(0.005)S(0.025)S(0.055)S(0.915)PLDK              | 2603.2239 |
| Q8C5G1     | EGLS(1)PAKR                                                         | 856.47667 |
| Q6NZL0     | EGPIGGES(0.978)DS(0.022)EEVR                                        | 1459.6427 |
| Q6NZL0     | EGPIGGES(0.812)DS(0.188)EEVR                                        | 1459.6427 |
| Q6NZL0     | EGPIGGES(1)DSEVR                                                    | 1459.6427 |
| Q5GH64     | EGS(1)AELVPR                                                        | 956.49271 |
| A0A286YCI8 | EGS(0.822)GGS(0.178)VHGDFPK                                         | 1272.5735 |
| Q3UUL7     | EGS(1)KEFIHQSIIEK                                                   | 1756.8632 |
| Q8K4P8     | EGSLS(1)PVNSQK                                                      | 1144.5724 |
| G3X9K3     | EGS(0.988)LT(0.01)GT(0.001)K                                        | 791.4025  |
| G3X9K3     | EGS(0.988)LT(0.12)GTK                                               | 791.4025  |
| Q811H2     | EGS(1)PAPLEPEPGASQPK                                                | 1689.821  |
| Q9Z0H8     | EGS(1)PLHK                                                          | 766.39735 |
| Q5EBJ4     | EGS(1)PLKEESLAR                                                     | 1314.6779 |
| A0A140LJB7 | EGS(1)QGELTPANSQSR                                                  | 1559.7176 |
| P08553     | EGS(1)S(1)EKDEGEQEEEEGETEAE GEGEEAEAK                               | 3226.2553 |
| Q0QEL9     | EGS(0.611)S(0.389)IGAIDS                                            | 1090.5255 |
| Q0QEL9     | EGS(0.811)SIGAIDS(0.189)R                                           | 1090.5255 |
| Q3UZP2     | EGVDDQESLRPSNQQAS(1)K                                               | 1986.9243 |
| H3BKN0     | EGVILT(0.5)NENAAS(0.5)PEQPGDEDAK                                    | 2283.0503 |
| A0A140LHL5 | EHANIDAQSGSQAPNPS(0.004)T(0.019)T(0.038)IS(0.166)PGKS(0.773)PPPAK   | 2983.4635 |
| Q4W8U9     | EHLGPGS(0.5)S(0.5)QEMER                                             | 1455.6412 |
| Q8R0V6     | EHQIS(1)PGDFPNLK                                                    | 1480.731  |
| A0A0R4J087 | EHS(0.74)NEHVT(0.198)ES(0.062)VADLLALEEPVDYK                        | 2723.2926 |
| Q91WF5     | EIDVLEFGES(0.004)APAAS(0.996)K                                      | 1661.8148 |
| Q9EPN1     | EIEDLSQS(0.029)QS(0.966)PES(0.005)ETDYPVSTDTR                       | 2712.1886 |
| D3Z0V2     | EIKPS(0.858)EKPV(0.142)PK                                           | 1337.7555 |
| F6WMJ3     | EIKPS(0.029)ERPLS(0.971)PK                                          | 1379.7773 |
| Q8BTI8     | EIS(0.984)S(0.017)S(0.673)PT(0.299)S(0.027)K                        | 934.46074 |
| Q71LX8     | EKEIS(1)DDEAE E E K G E K                                           | 1863.8222 |

|            |                                                                         |           |
|------------|-------------------------------------------------------------------------|-----------|
| Q6IR43     | EKEPT(0.024)KPLES(0.941)PT(0.206)S(0.823)PVS(0.005)<br>NETTSSFK         | 2619.2916 |
| A0A4X7     | EKFPEFCS(0.045)S(0.045)PS(0.911)PPVEVK                                  | 1962.9397 |
| Q6KAP6     | EKPDS(1)DDDLIESFVTAK                                                    | 2022.927  |
| A2AJH3     | S(0.942)DS(0.058)ASDSQEIK                                               | 2063.9607 |
| A2AJH3     | S(1)DSASDSQEIK                                                          | 2063.9607 |
| Q9DBN5     | EKPY(1)PVAEVEQLDR                                                       | 1671.8468 |
| Q8BJ42     | EKS(1)LDLPDR                                                            | 1071.556  |
| A2A8V9     | EKS(1)PELPEPSVR                                                         | 1366.7092 |
| Q8K232     | EKS(0.652)PPDQS(0.348)AVPNT(0.95)PPS(0.024)T(0.026<br>)PVK              | 2075.0535 |
| Q8K232     | EKS(0.004)PPDQS(0.003)AVPNT(0.978)PPS(0.528)T(0.48<br>8)PVKLEEDLPQEPTSR | 3469.7213 |
| A2ARP8     | ELALS(1)S(1)PEDLTQDFEELKR                                               | 2219.0958 |
| Q8C5C6     | ELAS(1)PLALTPR                                                          | 1166.6659 |
| A2AN08     | ELAS(1)PVS(1)PELR                                                       | 1196.6401 |
| Q3UGJ7     | ELEDLLS(1)PLEESVK                                                       | 1599.8243 |
| A0A1L1SV73 | ELEQHIQT(0.109)S(0.891)DPENFQSEER                                       | 2315.0302 |
| A0PJK9     | ELES(0.988)S(0.012)EEGGSAEER                                            | 1507.6274 |
| Q61361     | ELET(0.003)PS(0.997)EEK                                                 | 1060.4924 |
| Q3UR37     | ELFDYS(1)PPLHK                                                          | 1344.6714 |
| Q3V3I7     | ELGDS(0.5)S(0.5)GEGPEFVEEEEEVALR                                        | 2406.0711 |
| S4R1Y1     | ELGS(1)LPSSR                                                            | 944.49271 |
| Q8VBX2     | ELGS(0.163)S(0.837)VDEVEQLIR                                            | 1572.7995 |
| Q80U19     | ELGS(0.975)T(0.025)EDIYITSR                                             | 1482.7202 |
| A0A510C1L5 | ELLGLEDS(0.007)S(0.993)PAH                                              | 1266.6092 |
| Q0VEJ0     | ELNFVTDSVDQELPS(0.281)S(0.719)PK                                        | 2003.9688 |
| D6RE47     | ELS(1)APAR                                                              | 742.39735 |
| Q61423     | ELS(1)EEEEDEEEEEEEEEGR                                                  | 2481.9151 |
| A0A0J9YTW2 | ELS(1)EGEEKGDPEK                                                        | 1445.6522 |
| Q8BTI8     | ELS(0.974)HS(0.026)PPR                                                  | 921.46683 |
| Q8BTI8     | ELS(0.774)HS(0.226)PPR                                                  | 921.46683 |
| Q8BTI8     | ELS(0.246)HS(0.743)PPRENS(0.008)FES(0.002)S(0.001)L<br>EFK              | 2219.0495 |
| Q3UHD3     | ELS(1)IELANIR                                                           | 1156.6452 |
| A2A4P4     | ELS(1)LDDPEVEQVR                                                        | 1527.7417 |
| Q80U72     | ELS(1)PEGPGK                                                            | 912.45526 |
| Q6P1G0     | ELS(1)PEQDDGFRR                                                         | 1447.6692 |
| A0A2I3BR32 | ELS(1)PEQSTAGKPSDGSSALDR                                                | 2131.0029 |
| Q5SSM3     | ELS(1)PGSGQK                                                            | 901.45051 |
| Q6KAP6     | ELS(1)PQHK                                                              | 837.43447 |
| A2ARP8     | ELS(0.013)S(0.046)EPRT(0.941)PPAQK                                      | 1438.7416 |
| E9Q942     | ELVGDT(0.015)GS(0.018)QEGDNEQPS(0.866)GS(0.098)<br>ET(0.003)EEDPSASPQK  | 3203.3498 |
| P11031     | ELVSSSSSGS(0.028)DS(0.962)DS(0.009)EVEK                                 | 1827.7858 |

|            |                                                               |           |
|------------|---------------------------------------------------------------|-----------|
| Q8BZJ5     | EMEADEAGADGGAS(0.97)PDS(0.03)EHCGPCLCFR                       | 2964.1596 |
| Q61316     | EMLALY(1)T(1)ENEGK                                            | 1396.6544 |
| A2ARP8     | EMTLDQKS(1)PEK                                                | 1304.6282 |
| A0A3Q4EBV8 | ENES(1)PDVR                                                   | 944.41994 |
| F6RWZ9     | ESTESSNT(0.031)T(0.969)IEDEDVK                                | 2618.2083 |
| E3WH30     | ENPPS(0.991)PPT(0.007)S(0.002)PAAPQPR                         | 1641.8111 |
| A0A0R4J0D3 | ENPPVEDS(1)S(1)DEDDKR                                         | 1730.7231 |
| Q3UZ38     | ENQRS(1)PVR                                                   | 984.51009 |
| Q3TDX2     | ENQS(0.034)EGKGS(0.968)DS(0.96)DS(0.038)EGDNPEK               | 2107.8414 |
| Q3TDX2     | ENQS(0.655)EGKGS(0.655)DS(0.655)DS(0.036)EGDNPE<br>KK         | 2235.9364 |
| Q91WF5     | ENSAAPSPGRPQS(0.056)AS(0.944)PAK                              | 1750.8598 |
| Q91WF5     | ENS(0.01)AAPS(0.987)PGRPQS(0.591)AS(0.412)PAKEEQ<br>K         | 2265.0986 |
| Q8BLA0     | ENTQIDDT(0.001)EPLS(0.995)PVS(0.003)NS(0.002)K                | 1972.9225 |
| D3Z4J9     | EPAFSPALQS(1)PKPQGK                                           | 1680.8835 |
| Q3UWX7     | EPAISSQNS(1)PEAR                                              | 1384.6583 |
| E9PWE8     | EPAPES(1)PKPAGVEIR                                            | 1575.8257 |
| B7ZBV7     | EPEPAPPYHS(0.993)PEDS(0.007)R                                 | 1706.7536 |
| B7ZBV7     | EPEPAPPYHS(0.793)PEDS(0.207)R                                 | 1706.7536 |
| B7ZNA3     | EPEPLHS(0.996)PDS(0.004)ER                                    | 1391.6317 |
| F6SLK1     | EPETGLDNT(0.065)S(0.934)PK                                    | 1286.599  |
| Q8VE52     | EPGEEADKPS(1)PEPGSGDPKPR                                      | 2175.008  |
| P97492     | EPGS(0.046)S(0.014)HLGS(0.941)PDTAR                           | 1409.6535 |
| Q923F1     | EPLS(1)DEDEEDNDDVEPISEFR                                      | 2478.0194 |
| P98203     | EPNEDS(1)KPRDAEWT(1)T(1)VFK                                   | 2148.0124 |
| E9Q7E9     | EPS(0.608)GQPEDS(0.392)PEAETSTLDVFTK                          | 2492.1078 |
| C6EQH1     | EPS(1)LHEIGEK                                                 | 1137.5666 |
| Q6IR43     | EPT(0.872)KPLES(0.147)PT(0.557)S(0.418)PVS(0.004)NE<br>TTSSFK | 2362.154  |
| Q6ZPJ9     | EPTSVSDSENIAAIPS(0.005)PVT(0.383)S(0.567)PVLS(0.<br>045)R     | 2552.297  |
| Q9ERZ4     | EPVANQDPVS(0.998)PS(0.002)LVQGR                               | 1791.9115 |
| D3Z6I8     | EQAEAEVAS(1)LNR                                               | 1315.6368 |
| D3YZU5     | EQDVVPFQES(1)PK                                               | 1401.6776 |
| Q5GQ64     | EQEENEEAKS(1)GED                                              | 1492.5801 |
| Q9CT86     | EQES(1)S(1)GEEDNDLSPEER                                       | 1948.777  |
| Q1MXF8     | LS(0.987)T(0.013)DDLK                                         | 1175.6034 |
| F8VQK5     | EQS(0.999)DDET(0.001)EDSVK                                    | 1380.5529 |
| Q922F2     | EQSDISIS(0.999)PR                                             | 1130.5568 |
| Q6NZL0     | EQS(0.008)ES(0.983)LS(0.01)ELR                                | 1176.5622 |
| A0A0G2JF68 | EQSESVNTAPES(0.914)PS(0.086)K                                 | 1588.7217 |
| A2AC90     | EQS(1)PQTLLELK                                                | 1284.6925 |
| Q3UZP2     | EQS(0.149)S(0.851)QES(0.999)GEET(0.001)R                      | 1365.5644 |
| Q3UPL0     | EQT(0.546)LS(0.227)PT(0.227)IINGLHSIAR                        | 1849.0058 |

|            |                                                                        |           |
|------------|------------------------------------------------------------------------|-----------|
| Q8BTI8     | ERAPS(1)PASR                                                           | 969.49919 |
| Q3UHA6     | ERDAEQS(0.001)S(0.5)S(0.5)PR                                           | 1260.5695 |
| Q3TIX9     | EREADEDS(1)EPER                                                        | 1460.6015 |
| A0A0G2JDN3 | ERFS(1)PPR                                                             | 887.46135 |
| F6YCJ0     | ERGS(1)PVSGR                                                           | 943.48354 |
| Q3UNH4     | ERPGS(0.995)T(0.005)GEGDLVSLR                                          | 1571.7903 |
| Q9QYX7     | TPPS(0.001)NLS(0.999)PIEDAS(0.877)PT(0.123)EELR                        | 2562.2926 |
| Q9QYX7     | ERPKT(0.951)PPS(0.046)NLS(0.002)PIEDAS(0.853)PT(0.147)EELR             | 2562.2926 |
| Q3UHD8     | ERS(1)LESSQR                                                           | 1090.5367 |
| Q569Z6     | ERS(1)PALK                                                             | 799.4552  |
| A0A1L1SQE2 | ERS(1)PPLTPK                                                           | 1023.5713 |
| Q3TC46     | ERT(1)KLIT(1)PQVAK                                                     | 1382.8245 |
| F6XQ35     | ES(0.007)AMS(0.459)S(0.532)Y(0.713)LS(0.747)DLKS(0.542)R               | 1572.7454 |
| H9KV01     | ESAQAVAVALS(1)PK                                                       | 1269.6929 |
| A0PJ91     | ESDDKPEIEDVGS(1)DEEEEEK                                                | 2306.9398 |
| A0A2X0SSQ6 | ESDILS(1)DEDEDFFHPLK                                                   | 2024.8963 |
| F8WIH0     | ESDLSDT(0.002)LS(0.805)PS(0.193)KEK                                    | 1534.7362 |
| A2ALU3     | ES(0.174)DS(0.802)AEGDET(0.023)ES(0.001)PEQLVR                         | 1976.8447 |
| Q8BPN8     | ES(0.705)EAGT(0.696)GS(0.649)S(0.951)EHEDGER                           | 1675.6558 |
| Q8BPN8     | ES(0.002)EAGT(0.998)GS(0.915)S(0.085)EHEDGER                           | 1675.6558 |
| A0A0R4J0P6 | ESEEVS(0.997)DS(0.003)ELEQTDSCTDPLPEGR                                 | 2708.1243 |
| Q6NXW8     | ES(1)ELEIK                                                             | 846.43346 |
| Q91XV3     | ESEPQAAADATEVKES(0.426)T(0.574)EEKPK                                   | 2373.1183 |
| Q3UGL9     | ESES(1)PDSAACQIK                                                       | 1420.614  |
| Q99P72     | ES(0.197)ET(0.306)FS(0.481)DS(0.101)S(0.915)PIEIIDEFPTFVSAK            | 2674.2538 |
| Q80ZX8     | ES(0.001)GVDPS(0.001)QVLLS(0.98)PDS(0.013)S(0.004)EAAR                 | 2042.9756 |
| Q01853     | ES(1)IESEIR                                                            | 961.47164 |
| E0CX62     | ESLKEEDES(1)DDDNM                                                      | 1654.6152 |
| Q9CRW9     | ESLPLDLS(0.999)DDQS(0.001)NSK                                          | 1646.7635 |
| Q4JG03     | ES(0.003)NQPPEDS(0.189)S(0.805)PPAS(0.002)S(0.001)ESSSTR               | 2174.92   |
| A2APL8     | ES(0.534)NS(0.462)NQCXY(0.004)AAHNSVVIDECK                             | 2423.0482 |
| A0A0G2JFM9 | ES(1)PEGSYTDDANQEVN                                                    | 1795.7497 |
| A0A0R4J2D7 | ESPGGCTS(0.999)PGS(0.001)QEK                                           | 1419.5936 |
| A0A0R4J2D7 | ESPGGCTS(0.799)PGS(0.201)QEK                                           | 1419.5936 |
| A1L151     | ES(1)PPLLPLGTPC                                                        | 1279.6482 |
| Q6ZQ58     | ESPRPPAAAEAPAGS(1)DGEDGGRR                                             | 2249.0421 |
| D3Z1Z2     | ES(0.964)PS(0.036)HGLELSAPEK                                           | 1479.7205 |
| F6SLK1     | ES(0.689)QS(0.258)VLIADGDGS(0.574)EVS(0.473)DEEEAS(0.005)FPS(0.001)EER | 2997.2847 |
| Q5U3K5     | ES(0.052)S(0.948)DEDRDSK                                               | 1166.4687 |
| E9Q3Y7     | ES(0.001)S(0.012)DNQPPS(0.957)PS(0.03)LPEELK                           | 1852.8691 |

|            |                                                                                            |           |
|------------|--------------------------------------------------------------------------------------------|-----------|
| Q5SVI0     | ES(0.717)S(0.297)DS(0.92)T(0.062)NT(0.004)TIEDEDAK                                         | 1740.7174 |
| Q5SVI0     | ES(0.023)S(0.574)DS(0.386)T(0.016)NT(0.012)T(0.988)IE<br>DEDAK                             | 1740.7174 |
| Q5SVI0     | ESSDSTNT(0.616)T(0.384)IEDEDAK                                                             | 1740.7174 |
| Q5SVI0     | ESSDS(0.008)T(0.936)NT(0.055)T(0.001)IEDEDAK                                               | 1740.7174 |
| Q80TN1     | ES(0.001)S(0.998)ESTNTTIEDEDTK                                                             | 1784.7436 |
| Q3TDM2     | ES(0.68)S(0.32)IENEIAVLR                                                                   | 1358.7042 |
| A0A668KLC6 | ES(0.026)S(0.974)KDEEPLKDK                                                                 | 1403.678  |
| A0A076FSX1 | ES(0.018)S(0.982)PFINSTDTEK                                                                | 1453.6573 |
| Q8K2R3     | ES(0.561)S(0.439)PGIEEISLR                                                                 | 1315.662  |
| Q8K2R3     | ES(0.734)S(0.266)PGIEEISLR                                                                 | 1315.662  |
| B2RQQ5     | ES(0.452)S(0.547)PLY(0.004)S(0.996)PGFS(0.001)DSTSA<br>AK                                  | 1829.8319 |
| Q80T83     | ES(0.027)S(0.969)PS(0.004)HGLLK                                                            | 1053.5455 |
| Q62261     | ESS(0.001)PVPS(0.995)PT(0.004)LDR                                                          | 1283.6357 |
| Q62261     | ES(0.858)S(0.142)PVPS(0.983)PT(0.017)LDRK                                                  | 1411.7307 |
| E9Q1W0     | ESTEES(0.001)NT(0.712)T(0.286)IEDEDVK                                                      | 1782.7643 |
| Q8BWX1     | ESTNIFS(0.919)PS(0.074)DS(0.006)LK                                                         | 1423.6831 |
| G3UYD0     | EST(0.001)S(0.002)S(0.045)KS(0.952)PPR                                                     | 1074.5306 |
| Q3UR39     | ESTVLGDS(0.005)EEPS(0.995)E                                                                | 1377.5783 |
| D3Z1Z8     | ESVPDFPLS(1)PPKK                                                                           | 1439.766  |
| Q8K0U4     | ETAPTSTYS(0.213)S(0.787)PAR                                                                | 1366.6365 |
| A0A087WP83 | ETDPGS(1)PR                                                                                | 857.38791 |
| E9PV14     | ETDPS(1)PEER                                                                               | 1058.4516 |
| P63141     | ETEGEEQAQYLQVT(0.314)S(0.685)CPK                                                           | 2095.9368 |
| A0A1D5RLJ8 | ETEHISPPWGES(0.257)S(0.743)PEELR                                                           | 2068.9338 |
| A0A5F8MPE1 | ET(0.013)EIT(0.987)PEDGED                                                                  | 1233.4885 |
| Q6ZQ58     | ET(0.009)ES(0.679)APGS(0.313)PR                                                            | 1029.4727 |
| B2RQQ5     | ET(0.017)EVS(0.389)KGS(0.509)AES(0.525)PDEGIT(0.18<br>7)T(0.187)T(0.187)EGEGECEQTPEELEPVEK | 4006.7485 |
| Q3UH99     | ETISAIDT(0.048)S(0.952)PK                                                                  | 1160.5925 |
| Q99JF8     | ET(0.042)NVS(0.946)KEDT(0.011)DQEEK                                                        | 1650.7221 |
| Q91XV3     | ETPAAS(0.835)EAPS(0.144)S(0.021)AAK                                                        | 1315.6256 |
| A2ARP8     | ET(0.001)S(0.998)LDIS(0.001)SK                                                             | 978.48696 |
| A0A668KLC6 | ET(0.016)S(0.983)PET(0.001)SLIQDEVALK                                                      | 1758.8887 |
| F6TZK4     | ET(0.231)S(0.726)PIS(0.019)S(0.023)HPVTWQPSK                                               | 1779.8792 |
| A2ARP8     | ET(0.005)S(0.894)PT(0.101)RGEPVPAWEGK                                                      | 1739.8479 |
| Q8C1D8     | ETTVAS(0.001)DS(0.999)EEEAGKEESSVK                                                         | 2110.939  |
| D3YWW9     | EVCES(1)PR                                                                                 | 875.38072 |
| A0A0H2UH20 | EVEDKES(1)EGEEDEDEDLSK                                                                     | 2338.9296 |
| Q61361     | EVGGET(0.064)GS(0.936)PELSGVPR                                                             | 1569.7635 |
| Q61361     | EVGGET(0.995)GS(0.005)PELSGVPR                                                             | 1569.7635 |
| A0JNY3     | EVDHELEDLPS(1)PPPPLS(0.986)PPPT(0.413)T(0.36)S(0.<br>24)PHK                                | 2812.3919 |
| Q8VEH5     | EVLDPDHVGVLEGIDLS(0.927)PEIT(0.073)R                                                       | 2287.206  |



|            |                                                           |           |
|------------|-----------------------------------------------------------|-----------|
| Q3UWL2     | EVS(0.153)ADGKS(0.588)VT(0.649)VT(0.61)FFNGDVKQ<br>VMPDER | 2854.3807 |
| Q810U6     | EVS(0.5)ADVS(0.5)EEENFLTDFK                               | 1957.8793 |
| A0PJ91     | EVS(1)DDEAEEKEEK                                          | 1535.6475 |
| E9Q784     | EVS(1)PEVVR                                               | 913.4869  |
| Q8BX70     | EVS(0.5)T(0.5)PQDVHTTQGVPAAR                              | 1891.9388 |
| P08553     | EVTKES(1)PKEEK                                            | 1302.6667 |
| Q6PB94     | EWS(0.007)LES(0.007)S(0.003)PAQNWT(0.982)PPQPK            | 2080.9854 |
| Q6NVE8     | EYVSNDATQS(1)DDEEK                                        | 1728.6962 |
| E9PV14     | FAS(1)PPGLQR                                              | 971.51886 |
| Q5DTT2     | FCSEGDCAIS(1)PPR                                          | 1494.6231 |
| Q5DTT2     | FCS(0.999)EGDCAIS(0.001)PPR                               | 1494.6231 |
| Q8C0J6     | FCTGDS(1)PPLEAK                                           | 1320.602  |
| D3Z5N5     | FDDS(0.5)DT(0.5)EQIAEEGDDNLAK                             | 2110.8815 |
| D3Z5N5     | FDDS(0.999)DT(0.001)EQIAEEGDDNLAK                         | 2110.8815 |
| Q9Z1T6     | FDDS(0.81)DT(0.19)EQIAEEGDDNLANSASPSK                     | 2654.1104 |
| Q8BTE0     | FDS(1)LEDSPEER                                            | 1322.5626 |
| Q64511     | FDS(0.999)NEEDT(0.001)ASVFAPSFGLK                         | 2059.9375 |
| Q6P2L7     | FFDENES(1)PVDPPHGSK                                       | 1831.8013 |
| A0A0R4J065 | FFDS(1)EDEDFEILSL                                         | 1704.7407 |
| B2RWX7     | FGEAVVVGRPGS(0.996)GDGDS(0.003)DQS(0.001)R                | 2090.9617 |
| B2RWX7     | FGEAVVVGRPGS(1)GDGDSQSR                                   | 2090.9617 |
| Q3U9Y8     | FGGS(0.997)GS(0.003)QVDSAR                                | 1166.5316 |
| Q8BPN8     | FGNVDADS(0.999)PVEET(0.001)IQDHSALK                       | 2271.0655 |
| A0A0N4SWB9 | FGS(1)ADNIPNLK                                            | 1174.5982 |
| Q99J36     | FIDKDQQPS(1)GS(1)EGEDDDAEAALKK                            | 2592.1827 |
| F6Z700     | FLES(0.01)AAADVS(0.99)DEDEDEDTDGR                         | 2284.9091 |
| F6Z700     | FLESAAADVS(1)DEDEDEDTDGR                                  | 2284.9091 |
| P63101     | FLIPNAS(0.914)QPES(0.086)K                                | 1329.6929 |
| P63101     | FLIPNAS(0.5)QPES(0.5)K                                    | 1329.6929 |
| Q9CTF6     | FQEQCPPS(0.998)PEPT(0.002)R                               | 1700.7464 |
| P68181     | FRGS(0.476)GDT(0.519)S(0.005)NFDDYEEEEIR                  | 2264.9458 |
| Q3TLF2     | FSDDS(1)DDDFVQPR                                          | 1541.627  |
| Q3TLF2     | FS(0.001)DDS(0.999)DDDFVQPR                               | 1541.627  |
| Q569Z6     | FSGEEGEIEDDES(0.997)GT(0.003)ENREEK                       | 2384.9728 |
| K3W4L0     | FSHSYLS(0.04)DS(0.919)DT(0.04)EAK                         | 1585.6896 |
| Q8BLC4     | FSIGS(1)DEDSPGLPVK                                        | 1661.7784 |
| Q8BLC4     | FSIGS(0.999)DEDDS(0.001)PGLPVK                            | 1661.7784 |
| A0A668KM74 | FS(1)LEGSR                                                | 794.39227 |
| A0A668KM74 | FS(0.978)LEGS(0.022)R                                     | 794.39227 |
| Q9QYX7     | FS(1)PIQESR                                               | 962.48214 |
| A2A690     | FS(1)PPVGGQSK                                             | 1099.5662 |
| Q8BU75     | FS(1)PVLGR                                                | 774.43882 |

|            |                                                                       |           |
|------------|-----------------------------------------------------------------------|-----------|
| Q3US10     | FS(0.555)T(0.445)PPGELDGGISGR                                         | 1488.7209 |
| Q3US10     | FS(0.5T(0.5)PPGELDGGISGR                                              | 1488.7209 |
| Q8CFX0     | FSVQS(1)PNK                                                           | 905.46068 |
| Q9CY64     | FTAS(1)PLEEEK                                                         | 1149.5554 |
| B7ZNV9     | FTQGLDQLS(1)PPGNR                                                     | 1657.806  |
| F6SWQ9     | FVS(0.999)FTS(0.001)R                                                 | 842.42865 |
| F6SWQ9     | FVS(1)FTSR                                                            | 842.42865 |
| Q60771     | FYY(0.03)S(0.029)S(0.812)GS(0.411)S(0.182)S(0.481)PT(0.056)HAK        | 1517.6787 |
| Q3TPF9     | GAAEEADS(1)EDS(1)DAEEKPVK                                             | 1975.8494 |
| Q9D0B6     | GADS(1)GGEKEEGANR                                                     | 1375.5964 |
| E9PW07     | GAGDEVSELPAPARS(1)PPR                                                 | 1804.9068 |
| Q571B1     | GAGS(0.997)PT(0.003)PLPTK                                             | 1024.5553 |
| Q571B1     | GAGS(1)PTPLPTK                                                        | 1024.5553 |
| P46660     | GANES(1)LER                                                           | 874.41446 |
| A2A4P4     | GAQADHFTESPLS(1)PGSQVQVR                                              | 2210.0716 |
| Q3TIT6     | GAS(1)DDEIKR                                                          | 989.47779 |
| Q80W47     | GAYVPS(0.711)S(0.25)PT(0.039)R                                        | 1033.5193 |
| Q80W47     | GAYVPS(0.991)SPT(0.009)R                                              | 1033.5193 |
| Q3US10     | GCS(1)PGESASGGLSK                                                     | 1292.5667 |
| Q3UHD8     | GCS(1)QDDECVSLR                                                       | 1424.566  |
| D3YZZ4     | GCVS(0.002)S(0.007)PCS(0.992)PR                                       | 1105.4645 |
| Q3UFL8     | GDAAGDKLELS(0.538)EDS(0.448)PNS(0.014)EQELDK                          | 2446.0983 |
| Q3UT19     | GDDDEES(1)DEEAVKK                                                     | 1564.6377 |
| Q8BK03     | GDGGSTPTPGDSLQNPDTASEALS(0.987)EPES(0.012)QR                          | 2999.3228 |
| Q3TE28     | GDNAS(1)PS(0.999)PS(0.001)GTPLVR                                      | 1453.7161 |
| Q3TE28     | GDNAS(1)PS(1)PSGTPLVR                                                 | 1453.7161 |
| P48962     | GDQALS(1)FLK                                                          | 977.5182  |
| A0A140LJ04 | GDQEEELDRPVS(0.634)S(0.366)PGEAEQK                                    | 2198.9927 |
| A0A140LJ04 | GDQEEELDRPVS(0.5)S(0.5)PGEAEQK                                        | 2198.9927 |
| Q62261     | GDQVSQNGLPAEQGS(1)PR                                                  | 1738.8234 |
| P98191     | GDS(1)DVPEVPPSSDR                                                     | 1455.6478 |
| Q3UJA1     | GDS(0.002)IEEILADS(0.998)EDEDEEEER                                    | 2307.935  |
| F6RK07     | GDS(1)PELKPR                                                          | 997.51926 |
| E9Q3M9     | GDT(0.96)PPPET(0.018)IT(0.011)DT(0.012)NLET(0.035)PS(0.76)DT(0.203)ER | 2385.082  |
| P28667     | GDVTAEAAAGAS(1)PAK                                                    | 1372.647  |
| Q9QYI5     | GEEAKLS(0.094)PS(0.877)S(0.029)EEK                                    | 1331.6569 |
| B2RQQ5     | GEAEQS(1)EEEGEEEDKAEDAR                                               | 2235.8887 |
| P26645     | GEATAERPGEAAVASS(0.999)PS(0.001)K                                     | 1813.8806 |
| P26645     | GEATAERPGEAAVASS(1)PSK                                                | 1813.8806 |
| P08553     | GEDS(0.5)S(0.5)DDKVVVTK                                               | 1377.6624 |
| Q9JIS5     | GEGAQDEEEGGAS(0.99)S(0.99)DAT(0.02)EGHDEDEDEIYEGEYQGIPR               | 3840.5267 |

|            |                                                                             |           |
|------------|-----------------------------------------------------------------------------|-----------|
| Q9JIS5     | GEGAQDEEEGGAS(0.661)S(0.661)DAT(0.661)EGHDED<br>DEIY(0.016)EGEY(0.001)QGIPR | 3840.5267 |
| P58871     | GEGVS(0.95)QVGPQT(0.051)PPAPES(1)PR                                         | 1817.8908 |
| B1ARW6     | GEHS(1)PDDNIIFFK                                                            | 1517.7151 |
| D3Z7E5     | GEPNVS(0.963)Y(0.037)ICSR                                                   | 1280.5819 |
| D3Z7E5     | GEPNVS(0.077)Y(0.922)ICS(0.001)R                                            | 1280.5819 |
| C9K0Z8     | GEPQCS(1)PEGPAR                                                             | 1283.5564 |
| A2ARP8     | S(1)PEQEVVR                                                                 | 1893.9221 |
| Q80TU6     | GES(1)DDEKPR                                                                | 1031.452  |
| A5CVE4     | GES(0.5)PVTADVS(0.5)R                                                       | 1116.5411 |
| A5CVE4     | GES(0.999)PVTADVS(0.001)R                                                   | 1116.5411 |
| A5CVE4     | GES(1)PVTADVSR                                                              | 1116.5411 |
| P28667     | GEVAPKET(1)PK                                                               | 1054.5659 |
| Q4FJX4     | GFGFGQGAGALVHS(1)E                                                          | 1432.6735 |
| A0A0G2JDX6 | GFHKFS(0.449)S(0.551)GIES(1)K                                               | 1322.6619 |
| A0A0G2JDX6 | GFHKFS(0.005)S(0.995)GIES(1)K                                               | 1322.6619 |
| D3Z0Q8     | GFKEEGS(1)PDR                                                               | 1120.5149 |
| A2ARP8     | S(1)PPCEDFSVTGESEK                                                          | 1999.8833 |
| B2RRX2     | GFS(1)PQHK                                                                  | 799.39769 |
| Q8BV62     | GFSQYGVVS(0.001)GS(0.795)PT(0.204)K                                         | 1313.6252 |
| Q49S98     | GGAPLPPS(0.755)GS(0.245)K                                                   | 966.51345 |
| Q49S98     | GGAPLPPS(1)GSK                                                              | 966.51345 |
| Q49S98     | GGAPLPPS(0.827)GS(0.173)K                                                   | 966.51345 |
| E9QKE4     | GGFS(1)PFGNTQGPSR                                                           | 1407.6531 |
| Q62376     | GGGS(1)QDNGLEGLGSDGR                                                        | 1688.735  |
| A0A571BEW4 | GGGS(1)ES(1)EQS(1)EEEEDEKK                                                  | 1723.702  |
| Q3V113     | GGGT(1)PDANSLAPPGK                                                          | 1337.6575 |
| Q9JIS5     | GGLS(1)DGEGPPGGR                                                            | 1154.5316 |
| B2RY58     | GGLS(1)PPGHSPGPPR                                                           | 1311.6684 |
| Q5RL55     | GGNVFEALIQDDS(1)EEEEEEEEENR                                                 | 2666.1104 |
| B1AZA5     | GGPAEAPS(1)PR                                                               | 937.46174 |
| G5E8T6     | GGPCS(0.995)PT(0.005)K                                                      | 802.36434 |
| Q2TJI9     | GGQEPAGAGS(1)PS(1)PPEDR                                                     | 1607.7176 |
| Q9Z2D6     | GGG(1)LES DGCPKEPAK                                                         | 1530.6984 |
| B7ZNF6     | GGG(1)PLTTT(0.003)QGGG(0.763)PT(0.234)K                                     | 1387.6943 |
| B7ZNF6     | GGG(1)PLTTT(0.237)QGGG(0.763)PTK                                            | 1387.6943 |
| Q3UMU9     | GGG(0.986)S(0.014)EELHDS(1)PR                                               | 1269.5586 |
| Q3UMU9     | GGG(1)S(1)GEELEDEEPVKK                                                      | 1688.7741 |
| Q99K08     | GGT(1)PSAFDR                                                                | 906.41954 |
| E9Q4D5     | GHAGGQRPEPS(0.113)S(0.887)PDGPAPPTR                                         | 2066.9882 |
| Q8N7N5     | GHGHS(1)DEEDEEQPR                                                           | 1620.6401 |
| Q8CIJ3     | GHPSAGAEIEEGGS(1)DGS(1)AAEAEPR                                              | 2166.905  |
| Q8CIJ3     | GHPS(1)AGAEIEEGGSDGS(1)AAEAEPR                                              | 2166.905  |

|            |                                                                   |           |
|------------|-------------------------------------------------------------------|-----------|
| A0A087WNU5 | GHS(0.995)PEDDWT(0.005)EFSSEEIR                                   | 2019.8446 |
| Q6NY00     | GILAADES(0.877)T(0.118)GS(0.004)IAK                               | 1331.6933 |
| Q6ZPY3     | GIS(1)ALLLNQGNQDK                                                 | 1398.7467 |
| D6RG95     | GIS(1)PIVFDR                                                      | 1002.5498 |
| A0A5F8MPE1 | GIS(0.927)QT(0.073)NLIT(0.002)T(0.026)VT(0.972)PEKK               | 1728.9622 |
| A0A5F8MPE1 | GIS(0.927)QT(0.073)NLITVT(1)PEKK                                  | 1728.9622 |
| E9PW51     | GKAS(1)PFEEDQNR                                                   | 1376.6321 |
| Q8BR89     | GKDS(0.5)S(0.5)GEVLSSV                                            | 1163.567  |
| E9Q3Y7     | GKET(0.907)PEPLVEEGPQS(0.519)PEGES(0.573)QPWL<br>TDDADQR          | 3420.5594 |
| Q3TBZ3     | GKGS(1)PGPQGAK                                                    | 982.51959 |
| A2AG47     | GKHPDGEEDGNS(0.998)DQS(0.002)QASEATGGR                            | 2428.0123 |
| A2AG47     | GKHPDGEEDGNS(0.999)DQSQASEATGGR                                   | 2428.0123 |
| Q5SUR3     | GKT(1)PEEIRK                                                      | 1056.5928 |
| B1AU8      | GLAAEDS(0.982)GGDS(0.018)K                                        | 1105.4887 |
| A0A0N4SVB5 | GLAS(0.001)S(0.998)PTGGALRPR                                      | 1338.7368 |
| Q8BZJ5     | GLEDAPS(0.994)PS(0.006)K                                          | 999.48729 |
| A0A0N4SUJ0 | GLFS(1)DEEDSEDLFSSQSSSKPK                                         | 2418.0711 |
| Q542S9     | GLGPPS(1)PPAPPR                                                   | 1141.6244 |
| Q62079     | GLS(1)ATVTGGQK                                                    | 1017.5455 |
| Q80TA2     | GLS(0.199)DHAS(0.801)LDGQELGAQSR                                  | 1839.8711 |
| Q8CD23     | GLS(1)EDTTEETLK                                                   | 1321.6249 |
| E6Y2W9     | GLS(1)LTETEELR                                                    | 1488.7672 |
| Q3UYG8     | GLS(1)PPHK                                                        | 734.40752 |
| O08553     | GLYDGPVCEVS(0.004)VT(0.996)PK                                     | 1619.7865 |
| Q3U8P5     | GND(1)DGEAESDDPEK                                                 | 1563.5809 |
| Q9WV69     | GNS(1)LPCVLEQK                                                    | 1243.6231 |
| Q3UX26     | GNS(1)PVTAK                                                       | 772.40792 |
| Q5M9P7     | GNVPS(1)PLPTR                                                     | 1135.635  |
| Q9QZM0     | GPAAAPGAAS(1)PPAEPK                                               | 1387.7096 |
| H3BIW0     | GPAGS(1)PCEEGDDVEEDGTSDLR                                         | 2290.9132 |
| F6WMY5     | GPAHLVT(0.015)S(0.985)L                                           | 893.49707 |
| F6WMY5     | GPAHLVT(0.821)S(0.179)L                                           | 893.49707 |
| F6WMY5     | GPAHLVT(0.5)S(0.5)L                                               | 893.49707 |
| Q1HL33     | GPGAAGPGAS(0.216)GS(0.784)GHGEER                                  | 1549.6869 |
| Q1HL33     | GPGAAGPGAS(0.5)GS(0.5)GHGEER                                      | 1549.6869 |
| Q1HL33     | GPGAAGPGAS(0.999)GS(0.001)GHGEER                                  | 1549.6869 |
| A2AB60     | GPGDVVS(0.004)IEILPGAAAT(0.864)PS(0.132)GDDAQ<br>APR              | 2560.2769 |
| A0A571BEW4 | GPGS(1)EEAATAALPAR                                                | 1396.6947 |
| G5E8J2     | GPPET(0.001)GS(0.999)PK                                           | 868.42905 |
| Q7TSV8     | GPQFGS(1)EVELR                                                    | 1217.6041 |
| Q8BTI8     | GPSPEGS(0.004)S(0.014)S(0.012)S(0.049)ES(0.567)S(0.35<br>4)PEHAPK | 1852.8075 |

|            |                                                                              |           |
|------------|------------------------------------------------------------------------------|-----------|
| E9QAQ7     | GPS(0.998)PS(0.479)PVG(0.507)PAS(0.015)VAQS(0.001)<br>R                      | 1579.7954 |
| A0A076FSX1 | GPS(0.999)PVS(0.001)SEGIK                                                    | 1056.5451 |
| Q9WTP5     | GPS(0.094)S(0.906)PEPDFSVFR                                                  | 1420.6623 |
| E9PV14     | GPSSQEDESGLLED(1)PDR                                                         | 1860.761  |
| Q8CFL4     | GPT(0.003)S(0.997)PSTPR                                                      | 898.45084 |
| H3BIV5     | GPVAAS(1)PQKER                                                               | 1138.6095 |
| E9Q706     | GQGT(0.597)AS(0.401)PGS(0.002)VSDLAQTVK                                      | 1701.8533 |
| E9Q706     | GQGT(0.697)AS(0.301)PGS(0.002)VSDLAQTVK                                      | 1701.8533 |
| Q2PMX7     | GQQPPS(0.125)RY(0.875)VPPR                                                   | 1380.7262 |
| Q2PMX7     | GQQPPSR(1)VPPR                                                               | 1380.7262 |
| Q7TSJ2     | GQS(1)PTAPGPTK                                                               | 1039.5298 |
| Q9CQV4     | GQTPLT(0.031)EGS(0.969)EDLDGHS(1)DPEESFAR                                    | 2573.1154 |
| Q9CQV4     | GQTPLT(0.011)EGS(0.989)EDLDGHS(1)DPEESFAR                                    | 2573.1154 |
| Q9CQV4     | GQT(0.01)PLT(0.499)EGS(0.499)EDLDGHS(0.988)DPEES<br>(0.003)FAR               | 2573.1154 |
| Q3UZP2     | GRGS(1)EEDRAPR                                                               | 1228.5909 |
| P63017     | GRLS(1)KEDIER                                                                | 1201.6415 |
| Q3U3F6     | GRLS(1)PVPVPR                                                                | 1076.6455 |
| A1L3S7     | GRLT(1)PS(1)PDIIVLSNEAS(0.237)S(0.763)PR                                     | 2223.1495 |
| A0A5F8MPF3 | GRS(1)EEEELEASK                                                              | 1233.5837 |
| Q8BTI8     | GRS(1)PS(1)PKPR                                                              | 980.55156 |
| E0CXA0     | GS(0.002)AEGS(0.998)S(1)DEEGKLVIDEPAK                                        | 2016.9488 |
| E0CXA0     | GS(0.002)AEGS(0.999)S(0.999)DEEGKLVIDEPAKEK                                  | 2274.0863 |
| B2RQQ5     | GS(0.664)AES(0.279)PDEGIT(0.155)T(0.146)T(0.33)EGE<br>GECEQT(0.426)PEELEPVEK | 3333.4202 |
| Q5EBQ4     | GSAGNEVIDLSDPASNS(0.002)T(0.013)NLS(0.985)PDG<br>K                           | 2444.1303 |
| A0A668KLC6 | GS(1)AQESLDTISPK                                                             | 1331.6569 |
| Q3UHC9     | GS(0.432)AQS(0.567)PQET(0.016)GEIS(0.646)RPQS(0.31<br>4)PES(0.023)DR         | 2342.0735 |
| K4DI58     | GS(1)DDAPDADTAIINAEGGQSGGDDKK                                                | 2503.0946 |
| E9QMX4     | GS(1)DDSVVISFK                                                               | 1249.619  |
| A0A1D5RLW4 | GS(0.66)DEENLDS(0.109)ET(0.109)S(0.109)AS(0.006)T(0<br>.007)ESLLEER          | 2397.0303 |
| D3YXM8     | GS(0.002)DGAS(0.998)PPASPSIIPR                                               | 1507.7631 |
| Q3TDX2     | GSDS(1)DSEGDNPEKK                                                            | 1463.6012 |
| Q5XJE5     | GSDS(1)EDEVLR                                                                | 1105.4887 |
| D3Z589     | GS(0.999)DS(0.001)ESDLPHR                                                    | 1198.5214 |
| Q6A0E5     | GSEDS(1)PPK                                                                  | 815.36611 |
| B9EKC3     | GSEEDPLLS(0.999)PVET(0.001)WK                                                | 1685.8148 |
| B9EKC3     | GSEEDPLLS(0.846)PVET(0.154)WK                                                | 1685.8148 |
| B9EKC3     | GSEEDPLLS(0.748)PVET(0.252)WK                                                | 1685.8148 |
| Q8K232     | GS(1)EENLDETR                                                                | 1148.4946 |
| Q80YA9     | GSES(1)PNSFLDQEYR                                                            | 1627.7114 |
| P31650     | GS(0.991)ET(0.009)LGGGGGAAGTR                                                | 1303.6117 |

|            |                                                               |           |
|------------|---------------------------------------------------------------|-----------|
| Q5GH67     | GS(1)GAGSAALCLR                                               | 1118.5502 |
| P68181     | GS(0.983)GDT(0.017)SNFDDYEEEEIR                               | 1961.7763 |
| Q6ZPE2     | GS(1)GEGQGQILQR                                               | 1228.616  |
| Q4JG03     | GSGTAS(1)DDEFENLR                                             | 1496.6379 |
| Q3TAB8     | GS(0.991)GVAQS(0.009)PQQQPQQPPQPQQPTPPK                       | 2762.3736 |
| O88935     | GSHSQS(0.002)S(0.551)S(0.448)PGALTLGR                         | 1540.7594 |
| P98203     | GSLGS(1)LDR                                                   | 803.41373 |
| Q0VDP2     | GS(0.022)NYHLS(0.978)DNDASDVE                                 | 1621.6492 |
| A5CVE4     | GS(1)PECVGLTETK                                               | 1276.5969 |
| Q9JL04     | GS(1)PGEEWVPEVEEASQR                                          | 1884.849  |
| Q9JL04     | GSPGEEWVPEVEEAS(1)QR                                          | 1884.849  |
| Q3TXP6     | GS(1)PGFTPEDLDR                                               | 1289.5888 |
| A2AJH3     | GS(1)PGDGLGAK                                                 | 857.4243  |
| S4R2F3     | GS(1)PIVQEPEEASEPK                                            | 1595.7679 |
| S4R2F3     | GS(1)PIVQEPEEAS(0.006)EPKEES(0.525)S(0.469)PR                 | 2281.071  |
| Q3UHE1     | GS(1)PPLLDAPAS(1)PPQAPR                                       | 1669.8788 |
| A2A7S8     | GS(0.991)PS(0.009)GGSTAETSDTASIR                              | 1679.7598 |
| Q8BLC4     | GS(0.77)PS(0.23)GLAPILR                                       | 1066.6135 |
| S0DHL8     | GS(0.799)PS(0.201)PAAPGPPAGPLPR                               | 1524.8049 |
| Q3UPB2     | GS(0.671)PT(0.317)GS(0.01)S(0.002)PNNASELSLASLTK              | 2146.039  |
| E9PWE8     | GS(0.999)PT(0.001)RPNPPVR                                     | 1176.6364 |
| Q8R336     | GS(0.997)PVRHS(0.993)PELS(0.01)QEEFGESFADPGSSR                | 2885.3216 |
| Q8QZV4     | GSSAAAPPS(0.872)S(0.128)PPPGR                                 | 1334.6579 |
| Q8QZV4     | GSSAAAPPS(0.772)S(0.228)PPPGR                                 | 1334.6579 |
| A0A087WSE3 | GS(0.004)S(0.996)AESALPR                                      | 973.48287 |
| Q3UUK5     | GSSDSLDS(0.001)LS(0.999)PR                                    | 1219.5681 |
| S4R2F1     | GS(0.909)S(0.091)EASPSR                                       | 876.39372 |
| E9Q6P5     | GS(0.004)S(0.996)LLDR                                         | 746.39227 |
| Q8C489     | GS(0.5)S(0.5)PTHSATPVHTSV                                     | 1463.7005 |
| Q6ZWS7     | GS(0.038)T(0.03)ES(0.174)CNT(0.634)T(0.101)T(0.024)ED<br>EDLK | 1785.7211 |
| Q8CBI1     | GSVISEGSPLTEQEES(0.922)S(0.075)PS(0.003)HDR                   | 2327.0513 |
| Q9Z0V2     | GS(1)VQELSTIQIR                                               | 1329.7252 |
| Q9Z0V2     | GSVQELS(1)TIQIR                                               | 1329.7252 |
| Q4FJL2     | GS(1)VS(1)EDELIAAIK                                           | 1330.698  |
| Q543Y7     | GSVS(0.001)S(0.999)YDR                                        | 869.38791 |
| Q543Y7     | GSVSS(1)YDR                                                   | 869.38791 |
| Q8R464     | GS(0.145)Y(0.004)LT(0.145)HEAS(0.705)GLDEQGEAR                | 1918.8657 |
| Q14C38     | GTDDS(1)PKNSQEDLQDR                                           | 1803.7871 |
| A8DUQ5     | GT(0.002)FAS(0.963)LS(0.036)ELHCDK                            | 1463.6715 |
| Q04447     | GT(0.93)GGVDT(0.07)AAVGGVFDVSNADR                             | 1963.9235 |
| Q9Z268     | GT(1)PTEEQVR                                                  | 1015.4934 |

|            |                                                                |           |
|------------|----------------------------------------------------------------|-----------|
| Q5DTJ4     | GT(0.019)S(0.981)PGSELPPPK                                     | 1165.5979 |
| A0A5F8MPF3 | GT(0.009)S(0.573)QVS(0.017)S(0.4)PSQPPEK                       | 1427.6892 |
| A0A0G2JEA0 | GVAPADS(1)PDAPR                                                | 1151.5571 |
| E9QMX4     | GVDLLLEGVQGES(0.715)S(0.257)PT(0.028)R                         | 1755.9003 |
| E9QMJ1     | GVFPVSFVHILS(1)D                                               | 1415.7449 |
| A0A286YDE4 | GVGVPS(0.019)S(0.981)PVR                                       | 953.52943 |
| A0A7N9VS33 | GVIT(0.987)MNEEY(0.746)ET(0.267)R                              | 1440.6555 |
| Q1JUQ7     | GVQVETIS(1)PGDGR                                               | 1313.6575 |
| A2AWA9     | GVS(1)DEDTDEEKETLK                                             | 1693.753  |
| A0A0A6YY91 | GVTASSS(0.034)S(0.932)PAS(0.034)APK                            | 1245.6201 |
| P70175     | GVTSNT(0.004)S(0.975)DS(0.02)ES(0.001)SSK                      | 1384.5954 |
| P08553     | GVVTNGLDVS(1)PAEEK                                             | 1513.7624 |
| P97427     | HAAPAPS(0.009)AKS(0.986)S(0.929)PS(0.077)K                     | 1334.6943 |
| H3BIY7     | HAELS(0.001)GS(0.999)PLK                                       | 1037.5506 |
| Q8VDP4     | HDLS(1)PYR                                                     | 886.42972 |
| Q3THQ5     | HDS(1)PEDVKR                                                   | 1081.5152 |
| Q8R149     | HDTPLDS(1)PPRR                                                 | 1289.6476 |
| Q8R149     | HDTPLDS(1)PPR                                                  | 1117.5152 |
| Q62261     | HDTSAS(0.003)T(0.016)QS(0.979)T(0.975)PAS(0.02)S(0.06)R        | 1531.6863 |
| B9EIX2     | HEDGTQS(0.984)DS(0.016)EDPLAK                                  | 1627.6962 |
| Q8K070     | HEGFS(1)PK                                                     | 800.3817  |
| A0A5F8MPE1 | HEGKT(0.991)DS(0.009)ER                                        | 1057.4789 |
| S4R2F3     | HEGLAET(0.213)PET(0.885)S(0.885)PES(0.011)LS(0.004)FS(0.001)PK | 2142.0117 |
| S4R2F3     | HEGLAET(0.113)PET(0.885)S(0.885)PES(0.111)LS(0.004)FS(0.001)PK | 2142.0117 |
| Q04447     | HEKFS(1)EVLK                                                   | 1115.5975 |
| A0A0G2JDN3 | HELDS(1)PPQKR                                                  | 1090.5883 |
| O88939     | HFKDEEEDEEEAS(0.995)PDGS(0.005)GR                              | 2161.8672 |
| Q3UYK7     | HGAGDDY(0.001)FIPS(0.999)QEFLEAER                              | 2179.9811 |
| Q8BHL3     | HGAPAAPS(1)PPRR                                                | 1153.5992 |
| F6TGJ2     | HGGGIVANLS(1)EQSLK                                             | 1565.8162 |
| Q68FF6     | HGS(0.999)GADS(0.001)DYENTQSGDPLLGLEGK                         | 2446.0884 |
| Q3UGY7     | HGS(0.228)S(0.737)PS(0.025)T(0.008)GAS(0.001)SR                | 1129.5112 |
| Q8C1Y8     | HIEPELAGRDS(1)PVR                                              | 1574.8165 |
| Q6DFW4     | HIKEEPLS(1)EEEPCTS(0.001)T(0.003)AVPS(0.996)PEKK               | 2721.3167 |
| A0A1D5RM97 | HLGS(1)EDDETNDDEESSTEIPQFSSCSHR                                | 3092.2537 |
| A0A1D5RM97 | HLGS(0.937)EDDET(0.063)NDEESSTEIPQFSSCSHR                      | 3092.2537 |
| B2RWX7     | HLLS(1)PDVSR                                                   | 1022.5509 |
| Q9WV69     | HLS(1)AEDFSR                                                   | 1060.4938 |
| Q9WV69     | HLSAEDFS(1)R                                                   | 1060.4938 |
| A0A6I8MWZ0 | HNQDSQHCS(0.002)LS(0.998)GDEEDELFK                             | 2373.9768 |
| A0A6I8MWZ0 | HNQDSQHCSLS(1)GDEEDELFK                                        | 2373.9768 |

|            |                                                          |           |
|------------|----------------------------------------------------------|-----------|
| Q9D7X1     | HNS(1)VEDAEQGK                                           | 1212.5371 |
| Q8CAF8     | HPPT(1)PPDPSGGLPR                                        | 1423.7208 |
| S4R2F3     | HPPVS(1)PGK                                              | 817.44464 |
| E9PUL5     | HPS(1)S(1)QLAGPGVEGGEGTQKPR                              | 2088.0348 |
| P19246     | HPTDIRPPEQVKS(1)PAK                                      | 1798.969  |
| Q3UC70     | HRS(1)EEENQVNLPK                                         | 1578.775  |
| Q5D0A4     | HSAILAS(1)PNPDEK                                         | 1377.6888 |
| Q8R4E6     | HS(0.007)APS(0.992)PPVS(0.277)VGS(0.723)EEHPHS(0.001)VLK | 2177.0865 |
| E0CX32     | HSGGS(1)PEHLQK                                           | 1175.5683 |
| A0A0U1RNN2 | HSLDS(1)DEEDDDEEGSSK                                     | 1892.7032 |
| A0A0U1RNN2 | HSLDSDEEDDDEEGS(1)SK                                     | 1892.7032 |
| A0A0U1RNN2 | HSLDSDEEDDDEEGSS(1)K                                     | 1892.7032 |
| G3X9H5     | HS(0.998)LS(0.002)CTK                                    | 831.39089 |
| B2RQQ5     | HS(1)PTEDDESAK                                           | 1214.5051 |
| A2A8V9     | HS(1)PTPQQSNR                                            | 1150.5479 |
| S4R2F3     | HS(1)PVFSGKPEK                                           | 1211.6299 |
| S4R2F3     | HS(1)PVSSLK                                              | 853.46577 |
| Q3U237     | HS(0.094)S(0.9)LPT(0.006)ES(1)DEDIAPAQR                  | 1851.8599 |
| A0A1B0GT92 | HS(0.016)S(0.984)PHQSEDEEEPR                             | 1662.687  |
| E9PVC7     | HSSPS(0.046)S(0.046)PT(0.195)S(0.713)PK                  | 1110.5306 |
| B2RQQ7     | HSTPSNSSNPS(0.003)GPPS(0.997)PNS(1)PHR                   | 2139.9682 |
| Q9ERU9     | HST(0.007)PS(0.991)PT(0.002)K                            | 853.42938 |
| F8VQ11     | HS(0.954)T(0.038)S(0.008)DLSDATFSDIR                     | 1650.7485 |
| F8VQ11     | HS(0.954)T(0.046)SDLSDATFSDIR                            | 1650.7485 |
| F8VQ11     | HS(0.854)T(0.138)S(0.008)DLSDATFSDIR                     | 1650.7485 |
| Q9QYX7     | HSWHDEDETFDES(1)PELK                                     | 2214.8978 |
| Q811L7     | HTGPNS(1)PDTANDGFVR                                      | 1683.7601 |
| Q68FE6     | HT(0.011)S(0.891)S(0.098)PEVVAEDR                        | 1325.6212 |
| Q3UGH4     | HVPS(1)PLNLEEVQK                                         | 1488.7936 |
| Q6NWW5     | HY(1)GGLTGLNK                                            | 1058.5509 |
| A0A2L2P590 | HYS(1)PVECDK                                             | 1133.4812 |
| P05202     | IAATILT(0.609)S(0.391)PDLR                               | 1269.7293 |
| Q3URA2     | IACDEEFS(1)DS(1)EDEGEGGRR                                | 2156.8553 |
| Q58E49     | IACEEFS(1)DS(1)DEEGEGGRK                                 | 2142.8648 |
| Q3UF10     | IALNLEGCALS(0.997)PT(0.003)S(0.001)QEPR                  | 1954.9782 |
| Q3UF10     | IALNLEGCALS(1)PTSQEPR                                    | 1954.9782 |
| H3BKV3     | IAVDLS(1)DQEEETAGK                                       | 1603.7577 |
| H3BKV3     | IAVDLS(0.999)DQEEET(0.001)AGK                            | 1603.7577 |
| Q8CCJ4     | ICLEAGS(1)PTGSGDQSSR                                     | 1720.7686 |
| E0CZ78     | ICS(1)FEEAK                                              | 982.44298 |
| Q60668     | NEEDEGHNS(0.744)S(0.256)PR                               | 1970.8566 |
| Q6P6P5     | IDDIPGLS(0.001)DT(0.207)S(0.79)PDL(0.001)S(0.001)R       | 1786.8585 |



|            |                                                                    |           |
|------------|--------------------------------------------------------------------|-----------|
| Q3UG84     | IDIGRLS(1)PEAK                                                     | 1197.6717 |
| Q3UR37     | IDIS(1)PSALR                                                       | 970.54475 |
| Q569Z6     | IDIS(1)PSTFR                                                       | 1034.5397 |
| Q569Z6     | IDISPS(1)TFR                                                       | 1034.5397 |
| Q8C1D8     | IDS(1)DDDEEKEGDEEK                                                 | 1751.6857 |
| Q9WTK7     | IDS(0.953)T(0.047)EVIYQPR                                          | 1319.6721 |
| Q3UVL4     | IDVFS(1)PVEFNK                                                     | 1293.6605 |
| Q3U234     | IEDT(0.003)EHS(0.997)PVAERPGER                                     | 1909.9745 |
| Q71LX8     | IEDVGS(1)DEEDDS(1)GKDKK                                            | 1864.8174 |
| Q3UEX8     | IEIS(1)CALAT(1)EAS(1)RR                                            | 1575.8039 |
| E9QAQ7     | IELLPS(1)R                                                         | 826.49125 |
| E9PWW9     | IES(1)DEEEDFENK                                                    | 1482.5998 |
| E9Q0U7     | IES(1)PKLER                                                        | 970.54475 |
| Q4W8U9     | IETQTQEEVRDS(1)K                                                   | 1561.7584 |
| Q60668     | IFVGGLS(0.998)PDT(0.002)PEEK                                       | 1487.7508 |
| Q60668     | IFVGGLS(1)PDTPEEK                                                  | 1487.7508 |
| Q3TI10     | IGDFGLT(1)KAIET(1)DK                                               | 1506.793  |
| Q9Z0H8     | IGFPST(0.015)S(0.985)PAK                                           | 1003.5338 |
| D6Q0F4     | IGHDS(1)ELENQEK                                                    | 1397.6423 |
| A0A0R4J1B6 | IGQGKY(1)EPGFFPK                                                   | 1466.7558 |
| A2AIS0     | IGS(1)DPYLGQR                                                      | 1104.5564 |
| A0A0A0MQC7 | IGS(0.987)T(0.013)ENLK                                             | 860.46035 |
| B9EHN0     | IHVS(1)DQELQSANASVDDSR                                             | 2069.9614 |
| Q8BJ42     | IIES(1)PERK                                                        | 970.54475 |
| Q8CDA1     | IIPS(0.999)PDDS(0.001)K                                            | 970.49713 |
| Q3UGS6     | IKES(0.998)PS(0.002)EQGSR                                          | 1216.6048 |
| F7CN67     | ILDTSSTLQS(0.001)APAS(0.832)PT(0.167)NK                            | 1829.9371 |
| A2AA85     | ILGS(0.071)AS(0.923)PEEEQEKPIILDRPT(0.006)R                        | 2364.2285 |
| Q3UH99     | ILS(1)DEQLLSTER                                                    | 1402.7304 |
| Q6PNC0     | ILS(1)PFSQK                                                        | 918.51747 |
| Q3UGY4     | ILS(1)PVDSGNK                                                      | 1028.5502 |
| Q3UGY4     | ILS(0.864)PVDS(0.136)GNK                                           | 1028.5502 |
| Q9QXV0     | ILTGS(0.909)S(0.091)EPEAAPAPR                                      | 1494.7678 |
| Q5UAK0     | INS(0.575)S(0.575)GKES(0.575)PGS(0.172)S(0.103)EFFQ<br>EAVSHGK     | 2408.1244 |
| A0A0A0MQC7 | IPAKT(0.158)T(0.842)PS(1)PK                                        | 1038.6073 |
| A0A140LJD2 | IPESELGS(0.999)PT(0.001)LTSAQK                                     | 1656.857  |
| E9QJU8     | IPRPLS(0.933)PT(0.067)K                                            | 1007.6128 |
| P63141     | IPS(1)S(1)PDLKK                                                    | 983.56515 |
| E9QAQ5     | IQAAAS(1)PPANATAASDTNAGDR                                          | 2068.9774 |
| Q99LG1     | IQQAGTVPHS(0.007)QEEDS(0.993)QEEEDVSSR                             | 2941.2809 |
| Q8CBH9     | IQQTGNT(0.047)S(0.953)PR                                           | 1100.5574 |
| Q80ZX8     | IQVQEVDS(0.985)S(0.985)DEEPERPAEAS(0.012)AT(0.<br>014)S(0.006)APAR | 2925.3588 |

|            |                                                                             |           |
|------------|-----------------------------------------------------------------------------|-----------|
| Q8C1D8     | IS(0.979)DS(0.861)ES(0.161)EELPKPR                                          | 1485.7311 |
| Q80TU6     | IS(1)EETER                                                                  | 977.43017 |
| Q8C996     | IS(0.648)ES(0.352)GQFSDGLEDR                                                | 1538.6849 |
| Q8K0A3     | IS(1)LNDDEEEK                                                               | 1190.5303 |
| E9PUC5     | ISNS(0.97)S(0.029)EFS(0.001)AK                                              | 1068.5088 |
| Q8CHE4     | ISPAPSDSSPGELFAGGPGS(1)PPR                                                  | 2179.0546 |
| Q8CHE4     | ISPAPS(1)DSSPGELFAGGPGSPPR                                                  | 2179.0546 |
| Q8CHE4     | ISPAPSDSS(1)PGELFAGGPGSPPR                                                  | 2179.0546 |
| Q8CHE4     | IS(1)PAPSDSSPGELFAGGPGSPPR                                                  | 2179.0546 |
| Q8CHE4     | ISPAPSDS(0.999)SPGELFAGGPGS(0.001)PPR                                       | 2179.0546 |
| Q8CHE4     | ISPAPSDSSPGELFAGGPGS(1)PPR                                                  | 2179.0546 |
| Q8CFL4     | IS(1)PGDQR                                                                  | 771.38752 |
| G5E8X1     | IS(0.965)PQS(0.035)NVDFDLTLR                                                | 1603.8206 |
| Q6R0H7     | IST(0.002)AS(0.998)GDGR                                                     | 862.41446 |
| Q8BP77     | IST(1)EEAIR                                                                 | 917.48181 |
| A0A668KLC6 | IST(1)PERK                                                                  | 829.46577 |
| O08553     | IS(0.5)VGS(0.5)DADLVIWDPDSVK                                                | 1914.9575 |
| Q69ZW3     | ITEIVNQLNALS(0.367)S(0.633)LDEDQDDCIK                                       | 2632.2538 |
| Q8BYI9     | ITFT(0.001)PS(0.171)S(0.806)GIS(0.017)S(0.005)EVTVPR                        | 1776.9258 |
| Q3URA7     | IT(0.789)S(0.736)ES(0.736)T(0.736)REMVVGKPS(0.003)<br>QR                    | 1903.9786 |
| F8VQN6     | IT(0.049)S(0.951)PVLVGEENNVVHNQK                                            | 1976.0327 |
| Q8BI41     | IT(0.001)S(0.999)VIY(1)PHKDR                                                | 1327.7248 |
| A0A5F8MPF0 | IVEGQGQS(0.002)S(0.003)EVIS(0.995)PPEEVNR                                   | 2153.06   |
| A0A5F8MPF0 | IVEGQGQSS(0.003)EVIS(0.997)PPEEVNR                                          | 2153.06   |
| C0HKD9     | IVEPEVVGES(0.828)DS(0.172)EVEGDAWR                                          | 2201.0124 |
| Q8K005     | IVHS(0.779)S(0.22)PS(0.001)SDGR                                             | 1140.5523 |
| Q8BIQ9     | IYAS(0.01)S(0.128)S(0.859)PPDT(0.003)GQR                                    | 1377.6525 |
| A0A087WS76 | IY(1)DEENFLT(1)S(1)NEK                                                      | 1600.7257 |
| A0A5F8MP96 | IYQFPDCDS(1)DEDEDFK                                                         | 2021.7837 |
| Q61158     | IYQY(1)IQSR                                                                 | 1069.5556 |
| Q9DBR1     | KAEDS(1)DS(1)EPEPEDNVR                                                      | 1815.7759 |
| Q91XV3     | KAEGAGT(1)EEEGT(1)PK                                                        | 1402.6576 |
| Q3UR37     | KAEGEPQES(1)PLK                                                             | 1440.7096 |
| B1AQX6     | KAES(1)EELEVQKPQVK                                                          | 1740.9258 |
| P08553     | KAES(1)PVKEK                                                                | 1014.571  |
| Q3UYK7     | KAESSNAEPS(1)DEGNSR                                                         | 1773.7765 |
| Q6A018     | KAPLVAS(0.006)DS(0.022)S(0.082)S(0.082)S(0.082)GGS(<br>0.569)DS(0.156)EDDEK | 2166.94   |
| Q64511     | KAS(0.986)GS(0.014)ENEGDYNPGR                                               | 1579.6863 |
| Q3TJS8     | KAS(0.956)LT(0.044)HEQQQSAR                                                 | 1482.7539 |
| Q8R3Y8     | KAS(1)PEPEGETAGK                                                            | 1299.6307 |
| Q8K3X4     | KAS(1)PEPPDSAESALK                                                          | 1525.7624 |
| Q8K3X4     | KASPEPPDS(1)AESALK                                                          | 1525.7624 |

|            |                                                                          |           |
|------------|--------------------------------------------------------------------------|-----------|
| Q8K3X4     | KAS(1)PEPPDSAES(1)ALK                                                    | 1525.7624 |
| Q8K3X4     | KAS(0.999)PEPPDSAES(0.001)ALK                                            | 1525.7624 |
| Q6IR43     | KAS(1)S(1)S(1)DDEGGPR                                                    | 1204.532  |
| A0A087WRY3 | KDDSHSAEDS(1)EDEKDDHK                                                    | 2085.8359 |
| Q8CCJ3     | KDEDS(1)DDESQSSHGGK                                                      | 1719.682  |
| A2AVJ7     | KDGS(1)PSQAK                                                             | 916.46141 |
| Q3UEX8     | KDPSQTS(1)PLGTPR                                                         | 1382.7154 |
| Q9JJ28     | KDS(1)AQDVQAK                                                            | 1088.5462 |
| E9PV14     | KDS(1)EDSLLAPSLGDR                                                       | 1601.7897 |
| P15920     | KDS(1)EEEVSLLGNDIEEGNSR                                                  | 2347.0775 |
| Q3UVT8     | KDS(0.999)EEGEES(0.001)FSSVQDDLK                                         | 2114.9128 |
| Q3UGC1     | KDS(0.996)EGYS(0.004)ESPDLEFEYADTDK                                      | 2424.0129 |
| Q9QYX7     | KDS(0.836)FS(0.164)QES(0.001)S(0.001)PS(0.098)S(0.841)<br>)PS(0.059)DLAK | 1895.8749 |
| B1AQX6     | KDS(1)GSSSVFAESPGGK                                                      | 1538.7213 |
| Q3UJU9     | KDS(1)LDLDVEAASSPAAAALEEDDSSGR                                           | 2718.2468 |
| A0A1D5RM41 | KDS(1)PIS(0.999)PHFT(0.001)R                                             | 1283.6622 |
| F6WMJ3     | KDS(1)VPQVLLPEEEK                                                        | 1609.8563 |
| D6RIL4     | KDT(1)PPPLVPPAAR                                                         | 1357.7718 |
| Q8CD23     | KEDS(1)DEDEDEEDEDSDS(1)DEDEDDEEDEFEPPIVK                                 | 4059.468  |
| E9Q679     | KEEEDCS(1)S(1)WKK                                                        | 1424.6242 |
| Q6ZPJ3     | KEEKPEVQS(1)PVK                                                          | 1396.7562 |
| Q9CYT6     | KEEPS(1)PSR                                                              | 928.46141 |
| P08551     | KEES(1)AGEEQVAK                                                          | 1303.6256 |
| P99027     | KEES(0.004)EES(0.996)DDDMGFGLFD                                          | 1948.752  |
| Q58E35     | KEES(0.026)EES(0.974)EDDMGFGLFD                                          | 1962.7677 |
| Q8BU14     | KEETPGT(1)PK                                                             | 985.50803 |
| B9EJA2     | KEFDVDT(1)LS(1)K                                                         | 1180.5976 |
| P06837     | KEGDSATTDAAPATS(1)PK                                                     | 1702.801  |
| D6Q0F4     | KEPVQDDS(1)DLDR                                                          | 1415.6529 |
| P26645     | KES(1)GEGAEAEAGATAEGAK                                                   | 1690.7646 |
| B2RQQ5     | KES(1)KEETPEVTK                                                          | 1403.7144 |
| E0CX94     | KES(1)LSESR                                                              | 934.47197 |
| Q4KL59     | KES(1)PPT(1)PDQGAASR                                                     | 1439.7005 |
| D3Z589     | KETDDIDS(1)PKR                                                           | 1302.6416 |
| A0A087WNU5 | KETES(1)DQDDEAEK                                                         | 1522.6271 |
| A2A8V9     | KET(1)ES(1)EAEDDNLDDLER                                                  | 2006.8553 |
| Q8BTI8     | KET(1)PS(1)PR                                                            | 813.43447 |
| P19246     | KET(1)PTEKPK                                                             | 1056.5815 |
| A0A668KLC6 | KET(0.477)S(0.477)PET(0.523)S(0.523)LIQDEVALK                            | 1886.9837 |
| Q3UR37     | KEVQS(1)PEQVK                                                            | 1170.6245 |
| A0A338P684 | KFS(1)GDVVLAAR                                                           | 1161.6506 |
| Q9WV69     | KGAEEDDDDDSDS(1)EEEEIK                                                   | 2237.8819 |

|            |                                                                                 |           |
|------------|---------------------------------------------------------------------------------|-----------|
| Q5RKP3     | KGDS(0.023)S(0.977)AEELK                                                        | 1062.5193 |
| Q6PFZ4     | KGDVEGS(0.036)QS(0.964)QDEGEGSGESER                                             | 2165.8945 |
| P08553     | KGEDS(0.973)S(0.027)DDKVVVTK                                                    | 1505.7573 |
| E0CXA0     | KGS(0.775)AEGS(0.612)S(0.612)DEEGKLVIDEPAK                                      | 2145.0437 |
| Q62018     | KGS(1)GS(1)EQEGEEEEGER                                                          | 1792.7347 |
| A0A1W2P6K7 | KGS(1)PCDTLASSTEK                                                               | 1479.6875 |
| F8SLP9     | KGS(1)PGLTR                                                                     | 814.4661  |
| D3Z3B8     | KGS(1)S(1)DELQAEPEPSR                                                           | 1628.7642 |
| S4R2F3     | KGS(1)S(1)EES(1)VDEDR                                                           | 1336.5743 |
| Q8C714     | KGS(0.982)S(0.989)GNAS(0.03)EVSVACLTER                                          | 1850.8792 |
| Q8C714     | KGS(1)S(1)GNASEVSVACLTER                                                        | 1850.8792 |
| B7ZCJ0     | KGS(1)S(0.81)S(0.19)EVFSDAAR                                                    | 1339.6368 |
| E9PYE2     | KGS(1)VDEDAVEVVELLNSR                                                           | 1957.9956 |
| Q8VDD5     | KGT(1)GDCS(1)DEEVDGK                                                            | 1495.6097 |
| A2AGS6     | KHS(1)QTDLVS R                                                                  | 1169.6153 |
| B9EKJ1     | KLDPAQS(0.504)AS(0.496)R                                                        | 1071.5673 |
| A0A0J9YVG0 | KLEEALS(0.445)T(0.555)EGAEDTGNSDK                                               | 1992.9124 |
| A0A0J9YVG0 | KLEEALS(0.5)T(0.5)EGAEDTGNSDKK                                                  | 2121.0073 |
| O08599     | KLNKTDEEIS(0.172)S(0.828)                                                       | 1262.6354 |
| O08599     | KLNKTDEEIS(0.272)S(0.728)                                                       | 1262.6354 |
| O08599     | KLNKTDEEIS(0.372)S(0.628)                                                       | 1262.6354 |
| O08599     | KLNKTDEEIS(0.472)S(0.528)                                                       | 1262.6354 |
| Q3TS69     | KLS(1)EADNR                                                                     | 931.47231 |
| B6YY24     | KLS(1)EASDER                                                                    | 1033.504  |
| F6WXQ4     | KLS(0.999)LPT(0.001)DLKPDLDVK                                                   | 1680.9662 |
| Q3TDM8     | KLS(1)PTEPR                                                                     | 926.51853 |
| Q3UHE7     | KLS(0.973)S(0.025)S(0.002)ESPAPDTGSSAASGEADTSR<br>PGTQQK                        | 3033.4123 |
| Q3UHE7     | KLS(0.973)S(0.027)SESPAPDTGSSAASGEADTSRPGTQ<br>QK                               | 3033.4123 |
| D3Z1F2     | KLY(1)QADGY(1)AVK                                                               | 1254.6608 |
| A2AWT3     | KMEEMS(1)LS(1)GLDNS(1)K                                                         | 1567.7222 |
| Q9WUF3     | KNS(1)PGVSHSSQK                                                                 | 1254.6317 |
| E9QP01     | KNS(0.448)T(0.549)DLDS(0.004)APEDPT(0.107)S(0.893)<br>PK                        | 1800.8378 |
| Q3TWG5     | KPAS(0.054)VS(0.602)PT(0.143)T(0.214)PT(0.885)S(0.097<br>)PT(0.002)EGEAS(0.002) | 1842.8847 |
| B1AU76     | KPEEES(1)PR                                                                     | 970.47197 |
| Q3UYG8     | KPES(0.423)S(0.364)KDS(0.385)S(0.825)EDES(0.003)GPE<br>EK                       | 1963.8494 |
| Q61548     | KPGNNEGS(1)GAPS(0.981)PLS(0.019)K                                               | 1538.7689 |
| C9K101     | KPPEFEGGES(0.006)LS(0.945)S(0.046)GS(0.003)LCQR                                 | 2063.9582 |
| D3Z0V2     | KPS(1)DEEFAVR                                                                   | 1176.5775 |
| Q3U3M5     | KPS(1)PQPS(1)PPR                                                                | 1089.5931 |
| P16054     | KQET(1)PDEVGSQR                                                                 | 1372.6583 |

|            |                                                        |           |
|------------|--------------------------------------------------------|-----------|
| Q8BPN8     | KQS(1)EVEADLGYPGGK                                     | 1576.7733 |
| Q9QZC2     | KQS(1)QQLLESELR                                        | 1699.9105 |
| Q8BUR4     | KQT(0.216)S(0.783)VDS(0.001)GIVQ                       | 1160.6037 |
| Q8BZ15     | KQY(1)EILIS(1)QLK                                      | 1361.7919 |
| Q9EST5     | RET(1)DDEGEDD                                          | 1307.5113 |
| Q3UID0     | KRS(0.871)PS(0.342)PS(0.771)PT(0.016)PEAK              | 1380.7361 |
| A2AGR1     | KRS(0.997)PT(0.003)ENVNTPVGK                           | 1525.8213 |
| A0A668KM74 | KS(1)AS(1)EDSIR                                        | 991.49344 |
| A9DA50     | KS(1)DAGISSADAPR                                       | 1273.6262 |
| S4R2F3     | KS(1)EEQIGEAK                                          | 1117.5615 |
| A0A668KLC6 | KSEVQAHS(0.999)PS(0.001)R                              | 1224.6211 |
| A0A668KLC6 | KS(1)EVQAHSR                                           | 1224.6211 |
| A0A668KLC6 | SEVQAHS(0.5)PS(0.5)RK                                  | 1352.7161 |
| Q8C5G1     | KS(1)KS(1)PPLR                                         | 911.55525 |
| D3Z3F8     | KS(1)PEQESVSTAPQR                                      | 1542.7638 |
| E9PUC5     | KS(1)PSEGTDEK                                          | 1076.4986 |
| D3YUH8     | KS(0.012)S(0.988)CDAVLSR                               | 1121.5499 |
| S4R255     | KS(1)S(1)GDGPDLR                                       | 1030.5043 |
| A0A1D5RLZ1 | KS(0.072)S(0.928)LPNSK                                 | 859.47633 |
| A0A0G2JDC3 | KS(0.103)S(0.897)PS(0.173)S(0.827)PAVR                 | 1014.5458 |
| A0A338P6P6 | KS(0.742)S(0.248)PS(0.009)TGSLDSGNEK                   | 1579.7326 |
| Q9QYX7     | KS(0.437)S(0.563)T(0.071)S(0.929)FDDDAGR               | 1284.5582 |
| A2AUM6     | KS(0.001)S(0.999)VEGLEPAENK                            | 1386.6991 |
| Q3UHC9     | KT(0.001)DS(0.972)CDS(0.027)GITK                       | 1210.55   |
| Q5DTN3     | KTPS(1)PVR                                             | 783.46029 |
| Q3TLK3     | KT(0.124)S(0.87)DANET(0.006)EDHLES LICK                | 2088.9634 |
| Q7TPE5     | KT(0.5)S(0.5)DPDVILCNSVELIR                            | 1958.0143 |
| Q05D44     | KT(0.729)S(0.756)FDENDS(0.515)EELEDKDSK                | 2114.9128 |
| A0A0J9YUE9 | KT(0.027)S(0.973)GNQDEILVIR                            | 1471.7995 |
| P43274     | KT(0.678)S(0.321)GPPVS(0.002)ELITK                     | 1355.766  |
| S4R2F3     | KT(0.389)S(0.611)LVIVESTDDQSQVFER                      | 2180.0961 |
| S4R2F3     | KT(0.596)S(0.404)LVIVESTDDQSQVFER                      | 2180.0961 |
| F6QYF8     | KT(0.001)S(0.999)PPSV                                  | 714.3912  |
| F6QYF8     | KT(0.326)S(0.674)PPSV                                  | 714.3912  |
| F6QYF8     | KT(0.129)S(0.871)PPSV                                  | 714.3912  |
| A0A5F8MPF3 | KT(0.032)S(0.968)QSEEEPPR                              | 1415.6529 |
| S4R2F3     | KT(0.006)S(0.952)T(0.041)DFSEVIK                       | 1253.6503 |
| S4R2F3     | KT(0.587)S(0.352)T(0.061)DFSEVIK                       | 1253.6503 |
| Q8VBT0     | VEEQEADEEDVS(1)EEEEADR                                 | 2493.0151 |
| A2A8V9     | KVELS(0.841)ES(0.159)EEDKGSK                           | 1563.7628 |
| A4FUR1     | KVSDVT(0.001)S(0.002)S(0.002)GVQS(0.995)FDEEEGD<br>ANN | 2312.9881 |
| P48962     | LAADVKGKS(0.46)S(0.54)QR                               | 1187.6258 |

|            |                                                              |           |
|------------|--------------------------------------------------------------|-----------|
| P16054     | LAAGAES(1)PQPAS(0.064)GNS(0.857)PS(0.079)EDDR                | 2054.9141 |
| A0A0N4SUJ0 | LAAQES(0.854)S(0.145)EAEDVTVD                                | 1718.7959 |
| Q9Z277     | LADDEGDS(1)DSESVGQSR                                         | 1765.7238 |
| E9PW07     | LAEPVASSQVLIVAAAAPT(0.305)S(0.649)PDHS(0.046)P<br>A          | 2498.3017 |
| G3UZD6     | LAGGQTSQPT(0.001)T(0.03)PLT(0.226)S(0.743)PQR                | 1838.9486 |
| Q3UNV7     | LAIQGPEDS(0.921)PS(0.079)R                                   | 1268.6361 |
| Q3TR92     | LALS(0.001)DS(0.999)PDGR                                     | 1029.5091 |
| Q99KG3     | LAS(0.996)DDRPS(0.004)PPR                                    | 1209.6102 |
| A2AGR1     | LAS(1)DSDAESDSR                                              | 1251.5215 |
| Q3UMU9     | LAS(0.936)ES(0.064)ANDDNEDS                                  | 1365.5168 |
| A0A2X0SSA9 | LAS(1)IDEK                                                   | 774.41233 |
| A0A338P729 | LAT(1)PEDKQDIDK                                              | 1371.6882 |
| Q04447     | LAVEALS(0.159)S(0.836)LDGDLS(0.005)GR                        | 1601.8261 |
| H3BKM2     | LCSS(0.046)S(0.032)S(0.762)S(0.155)DT(0.003)S(0.001)P<br>R   | 1282.5459 |
| Q8VED9     | LDDGHLNNS(1)LGS(1)PVQADVYFPR                                 | 2413.1662 |
| D3Z5Y7     | LDEDAS(1)PNEEKGDVPK                                          | 1741.8006 |
| A0A1L1SQP9 | LDEGT(1)PPEPK                                                | 1081.5292 |
| Q6PBC0     | LDGET(0.001)AS(0.996)DS(0.003)ESR                            | 1265.5372 |
| Q8BGT8     | LDHALS(0.447)S(0.536)PS(0.319)S(0.699)PCEEIK                 | 1768.8302 |
| H7BX02     | LDHLS(0.016)S(0.091)S(0.047)APGS(0.844)PPDLLES(0.0<br>01)APK | 2117.0641 |
| Q8K0U4     | LDLTGS(0.998)GGT(0.002)AVPAR                                 | 1313.6939 |
| B9EKJ1     | LDPAQS(0.125)AS(0.875)RENLLLEEQGSIALR                        | 2396.2296 |
| D3YZP9     | LDQPVSAPPS(1)PR                                              | 1262.6619 |
| Q3TTT2     | LDRLT(0.741)S(0.795)T(0.795)AT(0.669)K                       | 1104.6139 |
| Q6PHC0     | LDS(0.998)PS(0.003)RS(0.674)PS(0.318)KVEVT(0.007)EK          | 1757.9159 |
| Q99KF4     | LDS(1)PTLSR                                                  | 887.47125 |
| Q3U5E1     | LDS(0.94)S(0.06)GER                                          | 762.3508  |
| F7AMS7     | LDS(0.002)S(0.998)PVLSPGNK                                   | 1212.635  |
| Q8K224     | LDY(1)LGVS(0.602)Y(0.796)GLT(0.602)PR                        | 1452.7613 |
| Q8K232     | LEEDLPQEPT(0.188)S(0.812)R                                   | 1412.6783 |
| Q8K232     | LEEDLPQEPT(0.698)S(0.302)R                                   | 1412.6783 |
| Q0VGN2     | LEEQLS(1)PR                                                  | 970.50836 |
| S4R1L5     | LEGDSDDLLEDS(0.972)DS(0.028)EEHSR                            | 2146.8774 |
| P55258     | LEGNS(1)PQGS(0.457)S(0.543)HGVK                              | 1395.6743 |
| A2API9     | LEPAAS(0.005)S(0.06)LS(0.935)PDHK                            | 1350.6779 |
| A2API9     | LEPAASS(0.006)LS(0.994)PDHK                                  | 1350.6779 |
| E9PY55     | LEPVS(1)PPS(1)PPHADPELELAPSR                                 | 2334.1856 |
| Q9D8S9     | LEQALS(1)PEVLELR                                             | 1495.8246 |
| Q68FG2     | LEQSNVPEGPGS(0.972)GT(0.027)GDESSGPR                         | 2155.9618 |
| C0HKD9     | LEREDS(1)S(1)EEEEEEIDDEEIER                                  | 2608.0784 |
| H3BJU7     | LES(1)FESLR                                                  | 979.49746 |

|            |                                                                                      |           |
|------------|--------------------------------------------------------------------------------------|-----------|
| Q3TYS2     | LES(1)PSER                                                                           | 816.39775 |
| Q8BGU5     | LESYRPDT(0.002)DLS(0.998)R                                                           | 1450.7052 |
| Q8BGU5     | LESYRPDTDLS(1)R                                                                      | 1450.7052 |
| Q8BGU5     | LESYRPDT(0.265)DLS(0.735)R                                                           | 1450.7052 |
| Q8BGC0     | LFDDS(1)DEKEDEEDTDGK                                                                 | 1985.7862 |
| Q8BGC0     | LFDDS(1)DER                                                                          | 995.4196  |
| B2RRX2     | LFEVGG(0.62)PANT(0.38)R                                                              | 1246.6306 |
| Q6PFA7     | LFIGGLS(0.998)FET(0.002)TDDSLR                                                       | 1769.8836 |
| Q6PIF1     | LFSSSS(0.036)S(0.964)PPPAK                                                           | 1203.6136 |
| Q3UY58     | LGAPENSGIS(0.199)T(0.801)LER                                                         | 1442.7365 |
| Q3UY58     | LGAPENSGIS(0.001)T(0.999)LER                                                         | 1442.7365 |
| Q80YA9     | LGDS(1)LQDLR                                                                         | 1178.5932 |
| Q61189     | LGEES(0.039)KEPPS(0.955)DEDEEDNDDIEPIS(0.006)EF<br>R                                 | 3119.3215 |
| Q8BHE3     | LGGAVEDS(0.15)S(0.208)S(0.637)PPS(0.004)T(0.001)LN<br>LSGAHR                         | 2151.0556 |
| B2RQQ5     | LGGDVS(0.922)PT(0.078)QIDVSQFGSFK                                                    | 1980.9793 |
| Q8BK08     | LGPGGGGS(1)R                                                                         | 756.38785 |
| O54825     | LGPGLPQDGS(1)DEEDEEWPTLEK                                                            | 2440.0918 |
| A0A0A0MQC7 | LGS(0.997)EEEVDEDLT(0.433)VDES(0.068)S(0.062)QDS<br>(0.413)PPS(0.026)QAS(0.001)LTPGR | 3273.4644 |
| Q0KL01     | LGSLTPEIVS(0.003)T(0.014)PS(0.063)S(0.921)PEEEDK                                     | 2114.0267 |
| D6RI30     | LGS(1)PAGS(1)PVLGISGR                                                                | 1366.7569 |
| Q3UBL3     | LGSQHS(1)PGR                                                                         | 937.47298 |
| Q3UPB2     | LGS(0.024)S(0.975)PTSSCNPTPTK                                                        | 1532.7141 |
| Q3TYJ0     | LGT(0.001)GGGGGS(0.999)PKDS(0.994)PS(0.006)AQELK                                     | 1784.8905 |
| A0A0R4J119 | LGT(1)PQQAIAR                                                                        | 1166.6772 |
| E9Q663     | LGT(0.001)S(0.999)DGEEER                                                             | 1091.4731 |
| H3BIW0     | LGVSVS(0.999)PS(0.001)R                                                              | 900.50288 |
| Q62277     | LHQVY(1)FDAPSCVK                                                                     | 1562.7551 |
| Q9R1Z7     | LHS(0.985)PS(0.015)LSDEENLR                                                          | 1495.7267 |
| B2RY58     | LIAAEGDAS(1)PGEDR                                                                    | 1399.6579 |
| F7AB82     | LIDLESDADVGEQPGVEGY(0.029)S(0.19)GS(0.776)PAE<br>APPS(0.005)K                        | 3013.404  |
| Q4VBF8     | LIDLES(0.999)PT(0.001)PESQK                                                          | 1455.7457 |
| Q4VBF8     | LIDLES(0.371)PT(0.618)PES(0.011)QK                                                   | 1455.7457 |
| Q924Z4     | LIEDERS(1)DR                                                                         | 1131.552  |
| Q6ZPJ3     | LIHGEDS(1)DS(1)EGDDDGR                                                               | 1715.6871 |
| Q3UDW8     | LINSELGS(0.927)PS(0.073)R                                                            | 1171.6197 |
| F6SMY7     | LISGDAEPT(1)PEQEEK                                                                   | 1641.7734 |
| Q3V0V7     | LKDEHGLEPAS(1)PR                                                                     | 1447.7419 |
| F7AYW2     | LKFS(1)DDEDEEDVVKDGR                                                                 | 1994.9069 |
| Q5DTJ4     | LKFS(1)DEEDGRDS(1)DEEGAEGHK                                                          | 2348.9993 |
| Q8R344     | LKGQEDSLASAVDAT(0.002)T(0.002)GQEACDS(0.997)<br>D                                    | 2467.0657 |

|            |                                                                                    |           |
|------------|------------------------------------------------------------------------------------|-----------|
| M0QWE5     | LKS(0.152)DDS(0.848)DDDTL                                                          | 1222.5201 |
| Q3UXJ3     | LKTEEGEIVY(0.007)S(0.991)AEES(0.002)ENR                                            | 2081.9753 |
| Q9QXZ0     | LLDAEDVDVPS(1)PDEK                                                                 | 1640.7781 |
| E9Q9X1     | LLDPEDVDVS(0.621)S(0.379)PDEK                                                      | 1656.773  |
| Q80TA6     | LLEMMEEVQS(1)LQEK                                                                  | 1705.8267 |
| Q68FH0     | LLGLNELDDLLGKES(0.745)PS(0.255)K                                                   | 1940.0466 |
| Q3TS63     | LLHEDLDES(1)DDDVDEK                                                                | 1885.8065 |
| Q80UU9     | LLKPGEEPSEYT(1)DEEDTK                                                              | 2078.9532 |
| A0A0A6YX02 | LLDPSS(0.038)T(0.933)PT(0.029)K                                                    | 1170.6496 |
| A0A5F8MPN1 | LLLPGSSPS(0.021)S(0.979)PEDEVKDR                                                   | 1924.9742 |
| Q8BSI5     | LLQGS(1)PEQGEAVTR                                                                  | 1483.7631 |
| Q3V3U0     | LLS(1)LVDDEAFIR                                                                    | 1389.7504 |
| D3Z6I8     | LLS(1)NELK                                                                         | 815.47527 |
| Q9Z0R4     | LLS(1)PGTSK                                                                        | 801.45962 |
| P52479     | LLS(1)PTHEK                                                                        | 923.50763 |
| A4FU75     | LLS(1)PVAAASAAR                                                                    | 1125.6506 |
| Q80VE7     | LLWT(0.648)T(0.704)S(0.648)RVLK                                                    | 1215.7339 |
| G3X920     | LLY(0.002)LLQQET(0.75)S(0.75)S(0.75)T(0.75)ELK                                     | 1764.9509 |
| G3UY33     | LMKVQY(1)EEVAEK                                                                    | 1465.7487 |
| Q3UN10     | LNATAS(1)LEQDK                                                                     | 1188.5986 |
| Q6P5F6     | LNETELTDLEAQQES(1)PPK                                                              | 2040.9851 |
| E9PUF4     | LNHS(1)PPQSSSR                                                                     | 1208.5898 |
| Q3UU71     | LNINS(1)S(1)PDEHEPLL                                                               | 1732.8744 |
| O08599     | LNKTDEEIS(0.5)S(0.5)                                                               | 1134.5404 |
| Q5BKS5     | LNQS(0.001)DS(0.031)IEDPNS(0.968)PAGR                                              | 1698.7809 |
| B2RRE3     | LNQSS(1)PDNLDTDK                                                                   | 1431.6842 |
| Q9QXZ0     | LNS(0.999)QES(0.999)DEEPQIS(0.002)DVPHISK                                          | 2251.0604 |
| Q9ER47     | LNT(0.004)AS(0.995)EDNLT(0.001)SLLK                                                | 1517.7937 |
| Q3U3F6     | LPAPQEDTASEAGT(1)PQGEVQTR                                                          | 2281.0822 |
| Q3UJQ2     | LPATSAESESAVIS(1)DGEH                                                              | 1798.8221 |
| Q9Z0R4     | LPEEPS(0.001)S(0.999)EDEQQPEK                                                      | 1740.769  |
| Q6PI72     | LPLPDDHDL(1)DR                                                                     | 1391.6681 |
| Q8BT99     | LPPS(0.976)PT(0.024)R                                                              | 766.43374 |
| Q99P72     | LPS(1)DTEKEDR                                                                      | 1188.5622 |
| F6RK07     | LPS(1)PTPENK                                                                       | 981.51311 |
| E9PV14     | LPSSPAS(1)PS(1)PK                                                                  | 1066.5659 |
| F6Q5V4     | LPSYGLCESGNT(0.003)S(0.007)S(0.292)S(0.698)PPGPR                                   | 2061.9426 |
| E9Q6P5     | LPVSS(0.031)S(0.945)T(0.019)S(0.005)NLHVDR                                         | 1510.774  |
| H3BJU7     | LQDS(0.618)S(0.382)DPDTGSEEEVSSR                                                   | 1936.8134 |
| H3BJU7     | LQDS(0.048)S(0.951)DPDT(0.021)GS(0.345)EEEVS(0.229)S(0.211)RLS(0.142)PPHS(0.053)PR | 2808.2798 |
| D3YXA6     | LQESFQGAPDVIS(1)PR                                                                 | 1642.8315 |
| Q8C051     | LQLY(1)FWKDR                                                                       | 1267.6713 |



|            |                                                                          |           |
|------------|--------------------------------------------------------------------------|-----------|
| A0A5F8MPY3 | LQPQEIS(0.999)PPPT(0.001)ANLDR                                           | 1774.9214 |
| A0A5F8MPY3 | LQPQEIS(0.698)PPPT(0.302)ANLDR                                           | 1774.9214 |
| Q9WV69     | LQS(0.707)T(0.204)EFS(0.032)PS(0.037)GS(0.014)EAGS(0.007)PGLQNGEGQR      | 2519.1524 |
| Q3TES0     | LQTS(0.001)QHS(0.999)PK                                                  | 1024.5302 |
| P48678     | LRLS(0.998)PS(0.288)PT(0.586)S(0.128)QR                                  | 1240.6888 |
| A0A087WSH6 | LRNS(0.999)LDS(0.001)SDSDSAL                                             | 1478.6849 |
| A0A5H1ZRL1 | LRPVS(1)PEEIR                                                            | 1194.6721 |
| G3X957     | LSCS(1)LEDLR                                                             | 1091.5281 |
| Q8CGB3     | LSEAT(0.601)QRY(0.399)AEKK                                               | 1422.7467 |
| Q8CGB3     | LSEAT(0.986)QRY(0.014)AEKK                                               | 1422.7467 |
| Q9DAP4     | LSECS(0.029)S(0.029)NLRRCMT(0.788)VS(0.155)FR                            | 2101.9819 |
| B1ASC0     | LS(1)LDEDEEPK                                                            | 1173.5401 |
| Q8VDN2     | LS(1)LDELHR                                                              | 981.52434 |
| B9EJA2     | LSLGS(1)DDEADLVK                                                         | 1360.6722 |
| D3YYU7     | LMLS(0.989)T(0.011)NCIEK                                                 | 1163.5856 |
| B2RQQ5     | LS(0.158)PAKS(0.789)PS(0.061)LS(0.056)PS(0.067)PPS(0.869)PIEK            | 1918.0411 |
| Q9QZA3     | LS(1)PQGQQPVS(0.998)PQS(0.002)GSPQQQR                                    | 2133.0563 |
| Q9QZA3     | LS(1)PQGQQPVS(1)PQSGSPQQQR                                               | 2133.0563 |
| A2A8V9     | LS(0.114)PS(0.888)AS(0.999)PPR                                           | 910.48723 |
| P48678     | LS(0.015)PS(0.984)PTSQR                                                  | 971.50361 |
| P48678     | LS(0.128)PSPTS(0.872)QR                                                  | 971.50361 |
| Q9QYI5     | LS(1)PSSEEK                                                              | 875.42363 |
| Q80XK6     | LS(1)PSWNPk                                                              | 927.48142 |
| S4R2F3     | LSPVS(0.993)PS(0.007)AK                                                  | 884.49673 |
| S4R2F3     | LSPVS(0.793)PS(0.207)AK                                                  | 884.49673 |
| F8WH48     | LS(1)QSDDEDVIR                                                           | 1160.5673 |
| Q14BY7     | LS(0.103)QS(0.237)S(0.651)LES(0.004)AT(0.005)S(0.001)PSCS                | 1539.6723 |
| Q3TD41     | LSQSSQDS(0.062)S(0.938)PVR                                               | 1289.6212 |
| Q3V386     | LSQSVHHGASSEGS(0.039)LS(0.936)PDT(0.024)R                                | 2050.9668 |
| Q3TB00     | LS(0.002)S(0.018)LT(0.141)APVGEKS(0.791)PDS(0.032)T(0.012)S(0.004)PSYSTR | 2366.1601 |
| Q9QXS6     | LSS(1)PVLHR                                                              | 907.52395 |
| Q99P72     | LS(0.094)T(0.094)EPS(0.811)PEFSNYSEIAK                                   | 1897.8945 |
| A2AJI1     | LSTGS(0.001)ELS(0.999)PK                                                 | 1017.5342 |
| Q80U46     | LST(0.008)S(0.991)PAT(0.001)R                                            | 831.44503 |
| A0A5F8MPE1 | LST(0.001)S(0.999)PVR                                                    | 758.42865 |
| E0CXD7     | LSVQPDT(1)K                                                              | 886.476   |
| Q80TL4     | LTEAPSCSVSISHVGIADS(0.632)S(0.356)PAAS(0.003)S(0.004)S(0.005)K           | 2741.3178 |
| Q3U6K8     | LTFDSSFS(0.999)PNT(0.001)GK                                              | 1399.662  |
| D3YZT5     | LTFDTTFS(0.969)PNT(0.031)GK                                              | 1427.6933 |
| Q6NS65     | LTGPPPS(1)FEGK                                                           | 1128.5815 |

|            |                                                                    |           |
|------------|--------------------------------------------------------------------|-----------|
| A2AMD6     | LTLEGLEEDEDDEDDDKVS(0.753)PT(0.247)VLHK                            | 2711.2661 |
| Q8BX70     | LT(0.5)QAKVS(0.5)EEIQK                                             | 1372.7562 |
| Q9D0I4     | LT(0.018)S(0.649)S(0.333)CPDLPSQSDK                                | 1533.6981 |
| Q8R3A1     | LVEQANS(1)PK                                                       | 984.52401 |
| P58501     | LVREDENDAS(1)DDEDDDEKR                                             | 2263.9313 |
| E9PV14     | LVS(1)PEPPPK                                                       | 962.54368 |
| F6T9T6     | LVSQEHLLES(0.162)S(0.838)PEALR                                     | 1790.989  |
| F6T9T6     | LVS(0.027)QEHLLES(0.973)PEALR                                      | 1790.989  |
| Q3UN10     | LVS(0.869)S(0.13)ESK                                               | 748.39668 |
| S4R1B3     | MAALKAGRGANWS(1)LR                                                 | 1600.862  |
| Q64IP0     | MAGS(1)LPPCVVDCGT(0.665)GY(0.157)T(0.178)K                         | 1911.8529 |
| E9PVX6     | MAS(0.019)S(0.019)AHLVT(0.961)IK                                   | 1156.6274 |
| Q99P72     | MEDIDQS(0.47)S(0.527)LVS(0.003)S(0.001)S(0.003)ADS(0.996)PPRPPPAFK | 2657.2643 |
| A0A0U1RPX0 | MEGAKRADANLLT(0.988)DT(0.989)GT(0.396)ES(0.328)S(0.298)PR          | 2319.1125 |
| F2Z423     | MEIQSGPQPGS(1)PGR                                                  | 1439.6827 |
| Q9ERT9     | MEPDNS(1)PRK                                                       | 1072.4971 |
| Q9Z117     | MEQNKET(1)WKMER                                                    | 1608.7388 |
| Q9Z204     | MES(0.538)EAGADDS(0.462)AEEGDLLDDDDNEDRGD<br>DQLELK                | 3610.4497 |
| Q9Z204     | MES(0.732)EAGADDS(0.268)AEEGDLLDDDDNEDRGD<br>DQLELK                | 3610.4497 |
| V9GXU8     | MET(0.5)NS(0.5)NNFGELQELK                                          | 1752.7989 |
| A0A087WNR0 | MIS(0.109)DKS(0.891)PPR                                            | 1029.5277 |
| Q8BPN8     | MKLDHEL(1)LDR                                                      | 1355.6867 |
| Q61484     | MKMPKFS(0.5)MPT(0.5)LK                                             | 1437.7546 |
| F6R5P4     | MKT(0.606)FT(0.717)S(0.667)AFGT(0.009)MR                           | 1376.6581 |
| A0A171EBL2 | MLMHLVDIY(1)QHR                                                    | 1554.7799 |
| A2A7U0     | MLPAVPGT(1)AVR                                                     | 1110.6219 |
| G3X8Y3     | MPAVS(1)LPPK                                                       | 938.52592 |
| A2ARS6     | MPEKT(1)EK                                                         | 861.4266  |
| Q5FW83     | MS(0.262)IVFT(0.739)RRS(0.999)PR                                   | 1348.7398 |
| E0CYW8     | MS(1)RLILT(1)EEEE                                                  | 1347.7068 |
| P61092     | MS(0.203)RQT(0.33)AT(0.465)ALPT(0.022)GT(0.611)S(0.369)K           | 1548.793  |
| Q1LZK3     | NAELKT(1)QIEELK                                                    | 1414.7668 |
| Q3TYD6     | NAGFTSALLES(1)PQR                                                  | 1489.7525 |
| D6RCX5     | NAS(1)VPNLR                                                        | 869.47191 |
| Q5DTN9     | NAT(1)GLILR                                                        | 856.51305 |
| Q9QXS1     | NDESQLS(1)PATR                                                     | 1216.5684 |
| Q80TN1     | NDGVKES(0.742)S(0.742)ES(0.742)T(0.742)NT(0.022)T(0.009)IEDEDTK    | 2297.9983 |
| P58501     | NDS(1)EEEEER                                                       | 1006.3839 |
| Q8CB99     | NDS(1)GEENVPLDLTR                                                  | 1557.7271 |
| F7BC60     | NDSIVTPS(1)PPQAR                                                   | 1380.6997 |

|            |                                                                |           |
|------------|----------------------------------------------------------------|-----------|
| Q60668     | NEEDEGHS(1)NS(0.174)S(0.826)PR                                 | 1456.5815 |
| Q3UNN4     | NEEPVRS(1)PERR                                                 | 1367.6906 |
| S4R2F3     | NEKLS(1)PVS(0.688)PS(0.312)AK                                  | 1255.6772 |
| Q9Z204     | NEKS(1)EEEQSSASVK                                              | 1550.706  |
| Q5DTN9     | NENVATLS(0.033)VS(0.614)S(0.353)LER                            | 1517.7686 |
| Q9JJA9     | NFTQS(1)PEQQR                                                  | 1233.5738 |
| Q3TQ33     | NFY(0.003)ES(0.997)EEEEEEKEK                                   | 1817.7479 |
| Q3TQ33     | NFYES(1)EEEEEEKEK                                              | 1817.7479 |
| A6H5Y3     | NGSIEERLEY(1)ALVK                                              | 1619.8519 |
| Q9QXW9     | NHPGS(0.054)DT(0.202)S(0.743)PEAEAS(0.275)S(0.726)<br>GGGGVALK | 2123.972  |
| F8SLP9     | NHS(1)LEEEFER                                                  | 1288.5684 |
| E9Q524     | NILVQTPES(0.619)ES(0.24)PQS(0.141)R                            | 1683.8428 |
| Q5U3K5     | NIS(0.999)LS(0.648)S(0.353)EEEAEGLAGHPR                        | 1894.9021 |
| F6W2Q5     | NIT(0.003)GS(0.109)S(0.888)PVADFSAIK                           | 1505.7726 |
| Q3UR53     | NKEES(1)S(1)EDEEKES(1)EEEQPPK                                  | 2376.0089 |
| Q99JF8     | NLAKPGVT(0.001)S(0.008)T(0.52)S(0.619)DS(0.851)EDE<br>DDQEGEK  | 2450.0569 |
| Q99JF8     | NLAKPGVT(0.12)S(0.106)T(0.406)S(0.448)DS(0.921)EDE<br>DDQEGEKK | 2578.1518 |
| Q8BPN8     | NLAS(1)PEGTLATLGLK                                             | 1483.8246 |
| Q3TNV4     | NLEQILNGGES(1)PK                                               | 1397.7151 |
| Q3UZ06     | NLGS(1)INTELQDVQR                                              | 1585.806  |
| Q6PHC0     | NLGT(0.999)PTSSTPR                                             | 1129.5728 |
| A0A0A6YY66 | NLLEDDS(1)DEEEDFFLR                                            | 1984.8538 |
| Q8BGT8     | NLS(1)LEAIQLCDRDGNK                                            | 1844.9051 |
| Q63ZW9     | NLS(1)PGAVESDVR                                                | 1242.6204 |
| Q3UGH4     | NLS(0.999)S(0.001)EEVAR                                        | 1003.4934 |
| G3UZD6     | NNES(0.004)QWKDS(0.979)PLAT(0.017)R                            | 1644.7856 |
| A0A0A6YW54 | NNPS(0.5)QDS(0.5)PCGLPEEGTLSETDR                               | 2402.0292 |
| Q80V79     | NNS(1)FVNEISR                                                  | 1291.6521 |
| Q14AX6     | NNS(1)PAPPQPAPVK                                               | 1315.6884 |
| Q6KCD5     | NNTAADTEDEES(1)DGEDR                                           | 1866.6988 |
| A2A4N9     | NPDGS(1)LS(0.692)QAAMMQS(0.308)ALAK                            | 1818.8604 |
| A0A0A6YY91 | NPPEAATAPAS(1)PK                                               | 1249.6303 |
| H3BJZ1     | NPPPQDY(0.071)ES(0.802)DDES(0.11)Y(0.017)EVLDT<br>EYAR         | 2844.225  |
| G1UCX4     | NPS(0.733)PPPPT(0.47)CGS(0.797)EDEEDLGGGDR                     | 2281.9393 |
| Q5U1V1     | NQEIHLS(1)PIAR                                                 | 1276.6888 |
| Q7TSJ2     | NQS(1)PVVLGPIK                                                 | 1150.671  |
| Q3UZN6     | NSAT(0.001)CHS(0.002)EDS(0.997)DLEID                           | 1691.6581 |
| A0A1D5RM41 | NS(1)DENSSIGR                                                  | 1077.4687 |
| A0A5F8MPN1 | NSDLFT(0.005)VLS(0.995)R                                       | 1150.5982 |
| Q3UNH4     | NSELVS(1)PVKPER                                                | 1353.7252 |
| Q3TUT3     | NSGATADAGS(0.376)IS(0.623)PR                                   | 1302.6164 |

|            |                                                                     |           |
|------------|---------------------------------------------------------------------|-----------|
| Q80U72     | NS(1)LESISSIDR                                                      | 1219.6044 |
| A0A494B8X6 | NSLET(1)VGT(0.005)PDS(0.995)GR                                      | 1331.6317 |
| A0A494B8X6 | NS(0.037)LET(0.799)VGT(0.165)PDS(1)GRGR                             | 1544.7543 |
| Q8C6R5     | NS(1)LPQIPTLNLEAR                                                   | 1564.8573 |
| A0A1W2P6K9 | NS(1)LTGEEGELVK                                                     | 1274.6354 |
| A0A1W2P7T9 | NS(1)PEKEER                                                         | 987.46214 |
| A0A1B0GRX5 | NS(1)PGAVGGLSNAPGTPR                                                | 1550.7801 |
| Q9D898     | NS(1)PINTK                                                          | 772.40792 |
| E9QKG6     | NS(1)PLDCGSASPKN                                                    | 1345.5932 |
| Q8R051     | NS(1)PNNISGISNPPGTPR                                                | 1720.8493 |
| A2A7T3     | NS(0.97)PS(0.03)AASTSSNDSK                                          | 1351.5852 |
| A0A087WRY3 | NSQEDS(1)EDS(1)EEKDVK                                               | 1737.7177 |
| Q5SVI0     | NS(0.001)S(0.907)AIT(0.019)S(0.074)PK                               | 903.46616 |
| Q5SVI0     | NSSAIT(0.671)S(0.329)PK                                             | 903.46616 |
| Q5SVI0     | NSSAIT(1)SPK                                                        | 903.46616 |
| Q5SVI0     | NSSAIT(0.874)S(0.126)PK                                             | 903.46616 |
| Q3UHQ0     | NS(1)S(0.994)GS(0.006)SESSLPNLAR                                    | 1504.7118 |
| Q80TV8     | NSSNTGVGS(1)PSNTIGR                                                 | 1546.7336 |
| Q8K314     | NSS(1)PPPSPKN                                                       | 1023.4985 |
| Q8K3X4     | NS(0.001)S(0.17)S(0.828)PVS(0.001)PASVPGQR                          | 1468.727  |
| Q6ZQ56     | NS(0.003)S(0.997)VQPR                                               | 786.39842 |
| A0A1B0GT26 | NST(0.451)LS(0.549)EEDYIER                                          | 1454.6525 |
| E9Q0A3     | NSVLSDPGLDSPQT(0.561)S(0.439)PVILAR                                 | 2165.1328 |
| A0A1D5RM83 | NS(0.992)WDS(0.008)PAFSNDVIR                                        | 1606.7376 |
| A0A0G2JE71 | NTASLNS(1)R                                                         | 861.43044 |
| E9Q784     | NTEEPS(0.748)S(0.252)PVRK                                           | 1242.6204 |
| Q8BLM1     | NTS(0.001)AS(0.999)DEDER                                            | 1122.4425 |
| Q8BJH1     | NTT(1)PPSLAR                                                        | 955.50869 |
| Q6A018     | NVPGLAAPS(0.005)S(0.973)PT(0.022)QK                                 | 1365.7252 |
| Q9CT07     | NVPQEEES(0.997)LEDS(0.003)DVDADFK                                   | 2035.8858 |
| Q8BXF0     | NVT(0.135)AS(0.865)DEEEGAGLFDSAGK                                   | 1895.8385 |
| Q91XU0     | PAAAAAAGS(0.646)AS(0.354)PR                                         | 1096.5625 |
| Q9QUN9     | PAFVGS(0.001)HDHS(0.996)EES(0.003)QLPR                              | 1891.8813 |
| Q9QUN9     | PAFVGSHDHS(1)EESQLPR                                                | 1891.8813 |
| Q9JKC6     | PAPTVPAAPS(0.018)S(0.976)PDAT(0.005)S(0.001)EPK                     | 1818.9    |
| A2ARP8     | PAS(0.982)PALS(0.004)EGS(0.004)S(0.004)S(0.004)EAT(0.001)TPVISSVAER | 2429.1922 |
| Q3UHX9     | PAS(1)PLSGPR                                                        | 880.47667 |
| Q3UHD3     | PAVS(0.991)S(0.009)PK                                               | 684.38064 |
| Q8BKS6     | PES(0.002)EKPIES(0.998)ENMDAFEKVR                                   | 2105.0099 |
| Q8BKS6     | PESEKPIES(1)ENMDAFEKVR                                              | 2105.0099 |
| A0A5F8MPH8 | PEVLGS(0.11)AADGS(0.89)LIVS(1)LDGLR                                 | 1968.0528 |
| Q04447     | PFS(1)NSHNTQK                                                       | 1158.5418 |

|            |                                                                                                     |           |
|------------|-----------------------------------------------------------------------------------------------------|-----------|
| Q04447     | PFSNSHNTQK                                                                                          | 1158.5418 |
| Q9CQS8     | PGPTPSGTNVGS(0.157)S(0.105)GRS(0.567)PS(0.171)K                                                     | 1768.8704 |
| Q9D2H3     | PGS(1)PVPGSER                                                                                       | 981.48796 |
| Q9D2H3     | PGSPVPGS(1)ER                                                                                       | 981.48796 |
| A0A0G2JGY9 | J                                                                                                   | 2377.1761 |
| S4R2F3     | PGT(0.006)S(0.994)PTR                                                                               | 714.36605 |
| S4R2F3     | PGTS(0.984)PT(0.016)R                                                                               | 714.36605 |
| Q3UI81     | PHPSISEEDEGFDCLS(0.189)S(0.811)PER                                                                  | 2286.9699 |
| O88569     | PHS(1)IDGR                                                                                          | 780.38785 |
| Q8BR92     | PLSDTTEPS(0.017)S(0.983)PEGK                                                                        | 1443.6729 |
| F6RIS8     | PLSGVHEEKT(0.944)LT(0.628)KS(0.428)K                                                                | 1652.9097 |
| Q3UYB4     | PLS(0.013)S(0.987)PPGR                                                                              | 809.43955 |
| Q9CRG8     | PLTS(1)PESLSR                                                                                       | 1085.5717 |
| Q5DTJ4     | PLT(0.006)S(0.994)PLR                                                                               | 782.46504 |
| Q5DTJ4     | PLT(0.016)S(0.984)PLR                                                                               | 782.46504 |
| C9K0Z8     | PLVGPLALGS(1)PR                                                                                     | 1175.7026 |
| Q8K3H0     | PNQAGSEQLVLS(0.002)S(0.002)S(0.002)QS(0.989)EES<br>(0.005)DLGEEGK                                   | 2761.2526 |
| P19246     | PPAEAKS(1)PEK                                                                                       | 1052.5502 |
| Q8R1I3     | PQES(1)DQPT(0.594)S(0.594)QGS(0.459)VT(0.353)K                                                      | 1587.7376 |
| A0A5F8MP96 | PQS(1)PDLCDDDVEFR                                                                                   | 2525.1857 |
| Q3UVJ2     | PQT(0.019)S(0.978)PS(0.003)PK                                                                       | 840.43413 |
| Q3UVJ2     | PQT(0.019)SPS(1)PK                                                                                  | 840.43413 |
| Q8BJY7     | PREIVDAAEDY(1)AK                                                                                    | 1475.7256 |
| A0A0S3CWK3 | PSAPDLS(0.911)PT(0.089)R                                                                            | 1039.5298 |
| A0A0S3CWK3 | PSAPDLS(0.999)PT(0.001)R                                                                            | 1039.5298 |
| C4TGC3     | PSEVPAQS(0.936)PT(0.064)R                                                                           | 1167.5884 |
| E9Q1W7     | PTGLLTVPS(1)PQI                                                                                     | 1221.6969 |
| Q3TRJ1     | PTTQQS(1)PQDEQEK                                                                                    | 1514.6849 |
| Q3ULI5     | PVDS(1)PGDPNQLTR                                                                                    | 1394.679  |
| A4PI84     | PVSPSPSVLS(1)EGR                                                                                    | 1310.683  |
| A4PI84     | PVSPS(1)PSVLSEGR                                                                                    | 1310.683  |
| P06837     | QADVPAAVTDAAAT(0.5)T(0.5)PAAEDAATK                                                                  | 2255.0917 |
| E9QNQ4     | QAEDT(0.202)IS(0.206)NAS(0.328)S(0.123)QLS(0.068)S(<br>0.074)PPT(0.103)S(0.767)PQS(0.097)S(0.032)PR | 2571.2049 |
| P60469     | QAQS(1)PGGVSSEVEVLK                                                                                 | 1613.8261 |
| F7CYX4     | QAQS(1)PSGVSSEVEVLK                                                                                 | 1643.8366 |
| O88737     | QASAT(0.002)APGRES(0.998)PR                                                                         | 1326.664  |
| O88737     | QASATAPGRES(1)PR                                                                                    | 1326.664  |
| E9QMJ1     | QAS(0.803)EDS(0.803)NDLT(0.301)PT(0.093)LPET(0.001<br>)PVPLPR                                       | 2376.1809 |
| S4R2S6     | QAS(1)LDGLQQLR                                                                                      | 1227.6571 |
| E9PW51     | QAS(1)PTEVVER                                                                                       | 1114.5619 |
| A0A140LI84 | QCEGIT(0.019)S(0.966)PEGS(0.015)K                                                                   | 1291.5714 |

|            |                                                              |           |
|------------|--------------------------------------------------------------|-----------|
| Q3UH26     | QDIS(1)PTR                                                   | 815.41373 |
| Q3UH26     | QDIS(0.998)PT(0.002)R                                        | 815.41373 |
| A0A338P6W3 | QDS(1)DEMPFGCIKVK                                            | 1652.7538 |
| A2AHC4     | QDS(0.774)DS(0.226)DVVDVEDTEQDFIGEDHPVVIPR                   | 3154.4215 |
| E9PV45     | QEAEDLSLSAPSSPEIS(0.981)PQS(0.014)S(0.005)PR                 | 2411.1452 |
| Q9QYX7     | QEDSQGS(1)GEDEDFIR                                           | 1710.6969 |
| Q9QYX7     | QEDS(1)QSGGEDEDFIR                                           | 1710.6969 |
| Q3UN28     | QEEEEEEEEERLS(1)R                                            | 1690.7282 |
| A0A494BAF3 | QEEKT(1)KT(1)AEAIQK                                          | 1502.794  |
| A0A3B2W7I6 | QEES(0.363)ES(0.636)PVDRPLTENPPNK                            | 2165.0237 |
| A2ARP8     | QEPEPGPNVEPS(0.072)FT(0.928)PPAVPPR                          | 2241.1066 |
| Q62018     | QESDEDS(0.8)DS(0.2)DQPSR                                     | 1593.6027 |
| Q62018     | QES(0.001)DEDS(0.999)DSDQPSR                                 | 1593.6027 |
| O35691     | QES(1)DPEDDDVKKPALQSSVVATSK                                  | 2572.2504 |
| Q80YA9     | QEV TGSSAVS(1)PIR                                            | 1329.6888 |
| Q80YA9     | QEV TG(1)SAVSPIR                                             | 1329.6888 |
| I7ENE7     | QFLS(0.004)ET(0.121)EKLS(0.875)PEDR                          | 1677.821  |
| Q9EPN1     | QFS(1)PGPR                                                   | 787.39769 |
| Q7M759     | QFVS(1)QELVNL                                                | 1175.6186 |
| D3YYN7     | QGAIVAVTGDGVNDS(1)PALK                                       | 1810.9425 |
| A2AWA9     | QGDETPST(0.005)NNGS(0.994)DDEK                               | 1692.6711 |
| A2AWA9     | QGDETPSTNNGS(1)DDEK                                          | 1692.6711 |
| D6RJ29     | QGDNIS(1)DDEDEV R                                            | 1490.6121 |
| B2RQQ5     | QGF PDRES(0.972)PVS(0.024)DLT(0.003)S(0.001)TGLYQ<br>DK      | 2439.1554 |
| F7CG54     | QGGGDHQIHS(0.533)AS(0.467)DDEIPR                             | 1917.8565 |
| A0A494BAS2 | QGG(1)PDEPDSK                                                | 1115.4731 |
| A0A494BAS2 | QGG(0.974)PDEPDS(0.026)K                                     | 1115.4731 |
| Q9R0L6     | QGLAET(0.002)S(0.758)S(0.239)PVAISLR                         | 1527.8257 |
| Q9QXZ0     | QGS(1)FSEDVISHK                                              | 1332.631  |
| F6TZK4     | QGS(1)PTQSPPADTSFGSR                                         | 1718.786  |
| B2RQQ5     | QGVDDIEKFEDEGAGFEES(0.925)S(0.925)ET(0.141)GD<br>Y(0.008)EEK | 3138.2949 |
| E9PVU7     | QHEVEIPS(0.764)PT(0.236)QK                                   | 1391.7045 |
| E9PVU7     | QHEVEIPS(0.864)PT(0.136)QK                                   | 1391.7045 |
| A2A690     | QIAS(0.042)DS(0.959)PHAS(0.999)PK                            | 1236.6099 |
| Q3TUU1     | QIS(1)EDVDGPDNR                                              | 1343.5953 |
| Q3UR37     | QKS(1)PEIHR                                                  | 993.53558 |
| B1AU60     | QLAVELQS(0.591)RS(0.737)T(0.673)MQK                          | 1617.8508 |
| Q8BPN8     | QLDHES(1)DDADREDEER                                          | 1957.7886 |
| Q6P9L5     | QLDT(1)Y(1)APFPGKK                                           | 1363.7136 |
| Q80T68     | QLHIEGAS(1)LELS(0.97)DDDT(0.025)ES(0.005)K                   | 2085.9702 |
| P08553     | QLS(1)DIEER                                                  | 988.48254 |
| E9Q9X1     | QLS(1)LLDSR                                                  | 930.51345 |

|            |                                                                                             |           |
|------------|---------------------------------------------------------------------------------------------|-----------|
| E9Q9X1     | QLS(0.999)LLDS(0.001)R                                                                      | 930.51345 |
| Q5RL55     | QLS(0.5)VPAS(0.5)DEEDEVPAPIPR                                                               | 2048.0062 |
| B1AWC8     | QNDVEIPS(0.95)PT(0.05)QK                                                                    | 1354.6729 |
| E0CZF8     | QNS(1)DPTSENPPLPTR                                                                          | 1651.7802 |
| Q8BXR1     | QNSEALIANDELDCS(1)PE                                                                        | 1903.8106 |
| Q3UHH0     | QNS(0.032)S(0.968)PPSSLNK                                                                   | 1157.5677 |
| Q91VC7     | QPGFPQSPS(0.001)DDPS(0.787)LS(0.212)PR                                                      | 1907.9014 |
| B2RQQ5     | QPGIQS(1)PSR                                                                                | 968.50394 |
| A0A0U1RPR0 | QPLLS(1)EDEEDTKR                                                                            | 1671.8315 |
| A0A0U1RPR0 | QPLLS(0.967)EDEEDT(0.033)KR                                                                 | 1671.8315 |
| Q9WV69     | QPLT(0.3)S(0.698)PGS(0.001)VSSSR                                                            | 1301.6575 |
| A0A087WNU5 | QPPS(0.116)PQGS(0.564)PEDDT(0.319)LEQVSFLDSSGK                                              | 2644.214  |
| O88935     | QPQRDAS(1)PGR                                                                               | 1110.553  |
| Q62048     | QPS(1)EEEEIK                                                                                | 1071.5448 |
| E9PVB7     | QPTVAS(0.002)S(0.005)AES(0.994)DEENR                                                        | 1618.7071 |
| Q8JZR7     | QPWAEPEEMS(1)EEK                                                                            | 1588.6715 |
| Q8BN38     | QQAS(0.001)S(0.009)DS(0.595)PCS(0.396)LR                                                    | 1334.5885 |
| A0A668KM74 | QQEEAQAAAAAAS(0.993)AES(0.007)R                                                             | 1687.7762 |
| Q05C56     | QQGLDDAEQGS(0.375)LS(0.409)DDAAS(0.101)VS(0.109)QIQS(0.019)QT(0.047)QS(0.904)PQS(0.036)VPER | 3685.6939 |
| E9QAF9     | QQGPPAPANDS(1)DNEEDAPASSLK                                                                  | 2434.0884 |
| A0A0G2JGY9 | QQGVLQS(0.876)S(0.124)PK                                                                    | 1070.572  |
| A0A3B2WBH9 | QQLAAHS(1)KR                                                                                | 1037.573  |
| E9QKK4     | QQLQRS(0.524)KQS(0.768)S(0.707)R                                                            | 1344.7222 |
| D3Z4K9     | QQS(1)EEDVLR                                                                                | 1102.5255 |
| Q5DTJ4     | QRGS(0.753)ET(0.204)GS(0.04)ET(0.002)HESDLAPSDK                                             | 2129.9461 |
| B7ZWK9     | QSAGPNS(0.993)PT(0.006)GGGGGGSGGTR                                                          | 1714.7619 |
| B7ZWK9     | QSAGPNS(0.999)PT(0.001)GGGGGGSGGTR                                                          | 1714.7619 |
| Q8BTI8     | QSCS(0.001)GS(0.83)S(0.169)PR                                                               | 964.40324 |
| S4R2T7     | QS(0.636)DS(0.365)NAS(0.999)FLR                                                             | 1123.5258 |
| Q61687     | QSEES(1)PADDGELR                                                                            | 1431.6114 |
| Q8BWK1     | QSELSAEES(1)PEK                                                                             | 1332.6045 |
| Q8K3W3     | QS(1)GDGQESTEPVENK                                                                          | 1603.6962 |
| E9Q9Q7     | QSLGES(1)PR                                                                                 | 872.43519 |
| F6YCJ0     | QS(0.004)LS(0.498)S(0.498)ADNLEPDVQGHQVAAR                                                  | 2221.0723 |
| Q99JF8     | QS(0.055)NAS(0.979)S(0.966)DVEVEEK                                                          | 1420.6318 |
| Q5DTY9     | QS(0.998)PDEFCHS(0.002)DFEDASQGS DTR                                                        | 2413.9353 |
| Q921F2     | QS(1)PDEPLR                                                                                 | 940.46141 |
| G3X9K3     | QS(1)PPHGAEK                                                                                | 949.46174 |
| D3YTP3     | QS(1)PQLLPR                                                                                 | 937.53451 |
| A2A8V9     | QS(1)PSPSTR                                                                                 | 858.41954 |
| A2A8V9     | QSPS(1)PSTR                                                                                 | 858.41954 |
| A2A8V9     | QSPSPS(1)TR                                                                                 | 858.41954 |

|            |                                                                  |           |
|------------|------------------------------------------------------------------|-----------|
| Q3TB96     | QSQIQVFEDGADT(0.044)T(0.051)S(0.899)PET(0.006)PD<br>SSASK        | 2624.1726 |
| A0A0R4J1Y6 | QSS(1)CESITDEFSR                                                 | 1544.6413 |
| S4R1C4     | QS(0.128)S(0.87)VT(0.002)SQSQDVASLS(0.099)S(0.757)<br>PS(0.144)R | 1949.929  |
| E9QLQ9     | QSVGS(0.023)GS(0.977)PVQTVGLETR                                  | 1700.8693 |
| D3YYR9     | QSYGESPQLLS(0.97)PT(0.029)PT(0.001)EGDQDDR                       | 2419.0775 |
| B1AXS4     | QT(1)IIRPPVR                                                     | 1078.6611 |
| A0A3B2WBH9 | QTLINIPALNDS(1)DS(1)EVEDISEIESNR                                 | 2900.3887 |
| A0A1W2P6P4 | QTLPS(0.012)S(0.891)PT(0.076)T(0.015)T(0.006)K                   | 1159.6085 |
| Q91ZA5     | QTPQAPQS(1)PR                                                    | 1108.5625 |
| D3YWB4     | QT(0.003)S(0.997)IETDR                                           | 948.45124 |
| F7A043     | QTS(0.001)S(0.008)S(0.992)PEGCGVEIK                              | 1477.6719 |
| A0A5F8MPF3 | QVGVFS(1)PAR                                                     | 959.51886 |
| Q61301     | QVQEAIAGIS(0.001)S(0.002)AAQAT(0.28)S(0.531)PT(0.<br>187)DEAK    | 2272.1183 |
| Q3TQI7     | RADS(1)ESEEDEQESEEV                                              | 2022.825  |
| Q3TQI7     | RADSES(1)EEDEQESEEV                                              | 2022.825  |
| E0CXA0     | RAGDVLEDS(1)PK                                                   | 1185.599  |
| F6Q8D3     | RAS(0.737)DS(0.263)LSAR                                          | 961.49411 |
| F6Q8D3     | RAS(0.832)DS(0.168)LSAR                                          | 961.49411 |
| F6Q8D3     | RAS(0.619)DS(0.381)LSAR                                          | 961.49411 |
| Q8R4E6     | RAS(1)GEEQECLD                                                   | 1292.5303 |
| D3Z1Z8     | RAS(1)GQAFELILS(1)PR                                             | 1543.8471 |
| A5CVE4     | RAS(0.983)GS(0.017)AGAAASPSAAAAGER                               | 1714.8347 |
| A2A8V9     | RAS(1)PS(1)PPPKR                                                 | 1091.62   |
| F6TZK4     | RAS(0.942)QS(0.477)S(0.534)LES(0.035)S(0.009)S(0.002)<br>GPPCIR  | 1817.869  |
| F6TZK4     | RAS(0.842)QS(0.477)S(0.634)LES(0.035)S(0.013)SGPPCI<br>R         | 1817.869  |
| F6TZK4     | RAS(0.942)QS(0.377)S(0.534)LES(0.035)S(0.109)S(0.002)<br>GPPCIR  | 1817.869  |
| P31324     | RAS(1)VCAEAYNPDEEEDDAESR                                         | 2411.9772 |
| Q9QYX7     | RAS(0.896)YDS(0.104)VEDSSESENS(1)PVAR                            | 2183.9567 |
| A0A1B0GR85 | RDES(1)DEEPPRVER                                                 | 1612.7441 |
| Q05DI3     | RDPS(1)LEEIQK                                                    | 1213.6303 |
| C9K0Z8     | RDS(0.996)AS(0.996)PGAAS(0.008)GLDPLDSAR                         | 1841.8868 |
| Q5SSM3     | RDS(1)EEESESTAL                                                  | 1351.5739 |
| Q5SSM3     | RDSEEESES(1)TAL                                                  | 1351.5739 |
| A0A2R8W6N3 | RDS(1)ETEVEELR                                                   | 1361.6423 |
| A0A5F8MQ17 | RDS(1)LDLASDFLPIK                                                | 1685.8988 |
| Q3UXP3     | RDS(1)LEEGELR                                                    | 1202.5891 |
| A2A699     | RDS(0.333)LT(0.333)S(0.333)PEDELGAEVGDEAGDK                      | 2289.0244 |
| A2A699     | RDS(0.95)LT(0.569)S(0.481)PEDELGAEVGDEAGDKK                      | 2417.1194 |
| P28028     | RDS(0.984)S(0.016)DDWEIPDGQITVGQR                                | 2173.0036 |
| Q0VAW6     | RDS(0.891)S(0.87)ES(0.239)QLASTESDKPTTGR                         | 2151.004  |



|            |                                                                             |           |
|------------|-----------------------------------------------------------------------------|-----------|
| Q0VAW6     | RDS(0.36)S(0.409)ES(0.231)QLAS(0.204)T(0.679)ES(0.113)DKPT(0.002)T(0.002)GR | 2151.004  |
| Q3UWI3     | RDS(1)VGGEGDR                                                               | 1046.4741 |
| P11881     | RDS(1)VLAASR                                                                | 973.53049 |
| E9PV14     | REDDAES(1)GGR                                                               | 1090.4639 |
| Q6PB44     | REEGEAVEAGDT(1)PEELR                                                        | 1885.8654 |
| Q8BTI8     | REIS(0.816)S(0.676)S(0.356)PT(0.003)S(0.149)K                               | 1090.5619 |
| A2AGR1     | REPS(0.803)S(0.197)PQGR                                                     | 1012.505  |
| A2AGR1     | REPS(1)SPQGR                                                                | 1012.505  |
| A1A4C2     | RES(1)DESGESAPEEGEGAR                                                       | 1947.8042 |
| Q3TRJ1     | RES(0.998)PES(0.002)EGPIYEGLIL                                              | 1787.8941 |
| Q3TRJ1     | RES(1)PESEGPYIEGLIL                                                         | 1787.8941 |
| Q3TRJ1     | RES(0.785)PES(0.215)EGPIYEGLIL                                              | 1787.8941 |
| A0A3B2WCD2 | RES(1)PGEWGADVPR                                                            | 1454.6902 |
| A0A5F8MPF2 | RES(1)PPSAER                                                                | 1027.5047 |
| A2A8V9     | RES(1)PSPAPK                                                                | 967.50869 |
| A2A8V9     | RESPS(1)PAPK                                                                | 967.50869 |
| Q99K30     | RES(1)QDEEPR                                                                | 1144.5109 |
| Q9CQG9     | RES(0.99)QT(0.01)ALVVNQR                                                    | 1399.7532 |
| Q9CQG9     | RES(0.257)QT(0.743)ALVVNQR                                                  | 1399.7532 |
| B2RQQ5     | RES(1)VVS(1)GDDR                                                            | 1118.5316 |
| Q69ZX8     | RFS(0.998)S(0.002)GGEEDFDR                                                  | 1529.6383 |
| A2A8V9     | RGAS(1)AS(1)PQGR                                                            | 985.50534 |
| Q9D6K2     | RGFS(1)EEQLR                                                                | 1120.5625 |
| O35295     | RGGGS(1)GGGDES(1)EGEEVDED                                                   | 1836.6882 |
| Q5SXA5     | RGIEFPMADLDALS(0.981)PIHT(0.019)PQR                                         | 2363.2056 |
| Q5SXA5     | RGIEFPMADLDALS(1)PIHTPQR                                                    | 2363.2056 |
| P60469     | RGS(1)ALGPDEAGGELER                                                         | 1612.7805 |
| Q7TPM6     | RGS(0.825)AT(0.165)S(0.009)S(0.001)SNTSLT                                   | 1267.6004 |
| Q9QXZ0     | RGS(0.787)DAS(0.211)DFDLLET(0.001)QSACSDTSESS<br>AAGGQGSSR                  | 3335.408  |
| Q9QXZ0     | RGS(0.999)DASDFDLLET(0.001)QSACSDTSESSAAGG<br>QGSSR                         | 3335.408  |
| B1AQX6     | RGS(1)DELTVPR                                                               | 1128.5887 |
| Q2NKI4     | RGS(1)DELYAIK                                                               | 1150.5982 |
| Q8CC95     | RGS(0.969)DT(0.031)DVR                                                      | 904.43626 |
| Q8CC95     | RGS(0.798)DT(0.202)DVR                                                      | 904.43626 |
| Q9D4F2     | RGS(0.878)FPLAAS(0.122)GPAQAAPAPPEDAR                                       | 2330.1767 |
| A0A0G2JEF6 | RGS(0.995)GDT(0.003)S(0.001)S(0.001)LIDPDTLSSELR                            | 2105.0237 |
| A0A0G2JEF6 | RGS(1)GDTSSLIDPDTLSSELR                                                     | 2105.0237 |
| E9Q6I9     | RGS(0.5)GS(0.5)AEGEVEASQLR                                                  | 1631.7863 |
| Q99P72     | RGS(0.787)GS(0.787)VDET(0.426)LFALPAASEPVIPSSA<br>EK                        | 2714.3763 |
| E3VVQ8     | RGS(1)LELGNPSAAHLGDELK                                                      | 1963.0123 |
| G5E8J9     | RGS(0.921)LT(0.079)LEEK                                                     | 1031.5611 |

|            |                                                    |           |
|------------|----------------------------------------------------|-----------|
| A2AIS0     | RGS(1)PEEATER                                      | 1130.5316 |
| Q3TDM2     | RGS(1)QESELR                                       | 1060.5261 |
| D9J303     | RGS(1)QGDIK                                        | 859.45118 |
| A0A0N4SVB5 | RGS(1)QPDAELDGAGTSLLR                              | 1841.9232 |
| B7ZNA3     | RGS(0.995)S(0.971)PGS(0.035)LEIPK                  | 1226.6619 |
| Q80TL4     | RGT(1)VEGSVQEVQEEK                                 | 1673.822  |
| Q80TL4     | RGT(1)VEGS(1)VQEVQEEK                              | 1673.822  |
| Q80TL4     | RGT(0.5)VEGS(0.5)VQEVQEEK                          | 1673.822  |
| Q3KQQ1     | RHS(1)GQDVHVVLK                                    | 1373.7528 |
| Q3UGY7     | RHS(0.996)T(0.004)EGEEGDVSDVGSR                    | 1815.7983 |
| B2RW11     | RHS(0.802)T(0.198)EGPEDPPPWAEK                     | 1831.8489 |
| B3Y5T0     | RIS(0.98)ET(0.019)S(0.001)EDQTLVDR                 | 1647.8064 |
| A0A0S3CWK3 | S(1)EPAVGPLR                                       | 1208.699  |
| A0A087WSB8 | RKS(1)PENTEGK                                      | 1144.5836 |
| E9Q9P4     | RLEDEQPPTLS(1)PK                                   | 1508.7835 |
| Q3V159     | RLETEDTSGS(0.999)PSR                               | 1433.6746 |
| E9PV14     | RLPS(0.001)S(0.002)PAS(0.998)PS(1)PK               | 1222.667  |
| Q921Q7     | RLS(1)ADGSLGR                                      | 1030.552  |
| A0A5F8MPE1 | RLS(0.984)ES(0.016)LAPIK                           | 1112.6554 |
| Q91XU0     | RLS(0.904)ES(0.06)S(0.036)ALK                      | 989.55056 |
| Q9ER47     | RLS(1)FESEGEKDFSK                                  | 1657.7948 |
| Q3URG1     | RLS(1)LES(1)EGANEGATAAPELSALEEAFR                  | 2817.3781 |
| Q3UN16     | RLS(0.996)LGS(0.004)PDSR                           | 1086.5782 |
| Q920R0     | RLS(1)LPGLLS(0.007)QVS(0.993)PR                    | 1521.8991 |
| A2A8V9     | RLS(1)PS(0.519)AS(0.481)PPR                        | 1066.5883 |
| P05063     | RLS(1)QIGVENTEENR                                  | 1643.8227 |
| Q3UHD3     | RLS(0.5)RT(0.5)NEELLWK                             | 1543.8471 |
| A0A338P6W3 | RNS(0.539)DS(0.461)AGPFAVPDHLR                     | 1737.8547 |
| Q91XU0     | RPAAAAAAGSAS(1)PR                                  | 1252.6636 |
| F7A063     | RPAS(1)GDDLSAK                                     | 1115.5571 |
| Q8CCJ4     | RPDS(1)PGQDASR                                     | 1184.5534 |
| Q8CI75     | RPGLEKAS(1)DEEPED                                  | 1570.7111 |
| H3BIW0     | RPLS(1)PQSK                                        | 911.51886 |
| Q3TV86     | RPNEDS(1)DEDEEK                                    | 1461.5856 |
| Q3TQP0     | RPPES(1)PPIVEEWSR                                  | 1791.8904 |
| Q62261     | RPPS(1)PDPNTK                                      | 1107.5673 |
| A0A1D5RM58 | RPPS(1)PDVIVLS(0.902)DS(0.107)EQPS(0.521)S(0.47)PR | 2162.0968 |
| Q6IR43     | RPS(1)ES(1)DKEEELDK                                | 1560.7267 |
| Q8VDP4     | RPS(0.508)S(0.492)GGEEEEK                          | 1203.5368 |
| D6RJ71     | RPS(0.786)S(0.214)PAPGPSR                          | 1107.5785 |
| D6RJ71     | RPS(0.686)S(0.314)PAPGPSR                          | 1107.5785 |
| E9Q6E5     | RPTEAVS(1)PK                                       | 983.53999 |

|            |                                                                          |           |
|------------|--------------------------------------------------------------------------|-----------|
| A0A1W2P8E9 | RQES(0.561)GS(0.218)S(0.218)LEPPS(0.002)GLALEDGA<br>HVL R                | 2504.2619 |
| Q8BTI8     | RQPS(1)PQPSPR                                                            | 1148.6051 |
| D3Z3A8     | RQS(0.971)GT(0.029)DLQEDVIVR                                             | 1614.8325 |
| F7BQ55     | RQS(1)IPEEFR                                                             | 1160.5938 |
| A0A5F8MPE1 | RQS(1)PEEDDTQK                                                           | 1331.5953 |
| S4R1C4     | RQS(0.64)S(0.353)VT(0.007)SQSQDVAS(0.016)LS(0.249)<br>S(0.726)PS(0.009)R | 2106.0301 |
| B2RUG7     | RRDS(1)DGVDGF EAEGK                                                      | 1636.7441 |
| A2A8V9     | RRT(1)PS(1)PPPR                                                          | 1062.6047 |
| E9PV14     | S(1)EAEEGEVRT(0.999)PT(0.001)K                                           | 1587.7853 |
| Q8K2P7     | S(0.988)LT(0.012)NSHLEK                                                  | 1183.6309 |
| Q8BUT2     | RS(1)PPPS(0.973)PT(0.021)T(0.006)QR                                      | 1222.6418 |
| B7ZBV7     | RS(0.792)PS(0.208)ADQSLDDSPSK                                            | 1588.7329 |
| A2A8V9     | RS(0.918)PS(0.081)LSSK                                                   | 860.47158 |
| Q99M28     | RS(0.992)PS(0.829)PKPT(0.179)K                                           | 996.57163 |
| A2A8V9     | RS(1)PS(1)PPPAR                                                          | 963.52501 |
| Q3USW3     | RS(0.372)PT(0.628)HEMNPR                                                 | 1223.5829 |
| Q8CIP4     | RS(0.892)PT(0.094)S(0.007)T(0.007)GDT(0.001)ELK                          | 1290.6416 |
| B2RXW8     | S(0.164)S(0.835)DGS(0.001)LSHEDLAK                                       | 1500.7168 |
| E0CX50     | RS(0.066)S(0.895)DT(0.04)EEESR                                           | 1194.5113 |
| Q3UN16     | RS(0.095)S(0.905)LDGSESAK                                                | 1135.5469 |
| Q3UN16     | RS(0.015)S(0.985)LDGSESAK                                                | 1135.5469 |
| Q8CDV2     | RS(0.033)S(0.956)LNS(0.011)INSSDAK                                       | 1377.6848 |
| Q9R0L6     | RS(1)S(1)LVDEAPEDEEF EQK                                                 | 2006.9069 |
| A0A5F8MPK0 | RS(0.651)S(0.349)LVITTK                                                  | 1003.6026 |
| A2AJI1     | RS(0.219)S(0.762)QPS(0.019)PTTVPASDSPPAK                                 | 1908.9541 |
| Q8BTI8     | RS(0.023)S(0.976)RS(0.666)S(0.332)PELT(0.003)R                           | 1274.6691 |
| Q8BTI8     | RS(0.986)S(0.947)S(0.055)ELS(0.012)PEVVEK                                | 1445.7362 |
| F7CGP0     | RS(0.093)S(0.908)S(0.999)PAELELK                                         | 1215.6459 |
| A0A2I3BRL8 | RS(0.5)T(0.5)PSGPVR                                                      | 955.51993 |
| Q3UGH4     | RS(0.641)T(0.358)PTPELTSK                                                | 1215.6459 |
| H3BJZ0     | RTNS(0.996)S(0.004)EQER                                                  | 1105.5112 |
| Q80U23     | RT(0.093)S(0.907)PPVSVR                                                  | 997.56688 |
| Q3UHB8     | RT(0.045)S(0.97)PS(0.985)PPAR                                            | 967.51993 |
| P54731     | RT(0.5)S(0.5)PVQTR                                                       | 943.51993 |
| Q8CI08     | RT(0.007)S(0.958)S(0.036)EDLR                                            | 962.47812 |
| Q8BN01     | RT(0.091)S(0.76)T(0.149)QENVHLSQAK                                       | 1597.8172 |
| A2A9P8     | RVS(1)ADGQPFQR                                                           | 1259.6371 |
| Q3U2I0     | RVS(1)GDGAQDLDR                                                          | 1287.6167 |
| A2A8V9     | RVS(1)HS(1)PPPK                                                          | 1003.5563 |
| F8VQK5     | RVS(1)QDL DVEKPDASPTSLQLR                                                | 2353.2238 |
| F6WJB7     | RVS(0.981)S(0.921)DEEHT(0.098)VDS(0.001)CIGDIK                           | 2045.9324 |
| A0A3Q4EIA3 | RVS(0.988)S(0.012)GSCFALE                                                | 1211.5605 |

|            |                                                                 |           |
|------------|-----------------------------------------------------------------|-----------|
| A0A0A6YX73 | RVS(1)VCAETFPDEEEEDNDPR                                         | 2507.0507 |
| Q3ULT0     | RY(1)VENQPLGK                                                   | 1202.6408 |
| P56399     | S(1)AAES(0.995)IS(0.005)ESVPVGPK                                | 1456.7409 |
| Q8BI72     | SAAQQENS(0.032)S(0.808)PS(0.16)R                                | 1260.5695 |
| H9KV01     | SAAS(1)PVVISIPER                                                | 1324.7351 |
| P70441     | S(1)ADAAAGEPLPR                                                 | 1153.5728 |
| A2APL8     | S(0.999)ADCS(0.001)VEEEPWKR                                     | 1591.6937 |
| Q9ESN6     | S(1)ADVS(0.998)PT(0.002)TEGVK                                   | 1189.5826 |
| Q9ESN6     | S(1)ADVS(1)PTTEGVKR                                             | 1345.6838 |
| F8VQ11     | S(1)AEALGPGALVSPR                                               | 1323.7147 |
| D3Z5T2     | S(1)AEDLTDGSYDDILNAEQLKK                                        | 2324.102  |
| B1AQD9     | S(0.001)AEPT(0.004)REPGAEAES(0.825)GS(0.825)ES(0.345)EPEPGGPR   | 2706.2005 |
| A0A286YCI8 | S(1)AESLLESTK                                                   | 1063.5397 |
| Q5PRF0     | SAEVDDGAS(1)EK                                                  | 1106.4728 |
| Q9Z0R4     | SAFTPATAT(0.002)GS(0.013)S(0.01)PS(0.974)PVLGQGEK               | 2089.0328 |
| Q2KHK7     | S(1)AGGAVPPPPNPAVSFPAPR                                         | 1884.9846 |
| Q3TXY0     | SAGRPDAVGLPCPGGSEDASDVSEPS(0.001)GS(0.001)AVS(0.22)S(0.777)PGDR | 3527.5707 |
| A0A3B2WCL5 | SAGS(0.065)S(0.407)S(0.527)PEAGEDS(1)DHEDGNYCPVK                | 2591.0354 |
| P61264     | S(1)AKDS(1)DDEEEVVHVDR                                          | 1828.8075 |
| Q80VM8     | SALPAADSPGNLEDS(1)DQDGGPENPAK                                   | 2551.131  |
| Q9ERR1     | S(1)APSS(1)PTLDCEK                                              | 1290.5762 |
| P16054     | S(1)APT(0.001)S(0.999)PCDQELK                                   | 1331.6027 |
| F6Z1P8     | S(0.002)AQDGNNAS(0.717)PS(0.208)HT(0.065)AS(0.008)QPNAPQDPK     | 2418.0796 |
| Q8BGU5     | SAS(1)ADNLILPR                                                  | 1155.6248 |
| B7ZNF6     | S(0.008)AS(0.992)APAS(1)PR                                      | 842.42463 |
| Q99N73     | SAS(1)EPSLHR                                                    | 982.48321 |
| P28028     | SAS(1)EPSLNR                                                    | 959.46722 |
| D6RI64     | S(0.166)AS(0.834)PDDDLGSSNWEAADLGNEER                           | 2434.0157 |
| A2BE92     | SAS(1)PGLPK                                                     | 755.41775 |
| Q5U4C3     | S(1)AS(1)PGPPPAR                                                | 935.48248 |
| D3Z1F6     | SAS(1)PSNIK                                                     | 802.41848 |
| Q6PA03     | S(0.005)AS(0.993)QS(0.05)S(0.952)LDKLDQELK                      | 1647.8315 |
| P70441     | SASSDTSEELNSQDS(1)PKR                                           | 1936.861  |
| Q9DD18     | S(0.75)AS(0.698)S(0.552)GAEGDVSSER                              | 1337.5695 |
| Q9DD18     | S(0.006)AS(0.993)S(0.001)GAEGDVS(0.931)S(0.069)EREP             | 1563.6649 |
| Q9JKC6     | SAS(0.112)S(0.888)PKPDTK                                        | 1016.5138 |
| Q9JKC6     | S(0.025)AS(0.526)S(0.433)PKPDT(0.016)KVPQATAEAK                 | 1911.9902 |
| Q8BTI8     | SAS(0.015)S(0.988)S(0.997)PEIR                                  | 932.45632 |
| E9Q9D6     | SAS(0.987)T(0.013)DLGTADVVLGR                                   | 1460.7471 |

|            |                                                                        |           |
|------------|------------------------------------------------------------------------|-----------|
| Q3UH26     | S(0.64)AS(0.64)T(0.472)ES(0.121)GFHNHT(0.121)DT(0.006)AEGDVLAAAR       | 2443.1    |
| A0A140LHI9 | SAS(1)TGAQTFQSADAR                                                     | 1496.6855 |
| Q8VDN4     | SAT(0.037)GQHS(0.963)PAR                                               | 1010.4894 |
| A0A0A6YW88 | S(1)AT(1)PATDGR                                                        | 874.41446 |
| Q3U931     | S(0.5)AT(0.5)PPPAEPASLPQEPPK                                           | 1812.9258 |
| Q3U931     | S(0.074)AT(0.926)PPPAEPASLPQEPPK                                       | 1812.9258 |
| A0A087WSE3 | S(0.985)AT(0.013)S(0.002)DLELR                                         | 990.49819 |
| Q3UR37     | SATSGDIWPGLSAYDNS(1)PR                                                 | 1992.9177 |
| B7ZNA3     | SATTT(0.003)GS(0.986)PGT(0.011)EK                                      | 1135.5357 |
| Q3UHJ0     | SAT(0.025)T(0.187)T(0.072)PS(0.077)GS(0.639)PR                         | 1060.5149 |
| Q3UHJ0     | SAT(0.009)T(0.929)T(0.048)PS(0.005)GS(0.009)PR                         | 1060.5149 |
| Q8BTI8     | SAVRPS(1)PS(1)PER                                                      | 1181.6153 |
| F8VQ11     | S(1)CDDGLNTR                                                           | 1183.4928 |
| Q6PDZ4     | S(1)CDLAGVETCK                                                         | 1238.5271 |
| E9Q4D5     | S(1)CHDLSVL                                                            | 929.42767 |
| Q9Z140     | SCS(0.002)S(0.998)PVFSR                                                | 1025.46   |
| Q91XV3     | S(0.002)DAAPAAS(0.46)DS(0.532)KPS(0.193)S(0.747)AEPAPS(0.032)S(0.034)K | 2056.9549 |
| Q3U6E4     | S(1)DAAVDTSSEITTK                                                      | 1423.6678 |
| Q5SUC3     | S(1)DAEEDGVTGS(1)QDEEDSKPK                                             | 2121.8822 |
| Q5SUC3     | SDAEEDGVT(0.861)GS(0.139)QDEEDSKPK                                     | 2121.8822 |
| Q5SUC3     | SDAEEDGVT(1)GSQDEEDSKPK                                                | 2121.8822 |
| Q8BPN8     | S(1)DAFLSK                                                             | 766.38612 |
| Q8BPS5     | SDANTDLIGGS(1)PK                                                       | 1273.615  |
| B2FDH7     | S(1)DDESPSTSSGSSDADQR                                                  | 1826.7038 |
| A0A0A6YW88 | SDDIAS(1)ADR                                                           | 948.41485 |
| A0A2X0SSA9 | S(0.012)DDS(0.191)KS(0.644)S(0.576)S(0.576)PEPVT(0.001)HLK             | 1712.8217 |
| Q6PNC0     | S(1)DEELDDGVDDLK                                                       | 1448.6155 |
| Q8BQY0     | S(1)DESLPDGLSPK                                                        | 1243.5932 |
| A0A140LJ08 | S(1)DFDEFER                                                            | 1043.4196 |
| Q3TD71     | S(0.933)DFDS(0.067)NPFADPDLNPNFKDPSVTQVTR                              | 3022.3945 |
| Q8BJC1     | SDFS(1)DLEQSVK                                                         | 1253.5776 |
| Q3UH26     | S(1)DGESDSPEK                                                          | 1049.4149 |
| Q3UH26     | S(0.001)DGES(0.553)DS(0.446)PEKEAEFAPYPR                               | 2109.9127 |
| Q9R0L6     | S(0.999)DGS(0.001)ENLCTPQQR                                            | 1577.674  |
| Q8C5F9     | SDGS(1)LDDGDIHR                                                        | 1342.5749 |
| Q6PHC0     | S(0.001)DIS(0.533)ERPS(0.466)VDDVESETGSTGALETR                         | 2636.2049 |
| B2RQQ5     | S(1)DIS(1)PLT(1)PR                                                     | 984.52401 |
| A0A5F8MPC5 | SDKENDPEHDES(1)DNEVLGK                                                 | 2155.9142 |
| P52479     | SDLIEDEELED(0.003)GKGS(0.997)EDEWEQVGPK                                | 2933.2938 |
| A7YQ68     | S(1)DNALHLASER                                                         | 1211.5895 |
| Q8CIN4     | S(1)DNGELEDKPPAPPVR                                                    | 1719.8428 |

|            |                                                       |           |
|------------|-------------------------------------------------------|-----------|
| P08553     | S(1)DQAEEGGS(1)EK                                     | 1135.4629 |
| Q8BT45     | S(1)DQEAKPSTEDLGDK                                    | 1618.7322 |
| A2ACC7     | S(0.004)DS(0.996)APPTPVNR                             | 1139.5571 |
| A2ACC7     | S(0.001)DS(0.999)APPTPVNR                             | 1139.5571 |
| D3Z5I4     | S(0.281)DS(0.714)CS(0.004)DFTAILPDKPNR                | 1921.884  |
| Q6NXJ0     | SDS(1)DSSTLAK                                         | 1009.4564 |
| E9PVU7     | SDSDYDLS(1)PK                                         | 1125.4826 |
| Q9CZQ8     | S(1)DS(0.998)EEES(0.002)QDR                           | 1180.448  |
| P62137     | S(0.803)DS(0.197)EKLNLDSIIGR                          | 1545.7999 |
| Q3UWC4     | S(0.961)DS(0.039)ELEVKPSESLR                          | 1687.8628 |
| P31324     | S(0.529)DS(0.471)ENGEEEEAAEAGAFNAPVINR                | 2505.0892 |
| P49442     | S(0.001)DS(0.998)ET(0.002)QTENSDR                     | 1367.5437 |
| P62996     | S(0.002)DS(0.998)GEQNYGER                             | 1240.4956 |
| P62996     | S(0.996)DS(0.004)GEQNYGERES(1)R                       | 1612.6714 |
| A3KGC3     | S(0.039)DS(0.961)LDNEEKPPAPPLR                        | 1763.869  |
| Q5DTN3     | SDS(1)LILDHQWELEK                                     | 1711.8417 |
| A0A0R4J0S1 | S(0.001)DS(0.999)LLSFR                                | 923.47125 |
| D3Z589     | SDSLS(1)PPR                                           | 857.4243  |
| S4R2F3     | S(0.986)DS(0.014)NASFLR                               | 995.46722 |
| Q8BVL3     | S(0.132)DS(0.586)QQAVKS(0.282)PPLLES(0.98)PDAS(0.02)R | 2111.0495 |
| Q8BVL3     | S(0.152)DS(0.566)QQAVKS(0.282)PPLLES(0.98)PDAS(0.02)R | 2111.0495 |
| Q8BVL3     | S(0.132)DS(0.686)QQAVKS(0.182)PPLLES(0.98)PDAS(0.02)R | 2111.0495 |
| F7AMS7     | SDSVLPASHGHLQPAGS(1)LER                               | 2057.029  |
| S4R1L5     | SDS(1)VTGHTSQK                                        | 1145.5313 |
| E9Q743     | S(0.816)DT(0.184)EENPLEESR                            | 1404.6005 |
| Q3TAP5     | S(1)DVEENNFEGRS(1)R                                   | 1666.7183 |
| Q8BJ42     | SDVETATDS(0.981)DT(0.018)ES(0.001)R                   | 1511.6223 |
| Q8BJ42     | SDVET(0.133)AT(0.867)DS(0.974)DT(0.024)ES(0.001)R     | 1511.6223 |
| F8WIH0     | SDVIHAPLPS(1)PVDK                                     | 1473.7827 |
| Q9R0L6     | SDVS(1)DQEEDEESER                                     | 1652.6285 |
| Q5SZA3     | S(1)EAAPAAPAAAPPAEK                                   | 1447.7307 |
| E9PV14     | SEAEEGEVRT(1)PTK                                      | 1431.6842 |
| Q8BTI8     | SECDS(1)S(1)PEPK                                      | 1134.4499 |
| Q8BTI8     | SECDS(0.5)S(0.5)PEPK                                  | 1134.4499 |
| D3Z379     | SEDDAAS(1)GEHDIQIEGVR                                 | 1926.8555 |
| D2JZZ6     | SEDS(1)DEDEPCAISGK                                    | 1637.6363 |
| Q9QYB8     | SEDTVPEAAS(1)PPPSQGQHYFDR                             | 2414.0775 |
| Q9Z204     | SEEEQS(0.008)S(0.017)AS(0.974)VK                      | 1179.5255 |
| Q9Z204     | SEEEQS(0.006)S(0.012)AS(0.982)VK                      | 1179.5255 |
| F6QU81     | S(1)EEKEAGEI                                          | 990.45057 |
| A0A140LHW2 | S(1)EESLSSQASGAGLQR                                   | 1605.7594 |

|            |                                                       |           |
|------------|-------------------------------------------------------|-----------|
| A0A140LHW2 | S(0.897)EES(0.103)LSSQASGAGLQR                        | 1605.7594 |
| A0A140LHW2 | S(0.597)EES(0.403)LSSQASGAGLQR                        | 1605.7594 |
| I7HFI3     | S(1)EESLTSLHAVDGDSK                                   | 1673.7744 |
| Q3UZP2     | S(1)EESQER                                            | 863.36209 |
| A0A0R4J2D3 | SEFGS(1)LDR                                           | 909.41921 |
| D3YUV1     | S(1)EGESQTVVSSGSDPK                                   | 1592.7166 |
| Q3UMU9     | S(1)EGLSLER                                           | 889.45051 |
| Q5DTJ4     | S(1)EGSEYEEIPKR                                       | 1422.6627 |
| E0CX32     | SEGS(1)PEHTK                                          | 970.43559 |
| E0CZF8     | SEGS(1)PVLPEPSK                                       | 1362.6779 |
| F8VQN6     | SEGVQDAQEPQS(0.004)LVGS(0.753)PS(0.121)T(0.121)R      | 2070.9818 |
| F8VQN6     | SEGVQDAQEPQS(0.304)LVGS(0.453)PS(0.121)T(0.121)R      | 2070.9818 |
| Q9D0J8     | S(1)EKS(1)VEAAAELSAK                                  | 1418.7253 |
| D3Z1T4     | S(1)ELEQLR                                            | 873.4556  |
| P59648     | SELPS(0.5)S(0.5)APGGGGV                               | 1113.5302 |
| A0A140LHY3 | SELQAYIEQCQDS(0.818)PT(0.15)S(0.032)GK                | 2039.9106 |
| Q8CCV2     | SENAFDQAVDS(1)D                                       | 1296.5106 |
| Q9QYE6     | S(1)EPDDELLFDLNSQK                                    | 1982.9109 |
| G3UZU0     | SEPQPEEGS(1)PAAGQK                                    | 1510.69   |
| Q571D4     | S(0.001)EQPEEVLS(0.999)S(0.998)EEET(0.001)AGVEHV<br>R | 2340.0717 |
| Q8BTI8     | SEQPLSQVLPS(0.157)LS(0.842)PEHK                       | 1874.9738 |
| Q9QXS6     | S(0.366)ES(0.634)EVEEAAAIQAQRPNPR                     | 2181.0662 |
| A0A0G2JG07 | S(0.002)ES(0.998)GYGFNVR                              | 1114.5043 |
| Q80Y83     | S(0.461)ES(0.539)IITQAEEK                             | 1233.6089 |
| E0CY19     | SES(1)LDEEEKLELQR                                     | 1703.8214 |
| E9PZP8     | SES(1)LTAESR                                          | 978.4618  |
| H3BKV4     | S(0.007)ES(0.993)PCLRDS(1)PDRR                        | 1573.7267 |
| H3BKV4     | S(0.307)ES(0.693)PCLRDS(1)PDRR                        | 1573.7267 |
| B2RQQ5     | SES(1)PFEGK                                           | 879.39741 |
| Q3U7F3     | S(1)ES(1)PKEPEQLR                                     | 1298.6466 |
| A0A087WNZ7 | S(0.002)ES(0.998)PPAELPSLR                            | 1281.6565 |
| Q53TY6     | SES(1)PPPLSEPK                                        | 1166.5819 |
| S4R1M2     | SES(1)PSTR                                            | 762.3508  |
| Q9D3X9     | S(0.163)ES(0.825)PT(0.012)ADSDASSLHEQPQQAIAIK         | 2438.1561 |
| P59648     | SES(1)PTCK                                            | 807.34327 |
| S4R294     | S(0.922)ES(0.078)S(0.001)DFEVVPK                      | 1222.5717 |
| B2RRE3     | SESVGFSL(0.958)PS(0.042)R                             | 1293.6201 |
| P43274     | S(0.877)ET(0.123)APAAPAAPAPAEK                        | 1477.7413 |
| P43274     | S(1)ETAPAAPAAPAPAEK                                   | 1477.7413 |
| P43274     | S(0.646)ET(0.354)APAAPAAPAPAEK                        | 1477.7413 |
| Q3U292     | S(0.932)ET(0.068)APAAPAAPAPVEK                        | 1505.7726 |
| Q1WWK3     | S(1)ETAPAETAAPAPVEK                                   | 1567.773  |

|            |                                                                    |           |
|------------|--------------------------------------------------------------------|-----------|
| Q1WWK3     | SETAPAETAAPAPVEKS(1)PAKK                                           | 2079.0848 |
| P43275     | S(0.856)ET(0.144)APVAQAASSTATEKPAAAK                               | 1999.0222 |
| Q91WF5     | SET(0.001)LVNAQQT(0.999)PLGT(1)PK                                  | 1682.8839 |
| E9QNQ4     | SET(0.254)S(0.746)PVAPR                                            | 942.47706 |
| A0A571BED8 | SETSSNPS(0.003)S(0.997)PEICPNK                                     | 1732.7574 |
| P48722     | S(1)FDDPIVQTER                                                     | 1305.6201 |
| A2ATQ5     | SFDFEGS(0.155)LS(0.845)PVIAPK                                      | 1592.8086 |
| Q8BQG3     | S(1)FDHLISDTK                                                      | 1161.5666 |
| Q3UXS8     | S(1)FDYNYR                                                         | 963.40865 |
| A0A1W2P6Z1 | S(1)FES(1)DAEDHKPLK                                                | 1501.7049 |
| Q8C078     | S(1)FGNPFEGSR                                                      | 1096.4938 |
| B1AUD3     | S(1)FGNPFEPQAR                                                     | 1248.5887 |
| Q8CAC4     | SFGS(1)PNR                                                         | 763.3613  |
| E9PZY8     | SFLSEPS(0.776)S(0.224)PGR                                          | 1162.5619 |
| B9EKJ3     | SFQEILQIVS(1)PVR                                                   | 1514.8457 |
| A2AHW8     | SFS(1)DVLPESPK                                                     | 1204.5976 |
| A0A1Y7VM80 | S(0.915)FS(0.085)EDA VTDSSGSGTLPR                                  | 1811.8174 |
| A0A1Y7VM80 | S(0.615)FS(0.385)EDA VTDSSGSGTLPR                                  | 1811.8174 |
| A0A1Y7VM80 | S(0.415)FS(0.585)EDA VTDSSGSGTLPR                                  | 1811.8174 |
| H9KV01     | S(0.999)FS(0.004)IS(0.979)PS(0.018)R                               | 879.44503 |
| H9KV01     | S(0.999)FS(0.002)IS(0.999)PVR                                      | 891.48142 |
| Q8R2V4     | S(0.002)FS(0.998)KEVEER                                            | 1109.5353 |
| G5E8A0     | SFS(0.001)LAS(0.001)S(0.006)GNS(0.979)PIS(0.014)QR                 | 1536.7532 |
| A0A3B2WBH9 | SFS(1)PEER                                                         | 850.3821  |
| Q8C993     | SFS(1)PGDFR                                                        | 911.41373 |
| A1A4C2     | S(0.577)FS(0.423)PLQPGAAPQGR                                       | 1411.7208 |
| A1A4C2     | S(0.8)FS(0.2)PLQPGAAPQGR                                           | 1411.7208 |
| Q3TXH9     | S(0.001)FS(0.999)QPGLR                                             | 890.46102 |
| Q8BTI8     | SGAGS(1)PPGKR                                                      | 912.47773 |
| P48678     | SGAQAS(0.003)S(0.008)T(0.059)PLS(0.687)PT(0.244)R                  | 1358.679  |
| Q8BIZ6     | S(1)GDALTTVVVK                                                     | 1088.6077 |
| A0A494BAG5 | S(1)GDEEFRGEDDLCDLR                                                | 1885.7384 |
| A0A087WRY3 | S(1)GDEGESEDEAS(0.196)S(0.804)GED                                  | 1469.4914 |
| Q00PI9     | S(1)GDET(1)PGS(1)EAPGDK                                            | 1345.5634 |
| A0A0R4J119 | S(0.001)GDGES(0.193)T(0.806)PVEHVR                                 | 1368.627  |
| Q6DD95     | S(1)GDNSSSSSLGDVVTGTR                                              | 1637.7493 |
| Q05BN2     | S(1)GEDEQQEQTIAEDLVVTK                                             | 2117.9964 |
| Q3UDN8     | S(1)GEGEVSGLLR                                                     | 1102.5619 |
| E9QN14     | S(1)GGDT(0.004)HS(0.996)PPR                                        | 1009.4577 |
| A2AW14     | S(1)GGGEQPDILSVGILVK                                               | 1667.9094 |
| D3Z7E5     | S(1)GGGPSGGPGGSGR                                                  | 1142.5065 |
| A4PI84     | S(0.001)GGGS(0.017)GGGAARPVVS(0.885)PS(0.099)PS(0.109)VLS(0.89)EGR | 2125.0512 |



|            |                                                                         |           |
|------------|-------------------------------------------------------------------------|-----------|
| A0A087WRY3 | S(0.009)GKNS(0.991)QEDS(1)EDS(1)EEKDVK                                  | 2009.8662 |
| A0A5F8MPF0 | SGLS(1)LEELR                                                            | 1002.5346 |
| Q3UJC3     | SGLS(1)PANDTGAK                                                         | 1116.5411 |
| A0A0R4J0J0 | S(0.048)GPQCS(0.317)S(0.317)PT(0.317)CQEETEDVR                          | 2065.8317 |
| A0A0J9YUE9 | SGQAS(0.967)PS(0.032)RPES(0.001)PRPPFDL                                 | 1923.9439 |
| Q4W8U9     | S(1)GQLGLPDEENR                                                         | 1313.6212 |
| Q5DTM8     | S(0.013)GS(0.013)ALLQS(0.377)QS(0.376)S(0.606)T(0.605)EDPKDEPT(0.01)ELK | 2446.1711 |
| G5E8J2     | S(0.036)GS(0.964)DPAADAATSFLR                                           | 1464.6845 |
| Q62018     | S(0.5)GS(0.5)EQSDNESVQSGR                                               | 1565.6554 |
| Q0VF54     | SGS(1)FQGAVR                                                            | 907.45118 |
| REV_Q8R1X0 | S(0.993)GS(0.007)IISGR                                                  | 775.41882 |
| A0A0A6YXT6 | SGSIS(0.004)S(0.135)S(0.791)PS(0.069)R                                  | 963.46214 |
| G3X9H5     | S(0.125)GS(0.875)IVELLAGGS(0.001)S(0.003)CS(0.994)PVL(0.001)R           | 2032.0259 |
| P0C192     | S(0.623)GS(0.377)KENVQETQI                                              | 1318.6365 |
| Q9CY64     | S(0.621)GS(0.379)LEEVPNVGVNK                                            | 1427.7256 |
| A0A1B0GR11 | S(0.846)GS(0.154)PVKR                                                   | 729.41334 |
| A0A1B0GR11 | S(0.999)GS(0.001)PVKR                                                   | 729.41334 |
| A0A1B0GR11 | S(1)GSPVKR                                                              | 729.41334 |
| Q8BNW9     | S(0.064)GS(0.936)RPQS(0.675)PS(0.325)GDAESR                             | 1516.6866 |
| Q8BTI8     | SGS(0.999)S(0.001)PGLR                                                  | 759.38752 |
| P70698     | S(0.038)GS(0.205)S(0.878)S(0.878)PDS(0.001)EITELK                       | 1435.6678 |
| Q3USH9     | S(0.001)GS(0.998)T(0.001)DSL NPR                                        | 1032.4836 |
| Q3UGY8     | S(0.046)GS(0.918)T(0.033)GS(0.003)SLSVSVR                               | 1222.6153 |
| D3Z0V2     | SGTLKS(1)PPK                                                            | 913.52328 |
| D3Z0V2     | S(1)GTLKSPPK                                                            | 913.52328 |
| D3Z483     | S(0.995)GT(0.005)NNVAQAR                                                | 1016.4999 |
| D3Z483     | S(0.769)GT(0.231)NNVAQAR                                                | 1016.4999 |
| Q5DTN3     | SGT(0.266)S(0.734)QEELR                                                 | 1005.4727 |
| Q61823     | SGVAVPT(0.016)S(0.984)PK                                                | 941.5182  |
| Q6PHU5     | S(0.001)GYHDDS(0.999)DEDLLE                                             | 1493.5794 |
| A0A0A0MQC7 | SGYS(0.003)S(0.996)PGS(0.001)PGTPGSR                                    | 1392.627  |
| A0A0A0MQC7 | S(0.286)GY(0.632)S(0.076)S(0.045)PGS(0.955)PGT(0.006)PGSR               | 1392.627  |
| D3Z1Z8     | S(1)HEAEVLK                                                             | 911.47125 |
| B7ZMR0     | SHGAEGGGGS(1)PEK                                                        | 1168.5109 |
| B7ZMR0     | S(1)HGAEGGGGSPEK                                                        | 1168.5109 |
| B1APX2     | SHS(1)ANDSEEFFR                                                         | 1424.5957 |
| Q3UGS6     | SHSEGLDFKPS(0.977)PPLS(0.023)K                                          | 1853.9159 |
| Q8BTI8     | S(0.013)HS(0.987)GSSPEVDSK                                              | 1215.5368 |
| Q3UHB8     | SHS(1)LDSLRS                                                            | 1000.4938 |
| Q3UHD8     | S(0.001)HS(0.999)LEGPSK                                                 | 940.46141 |
| Q3TWW8     | S(1)HS(1)PLPAPPSK                                                       | 1116.5928 |

|            |                                                              |           |
|------------|--------------------------------------------------------------|-----------|
| Q8BTI8     | S(0.004)HS(0.36)PS(0.658)S(0.978)PER                         | 982.44682 |
| E9PUC5     | S(0.088)HS(0.867)S(0.044)PS(0.001)LNPDAS(0.979)PVT(0.021)AK  | 1693.8271 |
| Q3UGC5     | S(0.902)HT(0.098)GEAAAVR                                     | 997.49411 |
| Q3UGC5     | S(0.131)HT(0.869)GEAAAVR                                     | 997.49411 |
| A2ARP8     | SHWDDGTNDS(1)DLEK                                            | 1617.6543 |
| P21447     | S(1)ICGPHDQDR                                                | 1183.504  |
| A0A0N4SVB5 | S(1)IDAALFR                                                  | 891.48142 |
| E9QKK4     | S(1)IDTQTPSVQER                                              | 1359.663  |
| E9PXE6     | S(1)IEDLHR                                                   | 868.44028 |
| P08553     | S(1)IELESVR                                                  | 931.49746 |
| B1AZ85     | S(1)IEVENDFLPVEK                                             | 1517.7613 |
| Q8K0A3     | SIFTPVS(0.822)S(0.178)K                                      | 964.52295 |
| Q99NU3     | S(1)IIIHTSEDGK                                               | 1198.6194 |
| Q99NU3     | SIIIHTS(1)EDGK                                               | 1198.6194 |
| D3YYE6     | SINDDGS(0.195)S(0.805)DPR                                    | 1161.4898 |
| D3YYE6     | SINDDGS(0.001)S(0.999)DPR                                    | 1161.4898 |
| P97427     | S(1)IPHITSDR                                                 | 1024.5302 |
| A2AP93     | S(0.73)IQDLT(0.264)VT(0.006)GTEPGQVSSR                       | 1873.9381 |
| Q99PT1     | S(1)IQEIQELDKDDESLR                                          | 1916.9327 |
| P05213     | S(1)IQFVDWCPTGFK                                             | 1583.7442 |
| Q5BLJ8     | S(0.998)IQKNMVY(0.505)T(0.498)CHRDK                          | 1778.8556 |
| Q9JL04     | SIQT(0.026)S(0.968)PT(0.006)EEGR                             | 1203.5731 |
| Q9JL04     | SIQT(0.687)S(0.305)PT(0.007)EEGR                             | 1203.5731 |
| O35691     | SIS(0.998)ES(0.002)SR                                        | 764.36645 |
| E9Q2E4     | S(0.002)IS(0.975)GT(0.023)PAETPACK                           | 1317.6235 |
| A0A0U1RQB6 | S(0.01)IS(0.99)PSALQDLLR                                     | 1298.7194 |
| Q8R1P3     | S(1)KEEQELHDIHSTR                                            | 1707.8176 |
| A0A087WRY3 | SKEKT(1)PS(1)PK                                              | 1000.5553 |
| Q3US81     | S(1)KEQLNSYT                                                 | 1068.5088 |
| Q8BPS5     | S(1)KES(1)LQEAGK                                             | 1075.551  |
| A2AJT3     | S(0.006)KFDS(0.994)DEEDEDAENLEAVS(0.002)S(0.034)GKVT(0.963)R | 2756.2261 |
| Q00PI9     | SKPAGS(1)DGERR                                               | 1158.5741 |
| Q542V3     | SKPNVPAES(1)R                                                | 1083.5673 |
| Q8C714     | S(0.024)KS(0.976)DNQISDK                                     | 1120.536  |
| Q8C714     | S(0.001)KS(0.999)DNQISDK                                     | 1120.536  |
| S4R2F3     | SKS(1)ESDASSLDAK                                             | 1323.6154 |
| O35326     | S(1)KS(1)PASVDR                                              | 945.48796 |
| Q62093     | S(1)KS(1)PPKS(0.996)PEEEGAVS(0.002)S(0.002)                  | 1614.7737 |
| O88737     | S(0.002)KT(0.008)PPS(0.78)NLS(0.21)PIEDAS(0.95)PT(0.05)EELR  | 2267.1281 |
| Q6PCN6     | SLAVS(1)DEEEAEAAAEEK                                         | 1763.7585 |
| D3YUW8     | SLDAEPSVPSAAKPS(0.163)S(0.837)PEK                            | 1895.9476 |

|            |                                                                 |           |
|------------|-----------------------------------------------------------------|-----------|
| D3YUW8     | SLDAEPSVPSAAKPS(0.015)S(0.985)PEK                               | 1895.9476 |
| O35245     | S(0.032)LDDS(0.965)EEEDDEDS(0.002)GHSSR                         | 2007.7413 |
| Q8K070     | S(1)LDEDEPPSPLAR                                                | 1521.7311 |
| F6TZK4     | S(1)LDEIHPTR                                                    | 1066.5407 |
| Q80WQ4     | S(1)LDESTLR                                                     | 919.46108 |
| A0A571BEG4 | S(1)LDGAAAESTDR                                                 | 1262.5739 |
| A2AUK8     | S(1)LDGAEFSR                                                    | 980.45632 |
| A2AUK8     | S(0.608)LDGAEFS(0.374)RPAS(0.547)VS(0.471)ENHDA<br>GPDGDKR      | 2713.2328 |
| E9PV14     | S(1)LDGEFSR                                                     | 909.41921 |
| D0VYV6     | S(1)LDGEVGTGQYATTK                                              | 1525.726  |
| S4R1L5     | S(1)LDGLSR                                                      | 746.39227 |
| A0A2R8VHB6 | S(1)LDGVSENHDAGPDGDKR                                           | 1867.8296 |
| G3FEZ6     | S(1)LDIAEAHPQFSK                                                | 1441.7201 |
| A0A1B0GRY7 | S(1)LDIQCEQLSDAR                                                | 1533.7093 |
| V9GXD9     | S(1)LDLPSIGGSSVGK                                               | 1315.6983 |
| B2RTB0     | SLDS(1)DESEDEDDDYQQK                                            | 2016.7556 |
| Q3UHD8     | S(1)LDSLDPAGLLTSPK                                              | 1512.8035 |
| B1AS06     | S(1)LDSVDR                                                      | 790.3821  |
| E9QN14     | S(1)LEAEALAEDIEK                                                | 1416.6984 |
| Q8K394     | S(1)LEAIPEK                                                     | 885.48075 |
| Q8CFP9     | S(1)LECQDALETAAR                                                | 1462.6722 |
| S4R294     | S(1)LEDVKPR                                                     | 942.51345 |
| V9GXI9     | S(1)LELNGAGEPVEGAPR                                             | 1594.7951 |
| E9Q0A3     | S(1)LENPT(1)PPFTPK                                              | 1326.682  |
| Q6PGJ3     | S(1)LES(1)DNEEK                                                 | 1049.4513 |
| E9PZ19     | S(0.009)LES(0.985)PLS(0.008)S(0.034)GKVS(0.921)PES(0<br>.043)IR | 1771.9316 |
| A8IP73     | S(1)LGDASPSAPESVGAR                                             | 1499.7216 |
| A0A1D5RM83 | SLGGQGS(1)PK                                                    | 957.48796 |
| D3YXG2     | SLGLS(0.001)LS(0.999)GGEQEDAVR                                  | 1616.8006 |
| D3YXG2     | SLGLS(0.006)LS(0.994)GGEQEDAVR                                  | 1616.8006 |
| Q8C9Y1     | S(0.027)LGS(0.972)EEINPVHT(0.001)DNFQER                         | 2070.9607 |
| P97492     | S(1)LGSGESESESRPGK                                              | 1505.6958 |
| E9QNQ4     | S(0.7)LGS(0.299)LS(0.001)QGSANATVLDVAQTGGHK                     | 2297.1612 |
| M0QWD1     | S(1)LKDDDSGDHDQNEENSTQK                                         | 2260.9316 |
| B2RQQ5     | S(0.001)LMS(0.999)S(1)PEDLTK                                    | 1206.5802 |
| Q9CRX5     | S(1)LNANTDITSLAR                                                | 1374.7103 |
| F2Z3U3     | SLPAS(0.001)GT(0.04)PQS(0.959)PPAVK                             | 1435.7671 |
| A0A286YDH6 | S(1)LPEIDGLSK                                                   | 1057.5655 |
| E9PV14     | S(1)LPELDR                                                      | 828.43413 |
| P97492     | S(1)LPLGVEELGQLPLAEGPCGR                                        | 2191.1307 |
| A2AJW4     | SLPT(0.019)S(0.981)PERR                                         | 1041.5567 |
| E9Q453     | S(1)LQEQADAAEER                                                 | 1345.611  |

|            |                                                                                                                                   |           |
|------------|-----------------------------------------------------------------------------------------------------------------------------------|-----------|
| B9EKJ1     | S(1)LQQLAEER                                                                                                                      | 1072.5513 |
| E9Q226     | SLS(1)ADNFIGIQR                                                                                                                   | 1319.6834 |
| Q8VDN4     | S(0.001)LS(0.999)APLHPEFEEVYR                                                                                                     | 1772.8733 |
| Q8VDN4     | S(0.123)LS(0.877)APLHPEFEEVYR                                                                                                     | 1772.8733 |
| Q8VDN4     | S(0.354)LS(0.646)APLHPEFEEVYR                                                                                                     | 1772.8733 |
| Q8VDN4     | S(0.007)LS(0.993)APLHPEFEEVYR                                                                                                     | 1772.8733 |
| B9VU63     | S(1)LSDLTSQK                                                                                                                      | 977.50294 |
| O88737     | S(0.08)LS(0.919)DPKPLS(0.001)PTAEESAK                                                                                             | 1755.8891 |
| Q9DCC5     | S(0.001)LS(0.999)DSESDDSK                                                                                                         | 1168.4732 |
| Q3B7Z2     | SLS(1)ELESJK                                                                                                                      | 1004.539  |
| Q8BTI8     | S(1)LS(1)GSSPCPK                                                                                                                  | 1018.4753 |
| B7ZN48     | SLSGST(0.001)NT(0.095)VS(0.909)S(0.989)EGVT(0.006)<br>K                                                                           | 1552.758  |
| E9Q9X1     | SLS(1)GTLTELDDK                                                                                                                   | 1277.6351 |
| Q8K031     | S(0.024)LS(0.976)IESLCPDEGR                                                                                                       | 1461.677  |
| F6S5Z6     | SLS(1)LESTDR                                                                                                                      | 1006.4931 |
| V9GXD9     | SLS(1)LGDK                                                                                                                        | 718.38612 |
| A0A0U1RNK7 | S(0.101)LS(0.358)NS(0.443)NPDIS(0.048)GT(0.215)PT(0.2<br>41)S(0.594)PDDEVK                                                        | 2186.9927 |
| O35691     | S(0.138)LS(0.862)PGKENINSQEVEKESEEK                                                                                               | 2360.1343 |
| Q80TU6     | S(1)LS(1)PGVSR                                                                                                                    | 801.43447 |
| E9PV14     | SLS(1)PIIGK                                                                                                                       | 813.496   |
| Q69ZA1     | S(1)LS(1)PLGGR                                                                                                                    | 785.43955 |
| Q80TU6     | SLS(1)PLSGTTDTK                                                                                                                   | 1205.6139 |
| B1AZ46     | SLS(1)PPQSQSK                                                                                                                     | 1057.5404 |
| E9Q784     | S(0.07)LS(0.929)PSHLTEDR                                                                                                          | 1240.6048 |
| P58871     | S(0.004)LS(0.157)S(0.144)GFS(0.695)PEEAQQQDEEFEK<br>K                                                                             | 2399.0765 |
| Q68FF6     | SLS(0.004)S(0.996)PTDNLELSAR                                                                                                      | 1488.742  |
| Q68FF6     | S(0.005)LS(0.332)S(0.332)PT(0.332)DNLELSAR                                                                                        | 1488.742  |
| G5E8T0     | S(0.002)LS(0.869)T(0.126)S(0.003)GESLYHVLGLDK                                                                                     | 1804.9207 |
| Q8BTI8     | S(0.006)LS(0.992)Y(0.004)S(0.998)PVER                                                                                             | 1036.5189 |
| A0A0G2JGY9 | S(0.991)LT(0.009)DLNQDPSR                                                                                                         | 1244.5997 |
| A0A0N4SVB5 | S(0.006)LT(0.994)EVCLR                                                                                                            | 976.50117 |
| Q8K0I9     | S(0.004)NS(0.996)LPHPAGGGK                                                                                                        | 1120.5625 |
| Q8R0J5     | S(0.27)NS(0.73)LPHSAVSNAASK                                                                                                       | 1468.727  |
| A0A087WNU5 | SNS(1)PENR                                                                                                                        | 802.35694 |
| A0A0G2JGY9 | SNS(1)PENTR                                                                                                                       | 903.40462 |
| Q3UH26     | S(0.051)NS(0.949)QENVEASHPSQDGK                                                                                                   | 1812.7874 |
| P97825     | SNS(1)SEASSGDFLDLK                                                                                                                | 1555.7002 |
| F6XRZ6     | S(0.055)PS(0.899)S(0.045)S(0.001)TGSIASSR                                                                                         | 2338.1248 |
| F7AYY9     | S(0.032)NS(0.936)T(0.032)EYLNPFWK                                                                                                 | 1484.6936 |
| A0A1BOGT92 | S(0.002)NS(0.002)VDT(0.002)GPS(0.002)S(0.002)S(0.002)<br>LS(0.002)T(0.002)PT(0.002)EPLS(0.714)PT(0.212)S(0.053)<br>S(0.004)LGEERN | 3032.4058 |

|            |                                                            |           |
|------------|------------------------------------------------------------|-----------|
| Q6PB99     | S(0.011)NS(0.989)VEKPVSSLLSR                               | 1501.81   |
| P19246     | S(1)PAAVKS(1)PGEAK                                         | 1140.6139 |
| P0C7M9     | S(1)PAEAEAR                                                | 829.393   |
| P19246     | S(1)PAEAKS(1)PAAVK                                         | 1154.6295 |
| P19246     | S(1)PAEAKS(1)PAEAKS(1)PAEAK                                | 1767.9003 |
| P19246     | S(1)PAEAKS(0.998)PAT(0.002)VK                              | 1767.9367 |
| P19246     | S(1)PAEAKS(1)PAEVKS(1)PGEAK                                | 1781.9159 |
| P19246     | S(1)PAEAKS(0.999)PAT(0.001)VK                              | 1184.6401 |
| P19246     | S(1)PAEAKS(1)PEKAK                                         | 1241.6616 |
| Q3UEX8     | S(1)PAEEELTPSAVVR                                          | 1483.7518 |
| P19246     | S(1)PAEPKS(1)PAEAKS(1)PAEPK                                | 1819.9316 |
| P19246     | S(1)PAEVKS(1)PAEAKS(1)PAEVK                                | 1823.9629 |
| P35831     | S(1)PAEVTDIGFGNR                                           | 1361.6575 |
| Q8K327     | SPAGS(1)PELK                                               | 884.46035 |
| S4R1L5     | S(0.999)PAT(0.02)S(0.98)PISSNSHR                           | 1339.648  |
| P19246     | S(1)PATVKS(1)PGEAK                                         | 1170.6245 |
| Q9QYB8     | SPAVS(1)PSK                                                | 771.41267 |
| Q9QYB8     | S(1)PAVS(1)PSKTSEDTK                                       | 1432.7046 |
| Q9QYB8     | S(0.032)PAVS(0.968)PS(0.005)KT(0.602)S(0.393)EDTK          | 1432.7046 |
| Q9QYB8     | S(0.032)PAVS(0.968)PS(0.005)KT(0.702)S(0.293)EDTK          | 1432.7046 |
| B2RQQ5     | S(1)PCDSGYSYETIEK                                          | 1634.677  |
| E9QAF9     | SPCETIS(0.508)S(0.344)PS(0.043)S(0.043)T(0.062)LES(0.001)K | 1708.7825 |
| A0A0G2JGX4 | S(1)PDCTHDNPLETR                                           | 1540.6576 |
| Q5FW97     | S(1)PDDPSR                                                 | 772.33515 |
| F6W8Y8     | S(0.982)PDEVT(0.01)LT(0.007)S(0.001)IVPTR                  | 1513.7988 |
| Q8VDN2     | S(1)PDFTNENPLETR                                           | 1518.6951 |
| Q3TAB8     | S(1)PDLGHSTQIPR                                            | 1306.663  |
| Q3TN48     | S(1)PDSDSVSPGPQRPPSSQR                                     | 2076.9825 |
| A0A571BDA2 | S(1)PDSGLDCGSEEEESR                                        | 1752.6745 |
| A0A087WSQ1 | S(0.999)PDS(0.001)TANVR                                    | 945.45157 |
| Q9D074     | S(0.999)PDS(0.001)TLR                                      | 774.38718 |
| P19246     | S(1)PEAQT(1)PVQEEAK                                        | 1412.6783 |
| Q1WWN0     | S(1)PECSTVDGGSQVR                                          | 1477.6467 |
| Q8CB77     | S(0.999)PEEDQEPIIS(0.001)HQBPGK                            | 1917.9432 |
| Q6PGG9     | S(1)PEEFNPK                                                | 946.43961 |
| A0A1L1SSS4 | S(1)PEESTER                                                | 933.40395 |
| Q9QYI5     | S(1)PEEVFR                                                 | 862.41848 |
| P19246     | S(1)PEKAKS(1)PVK                                           | 1069.6132 |
| P19246     | S(1)PEKEEAK                                                | 916.45018 |
| Q3U237     | S(1)PEKEGVLGVEK                                            | 1270.6769 |
| D3Z589     | S(1)PEPEATLTFPFLDK                                         | 1690.8454 |
| E9Q3M9     | S(1)PEQPGTKPPLPR                                           | 1402.7569 |

|            |                                                                      |           |
|------------|----------------------------------------------------------------------|-----------|
| Q8R0W2     | S(1)PEQSPPAR                                                         | 967.47231 |
| A0A140T8R7 | S(0.631)PES(0.184)S(0.184)IKIPEEEDEAASVLDVR                          | 2399.1704 |
| A0A140T8R7 | S(0.731)PES(0.084)S(0.184)IKIPEEEDEAASVLDVR                          | 2399.1704 |
| A0A140T8R7 | S(0.6)PES(0.2)S(0.2)IKIPEEEDEAASVLDVR                                | 2399.1704 |
| Q80XK6     | S(1)PGADVTCSLPR                                                      | 1258.5976 |
| Q3TPH3     | S(1)PGASNFSTLPK                                                      | 1204.6088 |
| Q9JMG7     | S(1)PGDEDDKDCKEENK                                                   | 1893.7534 |
| P19246     | S(1)PGEAKS(1)PAAVKS(1)PAEAK                                          | 1723.9105 |
| P19246     | S(1)PGEAKS(1)PAEAKS(1)PAEAK                                          | 1753.8846 |
| P19246     | S(1)PGEAKS(1)PAEPKS(1)PAEAK                                          | 1779.9003 |
| P19246     | S(1)PGEAKS(1)PAEPKS(1)PAEPK                                          | 1805.9159 |
| P19246     | S(1)PGEAKS(1)PGEAKS(1)PAEAK                                          | 1739.869  |
| P19246     | S(1)PGEAKS(0.985)PS(0.015)EAK                                        | 1186.583  |
| A0A0J9YUF2 | S(1)PGESQSEDIEASR                                                    | 1490.6485 |
| Q8CD55     | S(1)PGGPGPLTLK                                                       | 1022.576  |
| A0A3B2WCD2 | S(1)PGHEGEGGGEWPGISGER                                               | 1893.8242 |
| Q99PP2     | S(1)PGLCSDSSLEESLR                                                   | 1635.741  |
| B2RSY3     | S(1)PGLPIR                                                           | 738.43882 |
| Q9ESN6     | S(1)PGSGHVK                                                          | 767.3926  |
| Q9QZA3     | SPGS(1)PQLSR                                                         | 927.47739 |
| A0A5F8MPF3 | S(0.977)PGT(0.023)EEAKS(0.998)PLAT(0.002)K                           | 1414.7304 |
| A0A5F8MPF3 | S(0.877)PGT(0.123)EEAKS(0.998)PLAT(0.002)K                           | 1414.7304 |
| Q8K232     | S(1)PGT(1)PAGEGSGSPPK                                                | 1324.6259 |
| B1AQX6     | S(1)PGVLFQFGETR                                                      | 1578.8042 |
| E9Q3F7     | S(1)PGVPDAEDDDER                                                     | 1400.5692 |
| P19246     | S(1)PIEVKS(1)PEK                                                     | 1112.6077 |
| Q9R1L5     | S(1)PITIQR                                                           | 813.47085 |
| Q8C5G1     | S(1)PIVNER                                                           | 813.43447 |
| Q80TT3     | SPLPPILGS(0.859)PT(0.141)K                                           | 1205.702  |
| Q542T4     | S(1)PLPSHAR                                                          | 863.46135 |
| Q569Z6     | S(1)PLQSVVVR                                                         | 983.57638 |
| S4R2F3     | S(0.449)PLS(0.554)PDT(0.689)PS(0.157)S(0.149)EEVS(0.01)Y(0.001)EVTPK | 2148.011  |
| B1AXV1     | SPLS(1)PGAK                                                          | 755.41775 |
| Q3KQQ1     | S(1)PNELVDDLK                                                        | 1275.6347 |
| Q330P7     | SPNPSDGGGDT(0.001)PLAQS(0.997)DEEDGDDGGAEP<br>GPCS(0.001)            | 3086.1803 |
| B1AQX6     | S(1)PNTAILIK                                                         | 955.57023 |
| Q569Z6     | S(1)PPATGSAYGSSQK                                                    | 1336.6259 |
| F8WGR0     | SPPDQS(0.003)AVPNT(0.964)PPS(0.516)T(0.517)PVKLE<br>EAGDCAK          | 2848.3549 |
| Q8K232     | SPPDQSAVPNT(0.168)PPS(0.867)T(0.964)PVKLEEDLPQ<br>EPTSR              | 3212.5837 |
| Q8VC91     | S(1)PPEEPPDFCCPK                                                     | 1558.6432 |
| Q8CI71     | S(0.995)PPES(0.005)LNDLGAFESLR                                       | 1730.8475 |

|            |                                                       |           |
|------------|-------------------------------------------------------|-----------|
| Q8CI71     | S(0.895)PPES(0.105)LNDLGAFESLR                        | 1730.8475 |
| Q8C996     | S(1)PPGPGVPRPPPR                                      | 1309.7255 |
| Q3UH83     | S(1)PPGPPGSR                                          | 850.42972 |
| B2RQQ5     | S(1)PPLLGSESPYEDFLSADSK                               | 2138.0055 |
| Q6PCN6     | S(1)PPLPAVIK                                          | 920.5695  |
| Q3UFL8     | S(1)PPPPPPPPR                                         | 1037.5658 |
| Q8BUT2     | S(1)PPPSPTTQR                                         | 1066.5407 |
| Q9D2P8     | S(1)PPRPAKPR                                          | 1004.5879 |
| S0DHL8     | S(1)PPSPATDQR                                         | 1054.5043 |
| Q3TBZ3     | S(1)PPVSVNR                                           | 854.46102 |
| Q3TDD8     | S(0.816)PPY(0.009)T(0.174)AFLGNLPY(0.001)DVTEDSI<br>K | 2326.1369 |
| Q3TDD8     | S(0.716)PPY(0.009)T(0.274)AFLGNLPY(0.001)DVTEDSI<br>K | 2326.1369 |
| S4R2F3     | S(1)PQGLELPLPNR                                       | 1319.7197 |
| P28028     | S(1)PQKPIVR                                           | 923.55525 |
| H3BIW0     | S(1)PQPPSR                                            | 767.3926  |
| B7ZBV7     | S(0.029)PS(0.971)ADQSLDDSPSK                          | 1432.6318 |
| Q3UNH4     | S(0.89)PS(0.11)AEAAAPPPGPR                            | 1303.6521 |
| A0A1W2P8E9 | S(0.001)PS(0.999)DNSLNTTGIICR                         | 1633.773  |
| O70161     | SPS(1)DTSEQPR                                         | 1102.4891 |
| F1DGF6     | SPSDYSNFDPEFLNEKPQLS(0.433)FS(0.567)DK                | 2790.2661 |
| P19246     | S(0.404)PS(0.596)EAKS(1)PAEAKS(1)PAEAK                | 1783.8952 |
| A0A3B2WCL5 | S(0.953)PS(0.047)ESAEETHTLEEK                         | 1672.7428 |
| Q14AX3     | S(0.047)PS(0.953)GGAAGPLLTPSQSLDGSR                   | 1953.9756 |
| Q9Z2C9     | S(0.998)PS(0.002)GGEHAPSEDSGK                         | 1440.6117 |
| A0A3Q4L393 | S(0.007)PS(0.993)GS(1)PHR                             | 823.39366 |
| B7ZNF6     | S(1)PS(0.999)IDS(0.001)IQK                            | 973.50803 |
| Q6PHC0     | S(0.999)PS(0.001)KVEVTEK                              | 1102.587  |
| B2RQQ5     | S(0.024)PS(0.976)LSPSPS(1)PIEK                        | 1421.7402 |
| A2A8V9     | S(0.914)PS(0.086)LSSK                                 | 704.37047 |
| A2A8V9     | S(1)PS(1)PAPPPPPPPPPR                                 | 1583.846  |
| D3YVH4     | S(1)PS(1)PEPIYNSEGK                                   | 1403.6569 |
| A0A1W2P7T9 | S(1)PS(1)PLQAPEK                                      | 1052.5502 |
| A0A3Q4EBK4 | S(1)PS(1)PPPDGSPAATPEIR                               | 1674.8213 |
| A0A0S3CWK3 | SPS(1)PPPR                                            | 736.38679 |
| A7TU71     | S(1)PS(1)PQFAPQK                                      | 1085.5506 |
| Q3UID0     | S(0.998)PS(0.986)PS(0.016)PTPEAK                      | 1096.5401 |
| F6RUK9     | S(0.995)PS(0.994)PT(0.011)LGESLAPR                    | 1310.683  |
| Q8VHK1     | S(0.001)PS(0.999)QESIGAR                              | 1030.5043 |
| Q9Z2C9     | S(0.386)PS(0.455)QGEDEDS(0.159)ALILTQDNLK             | 2029.9804 |
| A4FU75     | S(0.896)PS(0.104)QQEILLR                              | 1169.6404 |
| Q6PB94     | S(0.99)PS(0.008)S(0.002)DSWTCADASTGR                  | 1683.6795 |
| Q8BG40     | S(0.999)PS(0.003)S(0.997)EDDRDER                      | 1291.5277 |

|            |                                                                       |           |
|------------|-----------------------------------------------------------------------|-----------|
| Q6ZQ92     | SPS(1)SEEIER                                                          | 1032.4724 |
| Q7TT84     | SPSSLSANVT(0.01)S(0.094)S(0.896)PK                                    | 1360.6834 |
| B9EHT4     | S(0.773)PS(0.227)SPSLGSLQQR                                           | 1342.6841 |
| F7AYY9     | S(0.993)PS(0.007)S(0.001)S(0.894)T(0.1)GS(0.005)IASSR                 | 1222.579  |
| Q8CI71     | S(0.887)PS(0.113)VSPSK                                                | 787.40758 |
| Q8BTI8     | S(0.849)PS(0.151)VSSPEPTEK                                            | 1243.5932 |
| D3YZ06     | S(0.003)PS(0.997)WEPFR                                                | 1004.4716 |
| B1AXF3     | S(0.308)PT(0.692)AGDKDGPTLPSKPR                                       | 1722.8901 |
| Q6KAP6     | S(0.927)PT(0.073)DFLELEQPR                                            | 1430.7042 |
| A2AGR1     | S(0.114)PT(0.886)ENVNTPVGK                                            | 1241.6252 |
| E9QLQ9     | S(0.86)PT(0.14)GNTPPVIDSVSEK                                          | 1626.8101 |
| Q80TV8     | S(0.1)PT(0.899)GSTASR                                                 | 862.41446 |
| Q3UGS4     | S(0.509)PT(0.491)NSSEIFTPAHEENVR                                      | 2013.9392 |
| Q3UGS4     | S(0.411)PT(0.589)NSSEIFTPAHEENVR                                      | 2013.9392 |
| A2A8V9     | S(0.002)PT(0.027)PS(0.855)LS(0.116)PAR                                | 1011.5349 |
| I7HFI3     | S(0.057)PT(0.943)QLQLGK                                               | 970.54475 |
| Z4YLT8     | SPTSDDISLLHES(0.5)QS(0.5)DR                                           | 1885.8654 |
| A0A0U1RPX0 | S(1)PVCCLR                                                            | 817.41162 |
| F8SLP9     | S(1)PVDSSVLEGVK                                                       | 1215.6347 |
| P08553     | S(1)PVVEVKPKPEAK                                                      | 1436.7875 |
| D3Z5P0     | S(1)PVFSFSPEPGAGDEAR                                                  | 1748.8006 |
| P19246     | S(1)PVKEDIKPPAEAK                                                     | 1507.8246 |
| P19246     | S(1)PVKEEVK                                                           | 914.5073  |
| P08553     | S(1)PVKS(1)PEAK                                                       | 941.5182  |
| H7BX84     | S(0.005)PVPS(0.993)PPGS(0.002)PR                                      | 1076.5615 |
| Q3U5J8     | S(1)PVVELSK                                                           | 857.48583 |
| Q6ZPK7     | SPVVS(0.244)GDS(0.756)PR                                              | 999.49852 |
| A0A0A0MQC7 | SPVVSGDT(0.002)S(0.998)PR                                             | 1100.5462 |
| F6QYF8     | S(1)PVYLTVLK                                                          | 1018.6063 |
| O88737     | S(0.763)QAS(0.237)EEES(0.043)PVS(0.957)PLGRPR                         | 1824.8966 |
| H3BKM2     | SQDAT(0.061)VS(0.934)PGS(0.005)EQSEK                                  | 1548.6904 |
| H3BKM2     | SQDAT(0.058)VS(0.012)PGS(0.187)EQS(0.181)EKS(0.542)<br>)PGPIVS(0.02)R | 2342.135  |
| H3BIW0     | S(1)QDQDSEAHESR                                                       | 1500.6441 |
| Q80TV8     | S(1)QEDLNEPIKR                                                        | 1327.6732 |
| Q0VGU4     | S(1)QEEAPGHR                                                          | 1009.4577 |
| E9Q852     | S(1)QEELREEK                                                          | 1146.5517 |
| E9Q1U6     | S(1)QEIEELER                                                          | 1131.5408 |
| A0A2I3BRF4 | SQEPISNDQKVS(1)DDDKEK                                                 | 2060.9498 |
| Q9QYX7     | S(1)QESEELVVAGGGGLR                                                   | 1586.79   |
| Q9QYX7     | S(0.939)QEVT(0.061)DFLAPLQTSSR                                        | 1777.8846 |
| A0AIL1SQ76 | S(0.999)QGDS(0.001)NPAAIPHA AEDIQGDDR                                 | 2263.0101 |
| A0AIL1SQ76 | S(0.9)QGDS(0.1)NPAAIPHA AEDIQGDDR                                     | 2263.0101 |



|            |                                                                  |           |
|------------|------------------------------------------------------------------|-----------|
| Q99JP6     | S(0.001)QS(0.999)ADTPGPTER                                       | 1244.5633 |
| Q5XG69     | SQS(0.001)EEQS(0.666)EAS(0.666)S(0.666)EHLEQFTQS<br>AEK          | 2595.1209 |
| Q68FF6     | SQS(0.003)ELDDQHDYDS(0.016)VAS(0.904)DEDT(0.07<br>6)DQEPLPSAGATR | 3477.4564 |
| Q3TSE2     | S(0.037)QS(0.847)ES(0.071)S(0.044)DEVT(0.001)ELDLSH<br>GK        | 1946.8705 |
| Q3TAP5     | S(0.999)QS(0.001)KS(0.999)PT(0.001)GTPAR                         | 1215.6208 |
| F7AMS7     | S(0.008)QS(0.992)LQDQPTR                                         | 1158.5629 |
| Q3TDD8     | SQS(0.018)S(0.982)DTEQPS(0.985)PT(0.014)S(0.001)GGG<br>K         | 1648.7176 |
| A0A1B0GT26 | SQT(1)PQDTNR                                                     | 1045.4789 |
| B7ZNA3     | S(0.011)QT(0.989)PS(0.997)PS(0.002)TLSR                          | 1159.5833 |
| Q8BTI8     | S(0.71)RAS(0.289)PAT(0.001)HR                                    | 981.51043 |
| Q8BTI8     | S(1)RAS(0.999)PVS(0.001)R                                        | 858.46716 |
| B9EHJ3     | S(0.992)REDLS(0.008)AQPVQTK                                      | 1457.7474 |
| Q569Z6     | S(1)REEEWDPEYTPK                                                 | 1664.7318 |
| E9Q9N6     | S(0.058)RNS(0.942)PLLDR                                          | 1056.5676 |
| Q64369     | S(1)RPLNAVSQDGK                                                  | 1270.663  |
| C9K101     | S(0.838)RPS(0.564)S(0.535)DLNNS(0.052)T(0.01)LQS(0.0<br>01)PAHLK | 2051.0396 |
| A0A0H2UH20 | SRPS(0.5)S(0.5)PAVR                                              | 955.51993 |
| A0A0U1RNJ1 | S(0.015)RS(0.949)DT(0.036)SLK                                    | 892.46141 |
| A0A3Q4L393 | S(1)RS(0.998)GS(0.002)IIGSR                                      | 1018.552  |
| Q8C5G1     | S(1)RS(1)PLLNDRR                                                 | 1212.6687 |
| Q62093     | S(1)RS(1)PPVSK                                                   | 953.52943 |
| Q8BP78     | S(0.642)RS(0.358)PPSEEASK                                        | 1173.5626 |
| A2A8V9     | S(1)RS(0.519)PS(0.411)HT(0.071)RPR                               | 1179.6221 |
| A2A8V9     | S(1)RS(1)PS(1)PAPEK                                              | 1054.5407 |
| Q62093     | S(1)RS(0.997)RS(0.985)PPPVS(0.017)K                              | 1196.6626 |
| Q9QYG0     | S(1)RT(1)AS(0.998)LT(0.002)SAASIDGSR                             | 1578.7962 |
| Q8BTI8     | S(1)RT(1)PLTSR                                                   | 916.50903 |
| Q8BTI8     | S(1)RT(1)PPAIR                                                   | 896.5192  |
| Q8BTI8     | S(0.638)RT(0.361)PPS(0.001)APSQSR                                | 1269.6426 |
| Q8BTI8     | S(0.118)RT(0.882)PPSAPSQSR                                       | 1269.6426 |
| Q8BTI8     | S(0.997)RT(0.033)S(0.969)PVT(0.001)R                             | 902.49338 |
| Q8BTI8     | S(0.018)RT(0.67)S(0.312)PVTR                                     | 902.49338 |
| Q61301     | S(0.288)RT(0.862)S(0.825)VQT(0.025)EDDQLIAGQSAR                  | 2061.0087 |
| B7ZC24     | S(0.5)S(0.5)ADSLPGELR                                            | 1130.5568 |
| Q91W39     | S(0.5)S(0.5)ADSLPGPISR                                           | 1185.599  |
| O08599     | S(0.5)S(0.5)AS(0.001)FSTTAVSAR                                   | 1270.6153 |
| Q8BPN8     | S(0.019)S(0.981)DDIDYR                                           | 969.40395 |
| B2RXW8     | S(0.5)S(0.5)DGSLSHEDLAK                                          | 1344.6157 |
| F7ADT6     | S(0.906)S(0.094)DIVSSVR                                          | 948.48762 |
| F7ADT6     | S(0.999)S(0.001)DIVSSVR                                          | 948.48762 |

|            |                                                                               |           |
|------------|-------------------------------------------------------------------------------|-----------|
| Q8R0J5     | S(0.5)S(0.5)DKLNLVTK                                                          | 1103.6186 |
| F6TZK4     | S(0.5)S(0.5)DSDVSDVSAISR                                                      | 1423.6427 |
| A0A1Y7VLD6 | S(0.002)S(0.002)DWS(0.997)S(0.999)EEEEPVK                                     | 1663.7326 |
| Q68FG2     | S(0.775)S(0.225)EAAHGATLPTR                                                   | 1296.6422 |
| O55201     | S(0.5)S(0.5)EAEAEVEEDQR                                                       | 1606.6595 |
| Q9D898     | S(0.5)S(0.5)EIEQAVQSLDR                                                       | 1460.7107 |
| E9Q9N6     | S(0.5)S(0.5)ELEGDTITLKPR                                                      | 1544.8046 |
| E9Q9Q4     | S(0.022)S(0.978)FLNAK                                                         | 765.4021  |
| B0R0E3     | S(0.364)S(0.636)GGAEDDIPQGER                                                  | 1416.6117 |
| B0R0E3     | S(0.5)S(0.5)GGAEDDIPQGERK                                                     | 1544.7067 |
| E9Q9Q7     | S(0.903)S(0.097)GREEDEEELLR                                                   | 1547.7063 |
| E9Q9Q7     | S(1)SGREEDEEELLR                                                              | 1547.7063 |
| P58871     | S(0.021)S(0.021)GS(0.161)LS(0.796)PGLLETEDPLEAR                               | 1843.88   |
| A0A1B0GT26 | SSHCD(1)PPR                                                                   | 1041.4298 |
| Q9EPM7     | S(0.5)S(0.5)HETLNVVEEK                                                        | 1370.6678 |
| Q9EPM7     | S(1)S(1)HETLNVVEEK                                                            | 1370.6678 |
| A0A1W2P762 | S(0.5)S(0.5)HGNSLFLR                                                          | 1116.5676 |
| A0A1W2P762 | S(1)S(1)HGNSLFLR                                                              | 1116.5676 |
| Q9JL04     | SSILES(1)PKK                                                                  | 987.56006 |
| E9PXA8     | SSILPFT(1)PPVVK                                                               | 1283.7489 |
| H3BLB0     | S(0.312)S(0.312)KS(0.312)DKCFT(0.087)HQIHL(0.98)IH<br>QGIHT(0.997)EEK         | 2946.4406 |
| Q3TDU7     | S(0.007)S(0.008)LAET(0.031)LDS(0.461)T(0.514)GS(0.978<br>)LDPQR               | 1775.8537 |
| Q6PD32     | S(0.215)S(0.785)PQLDPLRK                                                      | 1302.5939 |
| A0A1D5RM83 | S(0.5)S(0.5)LETGSSLSTDR                                                       | 1338.6263 |
| A2ARP8     | SSLLD(0.006)VT(0.158)S(0.77)IPS(0.033)S(0.033)R                               | 1574.8516 |
| Q8CDV2     | S(0.5)S(0.5)LNSINSSDAK                                                        | 1221.5837 |
| A0A0R4J0D3 | S(0.001)S(0.001)LNS(0.913)S(0.556)PWS(0.388)GLMALG<br>NS(0.142)R              | 1862.8945 |
| Q3UYC0     | S(0.5)S(0.5)LPNGEGLQLK                                                        | 1241.6616 |
| Q3UHH0     | S(0.469)S(0.515)LY(0.016)EGLEKPEER                                            | 1493.7362 |
| Q9D066     | S(0.5)S(0.5)PADLVTVDQK                                                        | 1359.6882 |
| Q3UT39     | S(0.5)S(0.5)PALAAPDASVDPK                                                     | 1424.7147 |
| Q61548     | S(0.37)S(0.63)PATTVT(0.002)S(0.998)PNSTPAK                                    | 1544.7682 |
| Q61548     | SSPAT(0.003)T(0.84)VT(0.008)S(0.145)PNS(0.004)TPAK                            | 1544.7682 |
| A0A1D5RLB2 | S(0.058)S(0.942)PCLDR                                                         | 833.37015 |
| E9QMX4     | S(0.5)S(0.5)PDQFLFSSLR                                                        | 1382.683  |
| S4R2F3     | S(0.5)S(0.5)PEDVVVTNSSNR                                                      | 1489.7009 |
| A0A087WRM8 | S(0.5)S(0.5)PEIQEPIKPLEK                                                      | 1593.8614 |
| O88852     | S(0.5)S(0.5)PERDEGTPVPDSR                                                     | 1627.7438 |
| E9Q852     | SSPNVANQPPS(1)PGGK                                                            | 1435.7056 |
| E9Q6E5     | S(0.473)S(0.525)PPAPGT(0.206)AGPT(0.194)S(0.554)PS(0<br>.046)VALT(0.001)NLALR | 2261.2016 |
| Q8K2L2     | S(0.5)S(0.5)PPASPTIIPR                                                        | 1221.6717 |

|            |                                                                                                       |           |
|------------|-------------------------------------------------------------------------------------------------------|-----------|
| A0A498WFS2 | S(0.124)S(0.124)PPAT(0.752)DPGPVPSSPSQEPPTK                                                           | 2159.0382 |
| F6RUK9     | S(0.5)S(0.5)PPPLPAK                                                                                   | 892.50182 |
| A6X919     | S(0.481)S(0.481)PPPLS(0.038)GASEVDAGELGSER                                                            | 2040.96   |
| E9QP01     | S(0.5)S(0.5)PPPPLPAERPGTK                                                                             | 1658.8628 |
| A0A2I3BPY7 | S(0.5)S(0.5)PPVEHPAGTSTTDNDVIIR                                                                       | 2192.0709 |
| A0A0U1RP90 | S(0.716)S(0.284)PQLDPLRK                                                                              | 1139.6299 |
| A0A0U1RP90 | S(0.516)S(0.484)PQLDPLRK                                                                              | 1139.6299 |
| Q8C8L2     | S(0.5)S(0.5)PQPAAAAAR                                                                                 | 1025.5254 |
| D6RI74     | S(0.637)S(0.362)PS(0.001)EVSLEAER                                                                     | 1289.6099 |
| B1AZA5     | S(0.167)S(0.798)PS(0.035)SPSPTLGR                                                                     | 1171.5833 |
| A0A087WP91 | S(0.5)S(0.5)PSSSPSLR                                                                                  | 1003.4934 |
| A0A338P6P6 | SSPS(0.003)T(0.023)GS(0.344)LDS(0.621)GNES(0.009)K                                                    | 1451.6376 |
| Q80XK6     | S(0.5)S(0.5)PVCSTAPVETEPK                                                                             | 1587.745  |
| Q5NBZ7     | S(0.243)S(0.757)PVESLKK                                                                               | 973.54441 |
| F6Y765     | S(0.014)S(0.014)S(0.971)AENQEGDPGTDK                                                                  | 1520.6227 |
| E9PVC7     | SSSAGKES(1)PK                                                                                         | 976.48254 |
| Q8BTI8     | SS(0.006)S(0.994)AS(1)PELK                                                                            | 904.45018 |
| Q9Z2D6     | SSS(0.001)AS(0.139)S(0.86)PPK                                                                         | 846.40831 |
| B8JF6      | S(0.11)S(0.11)S(0.78)CESLGAQLPAAR                                                                     | 1532.7253 |
| A0A3Q4EHL1 | S(0.004)S(0.017)S(0.979)DAQLSR                                                                        | 949.44649 |
| Q9QXZ0     | S(0.394)S(0.569)S(0.036)DEETLSER                                                                      | 1238.5263 |
| Q8BTI8     | S(0.4)S(0.553)S(0.046)ELS(1)PEVVEK                                                                    | 1289.6351 |
| B7ZN48     | S(0.002)S(0.002)S(0.996)IS(0.078)S(0.922)IDKDSK                                                       | 1252.6147 |
| Q8K124     | SS(0.002)S(0.997)LGDLLR                                                                               | 946.50836 |
| O70161     | SSS(0.999)LKS(0.651)S(0.349)PSK                                                                       | 1006.5295 |
| Q9WV69     | SSS(1)LPSYGR                                                                                          | 952.46141 |
| A0A5F8MPN1 | S(0.667)S(0.667)S(0.667)PDLSSSSK                                                                      | 1080.4935 |
| A0A2X0SSA9 | S(0.002)S(0.003)S(0.995)PEPVTHLK                                                                      | 1180.6088 |
| Q569Z6     | SSS(1)PPPR                                                                                            | 726.36605 |
| A0A0A0MQL5 | S(0.012)S(0.012)S(0.977)PVLVEEPPER                                                                    | 1456.7046 |
| O88568     | S(0.007)S(0.038)S(0.955)PVNVKK                                                                        | 944.5291  |
| Q8BTI8     | S(0.001)S(0.003)S(0.996)PVTELTAR                                                                      | 1146.5881 |
| A0A0R4J124 | SSS(1)SERPEPQQK                                                                                       | 1358.6426 |
| F7CUD4     | SS(0.003)S(0.994)S(0.002)GSLNAR                                                                       | 964.45739 |
| A0A5F8MPE1 | SSS(0.002)S(0.014)KLS(0.984)R                                                                         | 850.45084 |
| A0A5F8MPE1 | SSS(0.402)S(0.014)KLS(0.584)R                                                                         | 850.45084 |
| Q3UR37     | SSSSAS(0.003)PS(0.543)S(0.299)PS(0.056)S(0.099)R                                                      | 1309.5746 |
| F6WXQ4     | SSS(1)VTSIDK                                                                                          | 922.46074 |
| F6WXQ4     | S(0.388)S(0.528)S(0.084)VT(0.056)S(0.943)IDKESR                                                       | 1294.6365 |
| O35954     | S(0.001)S(0.002)T(0.002)EARPGT(0.009)S(0.009)T(0.029)<br>AGT(0.949)PDGPEAPPGPDAS(0.977)PDAS(0.023)FGK | 3211.4542 |
| Q544Y7     | SST(1)PEEVK                                                                                           | 875.42363 |
| Q78WP6     | S(0.617)S(0.648)T(0.576)PLPT(0.151)VS(0.006)S(0.001)S<br>AENTR                                        | 1632.7955 |

|            |                                                               |           |
|------------|---------------------------------------------------------------|-----------|
| Q78WP6     | S(0.458)S(0.556)T(0.986)PLPTVSSSAENTR                         | 1632.7955 |
| Q8BTI8     | S(0.886)S(0.052)T(0.063)PPRQS(0.891)PS(0.108)R                | 1198.6054 |
| Q8BTI8     | S(0.268)S(0.366)T(0.366)PPRQS(0.862)PS(0.138)R                | 1198.6054 |
| A0A668KLC6 | SSVAS(1)PR                                                    | 702.36605 |
| F6YBV1     | STDSEVS(0.001)QS(0.999)PAK                                    | 1234.5677 |
| Q6P9T5     | S(0.5)T(0.5)EDEEKDDGEPGR                                      | 1562.6332 |
| A0A2R8W6N3 | STEES(0.012)LS(0.988)EDAFTES(0.002)ELS(0.998)PIRE<br>ELLSSEPR | 3266.5314 |
| Q3U8N2     | STGDSQNLGSS(0.017)S(0.982)PGR                                 | 1448.6492 |
| Q6P1F1     | STHPS(1)PEKK                                                  | 1009.5193 |
| Q9QYB8     | S(0.396)T(0.604)PAS(1)PVQS(0.93)PS(0.07)K                     | 1184.6037 |
| Q8BLA0     | STPFIVPS(0.004)S(0.911)PT(0.085)EQGGR                         | 1658.8264 |
| Q2WF71     | S(0.5)T(0.5)PHLDGAGGGAAGEDGDLGLGSAR                           | 2237.0309 |
| D3Z5P0     | STPLPGPPGS(1)PR                                               | 1161.6142 |
| G3UW55     | STPQPAAPES(0.993)PT(0.007)EGPR                                | 1620.7744 |
| A0A1D5RLS1 | STPSHGVSSSLNS(0.056)T(0.109)GS(0.849)LS(0.985)PK              | 1928.9439 |
| A0A0A0MQC7 | S(0.498)T(0.498)PT(0.003)AEDVTAPLVDER                         | 1699.8265 |
| A0A2X0SSA9 | STQKS(0.964)PAT(0.036)APK                                     | 1114.5982 |
| A0A2X0SSA9 | STQKS(0.982)PAT(0.018)APK                                     | 1114.5982 |
| Q8BTI8     | S(0.499)T(0.499)S(0.001)ADSASSSDTSR                           | 1357.5593 |
| Q8K4P8     | STS(0.999)DTDLVTSDSR                                          | 1382.6161 |
| Q9Z0R4     | S(0.042)T(0.042)S(0.917)IDTGPTESPASLK                         | 1589.7784 |
| Q3UR88     | S(0.162)T(0.162)S(0.676)PAPADVAPAQEDLR                        | 1723.8377 |
| Q9WV69     | S(0.014)T(0.014)S(0.973)PPPSPEVWAESR                          | 1625.7686 |
| Q9QZA3     | STS(0.999)QQGEEPQK                                            | 1217.5524 |
| A0A0R4J2D7 | S(0.125)T(0.125)S(0.635)S(0.115)GETSSGLDADGHFKPS<br>PQPR      | 2444.1204 |
| Q14CH0     | STVEDFEANT(0.073)S(0.829)PT(0.098)K                           | 1524.6944 |
| E9Q912     | SVAQQAS(0.755)LT(0.245)EQR                                    | 1316.6684 |
| Q8K004     | S(1)VDAVDSYWESR                                               | 1476.6157 |
| A0A0R4J093 | S(1)VDEVFGEVVK                                                | 1206.6132 |
| Q99L69     | S(1)VDEVNYWDK                                                 | 1253.5564 |
| Q3TB04     | SVDIS(0.934)PT(0.066)R                                        | 873.4556  |
| A0A5H1ZRL1 | S(1)VDKSDEELQFVK                                              | 1520.7359 |
| A0A1L1SST3 | S(1)VEDDKGHLVCR                                               | 1542.7097 |
| Q3TGW2     | S(1)VEDLVR                                                    | 816.43413 |
| P84309     | S(1)VELGLEER                                                  | 1030.5295 |
| D6RI80     | S(1)VENLPECGITHEQR                                            | 1767.821  |
| Q05D44     | SVPTVDS(1)GNEDDDSSFK                                          | 1797.7541 |
| A0A589P973 | SVQPEVELS(0.006)GGS(0.215)GS(0.779)GGDEGADESR                 | 2304.9942 |
| D6RJK7     | SVSEINS(1)DDELPGK                                             | 1488.6944 |
| A0A2R8W718 | S(0.015)VS(0.094)ES(0.105)HT(0.785)PCPS(0.001)ESTGD<br>TVPLQR | 2370.0758 |
| A2A8V9     | SVSGS(1)PEPAAK                                                | 1028.5138 |

|            |                                                                         |           |
|------------|-------------------------------------------------------------------------|-----------|
| B2RRE3     | S(0.001)VS(0.999)NEGLTLNNSR                                             | 1389.6848 |
| B2RRE3     | SVS(1)NEGLTLNNSR                                                        | 1389.6848 |
| B2RQQ5     | SVSPGVTQAVVEEHCAS(1)PEEK                                                | 2239.0427 |
| Q3TPE7     | S(1)VS(1)PVAEEHTR                                                       | 1210.5942 |
| Q5DTP6     | S(0.002)VS(0.961)T(0.037)DELGPPGR                                       | 1213.5939 |
| Q544I1     | S(0.031)VT(0.254)S(0.249)NQS(0.291)DGT(0.346)QES(0.817)CES(0.013)PDVLDR | 2410.019  |
| Q544I1     | S(0.016)VT(0.091)S(0.14)NQS(0.266)DGT(0.468)QES(0.024)CES(0.995)PDVLDR  | 2410.019  |
| S4R1M2     | SVVS(1)FDK                                                              | 780.40177 |
| Q5DTT2     | S(1)WDLGGISAPR                                                          | 1157.5829 |
| H3BKM2     | S(1)WESSSPVDRPELEAASPTTR                                                | 2301.0873 |
| A0A0R4J2D4 | S(1)YEDLTELEDR                                                          | 1368.6045 |
| P607I0     | S(0.997)Y(0.003)ELPDGQVITIGNER                                          | 1789.8846 |
| S4R2F3     | S(0.999)Y(0.001)IETETESR                                                | 1213.5463 |
| Q569Z6     | S(0.891)Y(0.11)S(1)PAHNR                                                | 930.43078 |
| Q5BL18     | SYS(1)PDGK                                                              | 752.33408 |
| Q5BL18     | S(0.007)Y(0.012)S(0.981)PDGKES(0.974)PS(0.026)DKK                       | 1523.7104 |
| C9K0Z8     | TAAPS(1)PDRR                                                            | 969.49919 |
| P63101     | TAFDEAIAELDT(0.023)LS(0.836)EES(0.14)YK                                 | 2130.9845 |
| Q8BX70     | TANAS(1)LEEIIDK                                                         | 1302.6667 |
| E0CXR5     | T(0.031)AQDPGIS(0.944)PS(0.023)QS(0.001)LCAESSR                         | 1989.9062 |
| Q80TU6     | TAQVPS(1)PPR                                                            | 951.51378 |
| Q05D44     | TARPNSEAPLS(0.969)GS(0.031)EDADDSNK                                     | 2159.9567 |
| H3BIW6     | TAS(1)APTK                                                              | 674.3599  |
| Q8CGI9     | TASAVAGKT(1)PDAS(1)PEPK                                                 | 1625.8261 |
| F8WHU5     | T(0.006)AS(0.963)DS(0.031)DEQQWPEEK                                     | 1648.6853 |
| I3PQW3     | TAS(1)EGSEAETPEAPK                                                      | 1502.6736 |
| Q80TW3     | TAS(1)EPNLK                                                             | 858.4447  |
| Q545R3     | TAS(0.999)GS(0.001)SVTSLEGTR                                            | 1351.6579 |
| Q545R3     | TAS(0.995)GS(0.005)SVTSLEGTR                                            | 1351.6579 |
| Q545R3     | TAS(0.975)GS(0.025)SVTSLEGTR                                            | 1351.6579 |
| Q9QYG0     | TAS(1)LTSAASIDGSR                                                       | 1335.663  |
| Q9QYG0     | T(1)AS(0.999)LT(0.001)SAASIDGSR                                         | 1335.663  |
| Q9QYG0     | T(0.041)AS(0.135)LT(0.895)S(0.728)AAS(0.196)IDGS(0.005)R                | 1335.663  |
| A0A1D5RM17 | T(0.005)AS(0.995)LTSASSVDGSR                                            | 1337.6423 |
| A0A1D5RM17 | T(0.001)AS(0.999)LTSASSVDGSR                                            | 1337.6423 |
| A2A8V9     | TAS(1)PPPPPK                                                            | 890.48617 |
| Q80TZ3     | TATSASAS(0.983)PT(0.016)LR                                              | 1161.599  |
| P52479     | T(0.544)CDS(0.456)PQNPVDFISGPVDPSPFPR                                   | 2528.1642 |
| Q8VH52     | TCFS(1)PNR                                                              | 880.38614 |
| Q3UXI0     | TCS(1)LPDLSK                                                            | 1019.4957 |
| F6Q8P7     | TDDVS(1)EK                                                              | 792.35013 |

|            |                                                                         |           |
|------------|-------------------------------------------------------------------------|-----------|
| F6Q8P7     | TDDVSEKT(0.016)S(0.984)LADQEEVR                                         | 1920.8912 |
| F6Q8P7     | TDDVSEKT(0.416)S(0.584)LADQEEVR                                         | 1920.8912 |
| Q80Y83     | TDEPDS(0.735)PS(0.198)S(0.067)R                                         | 1089.4574 |
| B2RWX7     | TDGEAS(1)PLKEAETK                                                       | 1474.7151 |
| Q6P5B5     | T(0.011)DGS(0.989)IS(1)GDR                                              | 906.40429 |
| Q6P5B5     | T(0.007)DGS(0.993)IS(1)GDRQPVTVADYISR                                   | 2136.0447 |
| A0A0A0MQC7 | TDHGAEIVY(0.998)KS(0.999)PVVS(0.002)GDTSPR                              | 2214.0917 |
| B9EHS3     | TDPGS(1)IENLCPGK                                                        | 1386.6449 |
| A0A1D5RLA4 | T(0.44)DRT(0.612)PAT(0.947)PEEDLDETTTR                                  | 2046.9342 |
| Q569Z6     | TDSEKPFGRS(1)QS(1)PK                                                    | 1562.7689 |
| B9EKJ3     | TDS(1)IGEK                                                              | 748.3603  |
| A0A5F8MPB7 | TDS(1)QSEAVAIQAIR                                                       | 1487.758  |
| A2AI69     | T(0.451)DS(0.513)REDEIS(0.036)PPPPNPVVK                                 | 1975.9851 |
| A2AI69     | T(0.324)DS(0.673)REDEIS(0.003)PPPPNPVVK                                 | 1975.9851 |
| A2AI69     | T(0.251)DS(0.713)REDEIS(0.036)PPPPNPVVK                                 | 1975.9851 |
| F7DCW4     | TDS(0.112)S(0.888)PNQAR                                                 | 974.44174 |
| F7DCW4     | TDS(0.322)S(0.678)PNQAR                                                 | 974.44174 |
| F7DCW4     | TDS(0.164)S(0.836)PNQAR                                                 | 974.44174 |
| E9QLQ9     | TDSTESSGAQS(1)PK                                                        | 1293.5685 |
| A0A5F8MPE1 | TDTAADGETSAT(0.001)ES(0.999)DQEEDAEIK                                   | 2411.9936 |
| P70268     | TDVSNFDEEFTGEAPT(0.017)LS(0.983)PPR                                     | 2308.0495 |
| A0A1Y7VM80 | T(0.082)EADS(0.9)T(0.162)S(0.855)EGPEDEAQR                              | 1720.7024 |
| F6R8S6     | T(0.019)EARS(0.99)S(0.99)DEENGPPS(0.841)S(0.159)PD<br>LDR               | 2157.941  |
| A2ARP8     | TEATQGLDYVPS(0.007)AGT(0.011)IS(0.981)PT(0.032)S(<br>0.319)S(0.65)LEEDK | 2695.2712 |
| A0A3B2W7M7 | TECFLPPS(0.112)S(0.112)S(0.639)PS(0.138)EHR                             | 1729.773  |
| F7AVI9     | T(0.162)EDGGWEWS(0.838)DDEFDEESEEGR                                     | 2502.9208 |
| A0A0A6YY91 | TEEERT(1)PNHDGGK                                                        | 1468.6542 |
| A0A3Q4L314 | TEEVES(1)EEDPILEHPPENPVK                                                | 2644.2392 |
| Q05C56     | TEEVLS(1)PDGSPSK                                                        | 1344.6409 |
| Q05C56     | TEEVLS(0.004)PDGS(0.759)PS(0.28)KS(0.887)PS(0.07)K<br>K                 | 1871.9476 |
| E9Q2E4     | TEGT(1)PPPPGQPAK                                                        | 1275.6459 |
| D3YYE6     | TEQELPRPQS(0.984)PS(0.016)DLDSLDR                                       | 2239.0717 |
| D3YYE6     | TEQELPRPQS(0.784)PS(0.216)DLDSLDR                                       | 2239.0717 |
| D3YYE6     | TEQELPRPQS(0.684)PS(0.316)DLDSLDR                                       | 2239.0717 |
| Q543Y7     | TEQSVT(1)PEQQK                                                          | 1273.615  |
| Q4FJY3     | T(0.024)ES(0.976)GETLAGDSDFSLKPEK                                       | 2009.9429 |
| Q5BL18     | TES(1)PAEGK                                                             | 817.38176 |
| Q9QYB8     | TESVT(0.047)S(0.869)GPLS(0.134)PEGS(0.819)PS(0.131)<br>K                | 1658.7999 |
| Q9QYB8     | TESVTSGPLSPEGS(0.146)PS(0.547)KS(0.27)PS(0.037)K                        | 2058.0117 |
| Q9D0R8     | T(0.006)ET(0.994)PPPLASLNVSK                                            | 1452.7824 |
| Q5M9P7     | TFS(1)ATVR                                                              | 780.413   |

|            |                                                                                                         |           |
|------------|---------------------------------------------------------------------------------------------------------|-----------|
| A0A3B2W7M7 | T(0.163)GEP(S(0.837)PPHDVLEPPDT(0.221)VS(0.779)DDKDHGK                                                  | 2920.3111 |
| D3Z379     | T(0.001)GES(0.152)ARS(0.847)EDDAAS(1)GEHDIQIEGVR                                                        | 2528.1375 |
| Q9ESN6     | T(0.009)GNAY(0.117)LT(0.436)AELS(0.219)T(0.219)PDGS(0.001)VADGEILDNK                                    | 2650.261  |
| Q9Z0H8     | T(0.001)GNES(0.998)GS(0.002)NLS(0.91)DS(0.081)GS(0.008)VK                                               | 1537.6856 |
| B7ZNJ3     | T(0.183)GS(0.169)EPS(0.547)PPQGGGS(0.097)LGPS(0.004)APPEIIVLR                                           | 2701.3348 |
| Q6PNC0     | TGS(1)ES(0.397)S(0.603)LKK                                                                              | 935.49238 |
| Q6PNC0     | TGS(1)ES(0.497)S(0.503)LKK                                                                              | 935.49238 |
| Q3TDD8     | T(0.541)GS(0.458)ES(0.001)SQTGASATSGR                                                                   | 1482.6546 |
| F7CPX0     | T(0.002)GS(0.998)PLTVATGASSPAR                                                                          | 1471.7631 |
| Q3UGH4     | T(0.045)GS(0.955)PLTVATGNDQAATEAK                                                                       | 1830.8959 |
| Q6P1F1     | TGS(0.001)S(0.999)PTQGIVNK                                                                              | 1187.6146 |
| Q8CAF8     | T(0.003)GS(0.98)S(0.017)TNNNEEEK                                                                        | 1308.543  |
| Q8CAF8     | T(0.735)GS(0.648)S(0.542)T(0.075)NNNEEEK                                                                | 1308.543  |
| Q8CAF8     | T(0.835)GS(0.548)S(0.542)T(0.075)NNNEEEK                                                                | 1308.543  |
| Q6ZQ55     | TGSVQT(0.002)S(0.998)PSSTPGTGR                                                                          | 1518.7274 |
| Q9D2H3     | TGTF(1)PQR                                                                                              | 892.44028 |
| A0A668KLC6 | TGVIQT(0.002)S(0.917)T(0.081)EQSFSK                                                                     | 1511.7468 |
| S4R2F3     | THPAVS(0.996)PS(0.003)SK                                                                                | 1009.5193 |
| B9EKC3     | THS(1)DASDDEAFTTSK                                                                                      | 1610.6696 |
| Q9CYT6     | T(0.003)HT(0.997)PS(1)PT(0.773)S(0.227)PK                                                               | 1051.5298 |
| Q9CYT6     | T(0.033)HT(0.968)PS(0.993)PT(0.92)S(0.086)PK                                                            | 1051.5298 |
| B2RSY3     | THT(0.809)S(0.191)PPR                                                                                   | 794.4035  |
| Q8BXV7     | T(1)IPGGFR                                                                                              | 746.40752 |
| A0A0G2JFM9 | TIS(1)DGTISAAK                                                                                          | 1062.5557 |
| Q91VU5     | T(1)KNPLDQETK                                                                                           | 1172.6037 |
| Q8BTI8     | T(0.96)KS(0.04)HT(0.999)PPR                                                                             | 922.49846 |
| Q8BTI8     | T(0.385)KS(0.615)HT(1)PPR                                                                               | 922.49846 |
| Q3UEX8     | T(0.505)KS(0.495)PAEEELTPSAVVR                                                                          | 1712.8945 |
| B2RQQ5     | T(0.002)LEVVS(0.76)PS(0.525)QS(0.208)VT(0.214)GS(0.215)AGHT(0.069)PY(0.015)Y(0.011)QS(0.81)PT(0.172)DEK | 2964.3989 |
| B9EHS3     | TLHS(1)PPLQLR                                                                                           | 1160.6666 |
| Q9JMJ6     | T(0.004)LNQLGT(0.996)PQDSPELR                                                                           | 1667.8479 |
| E9PV14     | TLPHEPPS(0.002)EAS(0.998)PGQVEER                                                                        | 1958.9334 |
| Q4VBF8     | TLS(1)DESIYSSQR                                                                                         | 1384.647  |
| Q5EBP0     | TLS(1)DESVCSNR                                                                                          | 1266.551  |
| E9QMJ1     | T(0.003)LS(0.997)DPPSPLPHGPPNK                                                                          | 1652.8522 |
| E9QMJ1     | T(0.302)LS(0.698)DPPSPLPHGPPNK                                                                          | 1652.8522 |
| E9QMJ1     | T(0.202)LS(0.898)DPPSPLPHGPPNK                                                                          | 1652.8522 |
| Q62467     | TLS(1)EDDFR                                                                                             | 981.44034 |
| Q9D6W8     | T(0.04)LS(0.96)GEEEAESVGVSSR                                                                            | 1635.7588 |

|            |                                                                              |           |
|------------|------------------------------------------------------------------------------|-----------|
| E9Q9Q7     | TLS(0.999)PT(0.001)PSAEGYQDVR                                                | 1619.7791 |
| Q3UID0     | TLTDEVNS(1)PDSDRR                                                            | 1603.7438 |
| Q8CE89     | TLTEGDS(0.003)PS(0.997)PQ                                                    | 1130.5091 |
| Q8CE89     | TLTEGDS(0.317)PS(0.683)PQ                                                    | 1130.5091 |
| Q8CE89     | TLTEGDS(0.103)PS(0.897)PQ                                                    | 1130.5091 |
| Q5DTY9     | TLTS(0.001)GS(0.999)R                                                        | 720.37662 |
| Q7TSZ9     | TMGMSS(0.001)DDAY(0.999)RFVKDR                                               | 1877.84   |
| D3Z1L8     | TNS(1)LEEK                                                                   | 819.39741 |
| Q3TAB8     | T(0.029)NS(0.955)S(0.033)DS(0.619)ERS(0.364)PDLGHST<br>QIPR                  | 2183.0203 |
| Q3TAB8     | T(0.029)NS(0.855)S(0.133)DS(0.619)ERS(0.364)PDLGHST<br>QIPR                  | 2183.0203 |
| Q3TAB8     | T(0.029)NS(0.955)S(0.233)DS(0.619)ERS(0.164)PDLGHST<br>QIPR                  | 2183.0203 |
| Q8CE19     | TPALS(1)PQR                                                                  | 868.47667 |
| Q8CE19     | T(0.999)PALS(0.977)PQRPLT(0.011)T(0.011)QQPQS(0.00<br>1)GT(0.001)LK          | 2248.2175 |
| Z4YKC4     | T(1)PDEVLEAEAEPK                                                             | 1426.6828 |
| G1JLS7     | T(1)PDIAQR                                                                   | 799.41882 |
| S4R2F3     | TPDS(1)LEPSPLK                                                               | 1182.6132 |
| S4R2F3     | TPDSLEPSPLKES(1)PCR                                                          | 1811.8724 |
| B2RQQ5     | T(1)PEDGGYTCEITEK                                                            | 1598.677  |
| S4R2F3     | TPEDIS(0.048)T(0.951)PPEGT(0.001)KPCLQTPVTSER                                | 2639.2749 |
| S4R2F3     | TPEDIS(0.082)T(0.915)PPEGT(0.073)KPCLQT(0.224)PVT<br>(0.537)S(0.169)ER       | 2639.2749 |
| S4R2F3     | T(0.001)PEDIS(0.177)T(0.827)PPEGT(0.18)KPCLQT(0.78<br>3)PVT(0.024)S(0.009)ER | 2639.2749 |
| B2RQQ5     | T(1)PEEGGYSYEISEK                                                            | 1587.694  |
| Q6NV50     | TPEELDDS(1)DFETEDFDVR                                                        | 2157.8862 |
| Q61301     | TPEELEDDES(1)DFEQEDYDVR                                                      | 2329.9346 |
| A4GE65     | TPEELEDVS(1)DLEDDHEVR                                                        | 2125.9288 |
| Q8CIW8     | T(0.998)PEELT(0.002)ILGETQEEDEILPR                                           | 2440.1857 |
| Q80VP1     | T(0.475)PES(0.525)FLGPNAALVDLDSLVR                                           | 2200.1376 |
| E9Q7S0     | T(0.001)PGPPS(0.014)S(0.014)QGS(0.971)PVDTPAAQK                              | 1948.949  |
| Q9EPN1     | TPLENVPGNLS(1)PIKDPDR                                                        | 1961.0218 |
| Q6W8Q3     | TPPAANQAS(1)DPEEK                                                            | 1453.6685 |
| Q6W8Q3     | T(1)PPAANQASDPEEK                                                            | 1453.6685 |
| A0A0A0MQC7 | T(1)PPGSGEPPK                                                                | 965.48181 |
| Q542T4     | T(1)PPPSQGK                                                                  | 810.42357 |
| P04370     | T(1)PPPSQKGGR                                                                | 1080.5676 |
| Q9QYX7     | TPPS(0.001)NLS(0.999)PIEDAS(0.877)PT(0.123)EELR                              | 2052.0011 |
| E0CXZ5     | T(0.971)PPS(0.025)T(0.004)PPATANLSADDDFQNTDLR                                | 2543.1776 |
| Q8BTI8     | T(1)PPVALSSSR                                                                | 1013.5506 |
| Q3TN35     | T(0.001)PS(0.924)AS(0.075)HEEQQE                                             | 1241.516  |
| Q3TN35     | T(0.001)PS(0.954)AS(0.045)HEEQQE                                             | 1241.516  |
| Q3UH86     | T(0.001)PS(0.999)EAER                                                        | 788.36645 |



|            |                                                                                              |           |
|------------|----------------------------------------------------------------------------------------------|-----------|
| P54731     | TPS(1)GEFLER                                                                                 | 1034.5033 |
| B7ZNF6     | TPSIS(1)PVR                                                                                  | 855.48142 |
| E9Q9D6     | TPS(1)KEDVEK                                                                                 | 1031.5135 |
| A0A0A0MQC7 | T(0.001)PS(0.999)LPTPPTTR                                                                    | 1065.5819 |
| Q9CPS8     | T(0.004)PS(0.996)PGEQQVQEVK                                                                  | 1553.7686 |
| Q14DK3     | T(0.006)PS(0.994)PPEPEPAGTAQK                                                                | 1505.7362 |
| Q14DK3     | T(0.046)PS(0.954)PPEPEPAGTAQK                                                                | 1505.7362 |
| A0A1L1SQE2 | TPTADDS(0.999)DDS(0.001)REK                                                                  | 1435.6063 |
| S4R2F3     | T(0.158)PT(0.141)EEGT(0.673)PT(0.014)S(0.014)EQNPFL<br>FQEGK                                 | 2336.0808 |
| D3YUV1     | T(0.005)PT(0.995)PEPAEVETR                                                                   | 1325.6463 |
| D3YUV1     | T(0.205)PT(0.795)PEPAEVETR                                                                   | 1325.6463 |
| P19246     | T(1)PVKEGAK                                                                                  | 828.47052 |
| B2RQQ5     | T(1)PVQDHR                                                                                   | 851.42496 |
| F7AAP4     | TQDGVALEIQPLNS(0.998)QEGLDS(0.002)EDK                                                        | 2485.182  |
| H7BX84     | TQESCGIAPLT(0.092)PS(0.294)QS(0.613)PKPEAR                                                   | 2253.1059 |
| O70161     | T(0.539)QS(0.794)S(0.667)GQDGRPQEEPHAEDLQK                                                   | 2336.0629 |
| A0A067XG53 | TQSS(0.002)S(0.998)CEDLPSTTQPK                                                               | 1764.7836 |
| Q91VJ0     | TQSSCERDS(0.955)PS(0.045)T(0.001)SR                                                          | 1683.7118 |
| Q9QYX7     | TQT(1)PSETR                                                                                  | 918.44067 |
| E9Q852     | TQVLS(0.995)PDS(0.004)LFTAK                                                                  | 1405.7453 |
| E9Q3M9     | T(0.587)RS(0.413)PEQPGTKPPLPR                                                                | 1659.9057 |
| F6RUK9     | T(0.557)RS(0.55)PS(0.847)PT(0.046)LGESLAPR                                                   | 1567.8318 |
| Q61301     | TSAT(0.039)S(0.961)PIILK                                                                     | 1029.607  |
| Q99P72     | TSDS(1)KEEIK                                                                                 | 1035.5084 |
| Q80T68     | TSDVNDTQPPQS(1)E                                                                             | 1416.6005 |
| Q3UYQ4     | TSEDTS(0.002)GS(0.998)PPK                                                                    | 1191.5255 |
| Q69ZX8     | TSET(0.016)S(0.322)IS(0.659)PPGS(0.001)SIGSPNR                                               | 1772.8541 |
| Q64511     | T(0.019)S(0.019)FDQDS(0.963)DVDIFPSDFTSEPPALPR                                               | 2782.261  |
| Q3UVZ8     | T(0.443)S(0.536)FS(0.022)VGS(0.999)DDELGPIR                                                  | 1578.7526 |
| A0A0J9YUE9 | T(0.5)S(0.5)GNQDEILVIR                                                                       | 1343.7045 |
| Q8BR43     | T(0.277)S(0.723)INSLR                                                                        | 789.43447 |
| Q62093     | T(0.012)S(0.988)PDTLR                                                                        | 788.40283 |
| A0A140LHI9 | T(0.5)S(0.5)PEQDLPAEAPTATVQPPR                                                               | 2104.0437 |
| A0A494BAD8 | T(0.5)S(0.5)PQELSEVSR                                                                        | 1360.647  |
| P49586     | T(0.169)S(0.831)PS(0.005)S(0.083)S(0.881)PAS(0.029)LS(<br>0.002)R                            | 1175.5782 |
| D3Z6G3     | T(0.001)S(0.998)PTGPK                                                                        | 686.3599  |
| D3YYR9     | T(0.373)S(0.453)S(0.173)ES(0.001)IVSVPAS(0.001)S(0.00<br>3)T(0.02)S(0.15)GS(0.653)PS(0.173)R | 1921.9229 |
| D3Z7E5     | TSSFAEPGGGGGGGGGGGGPGRS(0.08)AS(0.897)GPGGT(<br>0.023)GGGK                                   | 2432.0589 |
| Q62261     | T(0.625)S(0.678)S(0.694)KES(0.51)S(0.493)PVPS(0.916)P<br>T(0.083)LDR                         | 1686.8424 |
| Q62261     | T(0.625)S(0.644)S(0.646)KES(0.631)S(0.631)PVPS(0.79)P<br>T(0.032)LDR                         | 1686.8424 |

|            |                                                                           |           |
|------------|---------------------------------------------------------------------------|-----------|
| A0A3B2WCL5 | TSS(1)LTHSEEK                                                             | 1117.5251 |
| A0A2R8W6N3 | T(0.047)S(0.047)S(0.903)NPGALS(0.002)HETGLSGLETA<br>TK                    | 2157.055  |
| A0A1L1SQP9 | TSS(1)PEESIR                                                              | 1004.4775 |
| Z4YKC4     | T(0.001)S(0.001)S(0.998)PTSLPPLAR                                         | 1225.6667 |
| E9PXE2     | T(0.002)S(0.002)S(0.995)T(0.002)GEEEESLAILR                               | 1620.7843 |
| A0A140T8I9 | TSSVSSISQVS(1)PER                                                         | 1462.7264 |
| A0A140LJ04 | TSSVVEEHFQGS(0.477)AS(0.477)PT(0.045)EAATPAAG<br>DR                       | 2601.1943 |
| E9Q852     | TSS(1)VVTLEVAK                                                            | 1132.634  |
| B7ZNF6     | T(0.077)S(0.077)T(0.641)APS(0.103)S(0.103)PGVDSVPLQ<br>R                  | 1697.8584 |
| A4FU75     | TSTPT(0.002)GHGAS(0.932)PT(0.066)KQDDLVISAR                               | 2238.124  |
| Q80T41     | TST(0.023)S(0.977)VTSVNQASTSR                                             | 1524.738  |
| Q80T41     | TST(0.949)S(0.051)VTSVNQASTSR                                             | 1524.738  |
| A2ALU3     | T(0.014)S(0.014)VS(0.193)S(0.779)PEHLVKPLR                                | 1548.8624 |
| P19246     | TSVS(0.001)S(0.006)VS(0.258)AS(0.644)PS(0.092)R                           | 1163.5782 |
| P09528     | T(0.001)T(0.028)AS(0.97)PS(0.001)QVR                                      | 945.48796 |
| A2AAE1     | TTFSENLS(1)PK                                                             | 1122.5557 |
| Q6XE40     | TTGTLPS(1)PQNFK                                                           | 1289.6616 |
| Q542T4     | TTHYGS(1)LPQK                                                             | 1130.572  |
| Q8R191     | T(0.5)T(0.5)PGPGTAQAGDAAR                                                 | 1369.6586 |
| Q5NCM6     | T(0.067)T(0.067)S(0.866)PDLFESQLTSASSKPSSAR                               | 2383.1503 |
| E9Q4X5     | TTS(0.002)S(0.001)ADPT(0.286)S(0.71)PDLGPR                                | 1500.7056 |
| A0A2R8W6N3 | T(0.038)T(0.038)T(0.924)PDVAHPK                                           | 1065.5455 |
| Q8K2R6     | T(0.237)T(0.237)Y(0.198)ANS(0.166)S(0.166)LIKY(0.996)<br>MEK              | 1647.8178 |
| Q8CGI9     | T(0.005)VGT(0.994)PIAS(0.001)VPGSTNTGTVPGSEK                              | 2156.0961 |
| Q3UGH4     | T(0.218)VPAT(0.74)PPRT(0.487)GS(0.487)PLT(0.059)VA<br>T(0.01)GNDQAATEAK   | 2650.3562 |
| Q8CCJ4     | TVPLVDS(0.004)EGGS(0.996)GR                                               | 1272.631  |
| A0A0R4J124 | TVSAS(0.1)S(0.678)T(0.222)GDLPK                                           | 1161.5877 |
| G5E884     | T(0.002)VS(0.003)ET(0.008)PAVPPVS(0.93)EDEDDEDD<br>AT(0.057)PPPVIAPRPEHTK | 3722.7435 |
| A0A0A6YVS6 | TVS(1)VPVEGR                                                              | 942.51345 |
| O08553     | TVT(1)PASSAK                                                              | 860.46035 |
| O08553     | TVTPAS(0.003)S(0.997)AKT(0.96)S(0.041)PAK                                 | 1344.7249 |
| Q5GH67     | TVVS(0.001)S(0.001)GS(0.001)AAGEGEVRPS(0.224)T(0.<br>772)PQR              | 2071.0294 |
| Q9WV34     | T(0.052)Y(0.006)ET(0.946)PPPS(0.99)PGLDPT(0.005)FS(0<br>.001)NQPVPDAVR    | 2778.3501 |
| Q3UGY8     | VAAPS(0.002)S(0.711)S(0.283)PS(0.003)AEAAYWR                              | 1706.79   |
| D3YYN7     | VAEIPFNS(0.892)T(0.108)NK                                                 | 1218.6245 |
| A2ARP8     | VAELEEEQS(0.993)QGS(0.455)S(0.491)S(0.059)YS(0.001<br>)DWVK               | 2257.0023 |
| A0A1B0GSR5 | VAENGLES(1)PEKEER                                                         | 1585.7584 |
| Q9D1T2     | VAEPEES(1)EAEEPAAEGR                                                      | 1798.7857 |

|            |                                                                     |           |
|------------|---------------------------------------------------------------------|-----------|
| G3UYQ3     | VAGGSGS(0.003)ES(0.997)PLLK                                         | 1200.635  |
| Q8BZW2     | VAGPDPS(0.966)PEDS(0.034)PNQR                                       | 1564.7118 |
| A0A668KLC6 | VAIIRT(1)PPK                                                        | 993.6335  |
| A2AJA9     | VALAAGS(0.985)PT(0.015)RPPPAR                                       | 1459.8259 |
| A0A087WSM1 | VALS(1)EEEEER                                                       | 1318.5889 |
| Q8R2R3     | VASAESCHSEQQEPS(0.957)PT(0.043)AER                                  | 2198.9498 |
| A2A7T3     | VAS(1)DTEDTDR                                                       | 1107.468  |
| Q3URF1     | VAS(1)EEEEVPLVVYLK                                                  | 1702.9029 |
| Q3URF1     | VASLS(1)PAR                                                         | 799.4552  |
| Q3UMB5     | VAS(1)PANVGTLHTLSR                                                  | 1521.8263 |
| Q68FH0     | VASPSQGQVGS(0.086)S(0.086)S(0.827)PK                                | 1414.7052 |
| H3BIW6     | VAS(1)VEEGDETLDSPGSQSR                                              | 1961.8814 |
| F7CYX4     | VAS(0.042)VS(0.958)LEGLNLR                                          | 1327.746  |
| A0A0A0MQC7 | VAVVRT(1)PPK                                                        | 965.6022  |
| Q8VDS4     | VDENENCS(0.521)S(0.402)LGS(0.073)PS(0.004)EPPQTL<br>DLVR            | 2642.213  |
| O88704     | VDGGGGEEPAGS(1)FEDAEGPR                                             | 1931.8133 |
| A0A668KLC6 | VDHGAEIITQS(0.99)PS(0.01)R                                          | 1508.7583 |
| Q3UNH4     | VDIVS(1)PGGDNAGSLR                                                  | 1455.7318 |
| D3YYN7     | VDNS(0.013)S(0.987)LTGESEPQTR                                       | 1618.7435 |
| Q6PD32     | VDNS(0.343)VEAEVNS(0.585)KS(0.59)S(0.483)LEDEEE<br>PIR              | 2574.1933 |
| E9PUE1     | VDS(1)EGER                                                          | 790.34571 |
| B2KGP3     | VDS(1)FTDR                                                          | 838.3821  |
| F6UYN4     | VDS(1)PTVTTTLK                                                      | 1160.6289 |
| P47856     | VDS(0.982)T(0.018)TCLFPVEEK                                         | 1523.7178 |
| Q99KI0     | VDVS(1)PTSQR                                                        | 987.49852 |
| A3KFN7     | VECGS(1)DPEENSAR                                                    | 1448.5838 |
| B7ZP47     | VEEEDTGDPPFGFDS(0.955)DDES(0.045)LPVSSK                             | 2600.0926 |
| A0A2U3TZ49 | VEEHS(1)PLER                                                        | 1094.5356 |
| F8VQN6     | VEHHDLSVAGLQS(1)PDR                                                 | 1758.8649 |
| A0A2R8VHZ9 | VELS(1)EEELK                                                        | 1074.5445 |
| B1ATA0     | VEPPHS(0.997)S(0.997)HEDLT(0.005)DDLSTR                             | 2033.929  |
| E9Q6P5     | VEQALSEVAS(0.163)S(0.788)LQS(0.022)S(0.027)APK                      | 1829.9371 |
| A0A2I3BRL8 | VEQAT(0.003)KPS(0.986)FES(0.011)GR                                  | 1434.7103 |
| F6TGJ2     | VES(1)EES(1)GDEEGKK                                                 | 1421.6158 |
| Q8BPC7     | VES(1)LEQEANER                                                      | 1373.6423 |
| Q3UXQ1     | VES(1)PPAAR                                                         | 825.43447 |
| Q6PD32     | VES(0.002)T(0.966)S(0.031)GSECENPTK                                 | 1523.641  |
| A0A5F8MPE1 | VESTSVGSIS(1)PGGAK                                                  | 1374.6991 |
| Q9JKR6     | VES(0.136)VFET(0.726)LVEDS(0.136)PEEES(0.001)T(0.0<br>01)LT(0.001)K | 2367.1217 |
| B7ZMR0     | VETAEVCS(0.017)RPQELPQS(0.983)PR                                    | 2082.0164 |
| A2A9Q0     | VFALNCS(1)WR                                                        | 1151.5546 |

|            |                                                                     |           |
|------------|---------------------------------------------------------------------|-----------|
| Q8BGC0     | VFEDNS(1)NEKLFDEEEGPNEK                                             | 2368.0343 |
| E9Q3M9     | VFS(1)QENVCDR                                                       | 1252.5506 |
| P05202     | VGAS(1)FLQR                                                         | 876.48175 |
| Q8BK06     | VGDEGNES(1)PAER                                                     | 1258.5426 |
| E9QK48     | VGGYAT(0.007)S(0.003)PS(0.216)S(0.775)PK                            | 1149.5666 |
| S4R1Y1     | VGLQS(1)PSVETR                                                      | 1171.6197 |
| Q8BTG3     | VGRPHS(0.955)S(0.045)PAR                                            | 1062.5683 |
| Q3UHQ0     | VGS(0.003)LT(0.997)PPS(0.901)S(0.099)PK                             | 1068.5815 |
| Q3UHQ0     | VGSLT(1)PPS(0.376)S(0.624)PK                                        | 1068.5815 |
| Q68FH0     | VGS(1)PLTLTDAQTR                                                    | 1357.7201 |
| Q6A018     | VGTEGLVDS(0.981)FS(0.019)QGLER                                      | 1692.8319 |
| S4R2F3     | VGT(1)PTDIHSEK                                                      | 1182.5881 |
| A8DUQ5     | VHLT(1)DAEK                                                         | 911.47125 |
| A0A286YDH6 | VILHPT(0.009)PNS(0.991)PK                                           | 1201.6819 |
| Q8C2N9     | VIS(0.956)DS(0.035)ES(0.012)DIGGS(0.997)DVEFKPDT<br>K               | 2224.0383 |
| Q4VA93     | VIS(1)PSEDR                                                         | 901.45051 |
| A8IP69     | VISSIEQKT(0.247)S(0.753)ADGNEK                                      | 1704.853  |
| A8DUQ5     | VITAFNDGLNHLDS(1)LK                                                 | 1755.9155 |
| Q6PDI4     | VKLDDDS(1)EEDEESR                                                   | 1664.7013 |
| Q8BKB2     | VLAPCS(0.95)PS(0.05)EER                                             | 1243.5867 |
| Q8BGC0     | VLDEEGS(1)ER                                                        | 1032.4724 |
| Q3UGY4     | VLDT(0.026)PLS(0.974)EGDEPTTLPAQR                                   | 2038.0219 |
| Q9ET80     | VLEKPPS(1)PK                                                        | 993.58588 |
| F6QYF8     | VLGATLS(1)PELIQK                                                    | 1367.8024 |
| Q8VDD9     | VLS(1)DS(1)EEEEKDADVPGTSTR                                          | 2162.9815 |
| Q91VB8     | VLS(1)GEDK                                                          | 746.38103 |
| B2RQQ5     | VLS(0.986)PLRS(0.987)PPLGGS(0.229)ES(0.789)PY(0.009<br>)EDFLSADSK   | 2803.428  |
| Q3TQY7     | VLS(1)PPHTK                                                         | 877.50215 |
| A0A5F8MPN1 | VLTAFLPDS(0.003)S(0.003)VS(0.129)GT(0.129)S(0.736)L                 | 1592.8298 |
| P26645     | VNGDAS(1)PAAAEPGAK                                                  | 1353.6525 |
| A0A3Q4EBK4 | VNHEPEPAS(0.001)GAS(0.948)PGAT(0.051)IPK                            | 1857.9221 |
| Q6ZQ92     | VNLKS(1)PS(0.925)S(0.075)EEIER                                      | 1486.7627 |
| A0A286YDE4 | VNS(1)PESER                                                         | 916.42502 |
| D6RII9     | VPAPPGS(1)PCR                                                       | 1036.5124 |
| Q99JJ9     | VPEPESQT(0.049)S(0.95)PK                                            | 1197.5877 |
| A0A0N4SUJ0 | VPLLFS(0.998)DEEDS(0.002)EVPSGVKPEDLK                               | 2528.2534 |
| B7ZNJ3     | VPLPGPGS(1)PEVK                                                     | 1175.655  |
| Q9CYG7     | VPS(1)AGDVER                                                        | 928.46141 |
| A2ARP8     | VPSAPGQES(1)PVPDTK                                                  | 1507.7518 |
| A2ARP8     | VPS(0.026)APGQES(0.972)PVPDT(0.019)KS(0.186)T(0.64<br>5)PPT(0.152)R | 2147.0859 |
| B2RTE3     | VPS(1)PDHR                                                          | 806.4035  |

|            |                                                                                       |           |
|------------|---------------------------------------------------------------------------------------|-----------|
| Q8BTI8     | VPS(1)PTPVPK                                                                          | 920.53312 |
| Q4W8U9     | VPSPVS(0.98)S(0.02)EDDLQEEEQLEQAIAK                                                   | 2469.1759 |
| P58871     | VPS(1)S(1)DEEVVEEPQSR                                                                 | 1685.7744 |
| B7ZMZZ     | VPVLIS(0.873)PT(0.127)LK                                                              | 1065.6798 |
| A2AWI7     | VPVTYLELLS(1)                                                                         | 1132.638  |
| A0A0R4J0B2 | VQDFMEKQEMWT(1)R                                                                      | 1726.7807 |
| A2ACC7     | VQHQAS(0.083)S(0.264)T(0.288)S(0.382)PLS(0.242)S(0.734)PNQT(0.004)S(0.001)S(0.001)EPR | 2324.0993 |
| A0A3B2WCD8 | VQIS(1)PDSGGLPER                                                                      | 1353.6888 |
| B2RQQ5     | VQSLEGEKLS(1)PK                                                                       | 1313.7191 |
| A0A0S3CWK3 | VQS(0.993)S(0.007)PNLLAAGR                                                            | 1211.6622 |
| Q3UHJ0     | VQT(0.5)T(0.5)PPPTIQGQK                                                               | 1393.7565 |
| Q3UHJ0     | VQT(0.007)T(0.993)PPPTIQGQK                                                           | 1393.7565 |
| A0A3B2WBH9 | VQVAPLQGS(1)PPLSHDDR                                                                  | 1814.9275 |
| A2ARP8     | VRT(0.012)ES(0.935)S(0.052)EALK                                                       | 1118.5932 |
| Q3U5E1     | VSALAGPS(0.5)S(0.5)DDENEEESKPEKEDEPQEDAK                                              | 3258.4172 |
| E9PV45     | VSDQNS(1)PVLPK                                                                        | 1182.6245 |
| Q8C1D8     | VS(0.406)DS(0.594)ESEDQPQGPAS(0.561)DS(0.435)EAE<br>DAS(0.004)R                       | 2492.0423 |
| Q6ZPZ4     | VSEEDQS(1)LENS(1)EADVК                                                                | 1777.7854 |
| Q60829     | VS(0.265)EHS(0.868)S(0.868)PEEEASPHQR                                                 | 1804.7976 |
| A0A5F8MPF3 | VS(1)ENEEEKPSDAPK                                                                     | 1557.7158 |
| P58871     | VSGAGLS(0.986)PS(0.014)R                                                              | 929.49304 |
| P08553     | VS(0.001)GS(0.994)PS(0.004)S(0.001)GFR                                                | 979.47231 |
| Q3UV34     | VS(1)PENLVDK                                                                          | 999.52368 |
| A0A0N4SUJ0 | VS(0.999)PEVGS(0.001)ADVASIAQK                                                        | 1556.8046 |
| F6TZK4     | VS(1)PPESPR                                                                           | 867.44503 |
| Q6NVE8     | VS(0.988)PS(0.012)PSQESLSSSK                                                          | 1418.6889 |
| Q80U72     | VS(1)PTGAAGR                                                                          | 814.42972 |
| E9PUI4     | VS(1)PVPSPSQPAR                                                                       | 1220.6513 |
| D3YTR0     | VS(0.165)S(0.835)PEDSPAGTPQR                                                          | 1426.6688 |
| Q71M36     | VS(0.001)S(0.999)PHAR                                                                 | 752.39294 |
| Q8BTI8     | VS(0.568)S(0.432)PVLETVQQR                                                            | 1341.7252 |
| Q8BPN8     | VS(1)VDS(1)NLFVYSK                                                                    | 1356.6925 |
| A2A8V9     | VS(1)VS(1)PGR                                                                         | 700.38679 |
| E9Q284     | VT(0.001)GS(0.999)PAEEDDEEETK                                                         | 1519.6526 |
| Q4KL52     | VTLQDYHLPDS(1)DEDEETAQR                                                               | 2473.1245 |
| Q9QYB8     | VTMILQS(0.975)PS(0.025)FR                                                             | 1277.6802 |
| Q9R0L6     | VTNAIS(1)PESSPGVGR                                                                    | 1469.7474 |
| Q05C56     | VTQILQS(1)PAFR                                                                        | 1258.7034 |
| S4R255     | VTQPLGT(0.978)PT(0.022)K                                                              | 1040.5866 |
| A0A6I8MWZ0 | VT(0.004)S(0.996)LEEELTDLR                                                            | 1403.7144 |
| E9Q827     | VTS(1)PEKAEEAK                                                                        | 1187.6034 |
| A0A087WRY3 | VVDYSQFQES(1)DDADEDYGR                                                                | 2236.9033 |

|            |                                                          |           |
|------------|----------------------------------------------------------|-----------|
| A2AAE1     | VVFENEQDNNS(0.967)LT(0.033)K                             | 1635.774  |
| Q9D927     | VVLASAS(1)PR                                             | 898.52362 |
| B9EIX2     | VVQT(0.005)S(0.958)PS(0.037)AR                           | 943.50869 |
| Q3UX08     | VVS(1)EEHLR                                              | 967.50869 |
| P63101     | VVS(0.112)S(0.888)IEQK                                   | 888.49165 |
| A0A2R8W6N3 | VVS(0.999)S(0.001)T(0.001)S(0.999)EEEEAFTEK              | 1670.7523 |
| Q569Z6     | WAHDKFS(1)GEEGEIEDDES(1)GTENR                            | 2636.0899 |
| Q569Z6     | WAHDKFSGEEGEIEDDES(1)GTENR                               | 2636.0899 |
| Q768S5     | WHQLQENHVS(0.846)S(0.154)D                               | 1592.6968 |
| A2ARP8     | WLAES(1)PVGLPPEEEDKLTR                                   | 2165.1004 |
| A2ARP8     | WLAES(0.999)PVGLPPEEEDKLT(0.001)R                        | 2165.1004 |
| Q8K2C9     | WLDES(1)DAEMELR                                          | 1492.6504 |
| A2A8V9     | WQS(0.999)PVT(0.001)K                                    | 844.4443  |
| A2A8V9     | WQS(0.896)PVT(0.104)K                                    | 844.4443  |
| B7NZ86     | WSDQLS(1)LDEK                                            | 1219.5721 |
| Q3UZP2     | WTEGGGHS(1)R                                             | 985.43659 |
| A2AQJ6     | WVEENVPSVTDVALPALLDS(0.999)DEER                          | 2769.3345 |
| Q3UGH4     | WVHFS(0.999)DAS(0.999)PEHVT(0.001)PELTPR                 | 2204.0651 |
| Q91X45     | Y(0.398)CLRS(0.535)Y(0.398)T(0.669)QS(0.451)GDLY(0.549)R | 1780.8203 |
| Q3U931     | Y(0.001)EDEVFGDS(0.066)EPELDEES(0.933)EDEVEEE<br>QEDR    | 3375.307  |
| Q3TD41     | Y(0.998)MKS(0.154)QT(0.848)ILR                           | 1138.6169 |
| Q3TD41     | Y(0.999)MKS(0.5)QT(0.5)ILR                               | 1138.6169 |
| Q8BHS6     | Y(0.009)NDWS(0.989)DDDDDS(0.002)NESK                     | 1803.6344 |
| A0A0H2UH20 | YNLDAS(1)EEEDSNK                                         | 1512.6216 |
| Q3UGH4     | Y(0.009)NS(0.991)PELDEEGYSIRPEEPGSK                      | 2496.1292 |
| Q80U73     | YPSSIS(0.038)S(0.076)S(0.886)PQK                         | 1179.5772 |
| Q3UR88     | Y(0.008)QDEVFGGFVT(0.253)EPQEES(0.739)EEVEEPEE<br>EER    | 3215.3579 |
| A0A338P6P6 | YSALLS(0.991)PS(0.009)EQEK                               | 1350.6667 |
| P09411     | Y(0.391)S(0.609)LEPVAAELK                                | 1218.6496 |
| Q3UR37     | Y(0.184)S(0.807)PS(0.014)QNS(0.994)PIHHIPSR              | 1718.8489 |
| F6SFF5     | Y(0.104)T(0.119)DQS(0.769)GEEEDY(0.008)ESEEQLQ<br>HR     | 2600.0423 |

**Table S7.** Detailed information of phosphorylation sites identified in tau protein from the tryptic digest of mice brain lysate.

| No. | Phospho (STY) Probability                                 | Phospho Site        |
|-----|-----------------------------------------------------------|---------------------|
| 1   | IGS(0.987)T(0.013)ENLK                                    | S262                |
| 2   | VAVVRT(1)PPK                                              | T231                |
| 3   | S(1)PVVS(0.999)GDT(0.001)SPR                              | Y394, S396          |
| 4   | SPVVSGDT(0.002)S(0.998)PR                                 | S404                |
| 5   | SPVVS(1)GDT(0.261)S(0.739)PR                              | S400, S404          |
| 6   | S(1)PVVS(1)GDT(0.813)S(0.187)PR                           | S396,<br>S400, T403 |
| 7   | SGYS(0.003)S(0.996)PGS(0.001)PGTPGSR                      | S199                |
| 8   | S(0.106)GY(0.151)S(0.881)S(0.863)PGS(0.994)PGT(0.004)PGSR | S198,<br>S199, S202 |
| 9   | S(0.001)GYS(0.635)S(0.364)PGS(0.999)PGT(0.001)PGSR        | S202                |
| 10  | AEEAGIGDT(1)PNQEDQAAGHVTQAR                               | T111                |
| 11  | T(0.001)PS(0.999)LPTPPTR                                  | S214                |
| 12  | T(0.217)PS(0.783)LPT(1)PPTR                               | S214, T217          |
| 13  | IPAKT(0.157)T(0.849)PS(0.993)PK                           | T175                |

**Table S8.** The phosphopeptides obtained from the tryptic digest of human cerebrospinal fluid enriched by G@mSiO<sub>2</sub>@PEI-PFIL-Ti<sup>4+</sup> nanocomposites.

| Protein IDs | Phospho (STY) Probabilities                                | Mass      |
|-------------|------------------------------------------------------------|-----------|
| A0A024R6M5  | EKT(0.705)GFS(0.252)VS(0.228)S(0.485)KDS(0.33)K            | 1398.6991 |
| A0A0A0MSD7  | AALGES(1)GEQADGPK                                          | 1328.6208 |
| A0A0D9SF30  | SPAEEAAT(0.139)ALAS(0.861)PK                               | 1212.635  |
| A0A2I2MP51  | ES(0.6)S(0.4)QEQQSSVVR                                     | 1234.579  |
| A0A2U8KGL5  | ATEDEGS(1)EQKIPEATNR                                       | 1873.8654 |
| A0A2U8KGL5  | ATEDEGS(1)EQKIPEATNRR                                      | 2029.9665 |
| A0A669KBG0  | HLAQAS(1)QELQ                                              | 1123.5622 |
| A0A669KBG0  | SRHLAQAS(1)QELQ                                            | 1366.6953 |
| A0A7P0T8N8  | KLIQES(1)DQHLK                                             | 1337.7303 |
| P68871      | VHLT(1)PEEK                                                | 951.50255 |
| A8K8G0      | AGDLLEDS(1)PKRPK                                           | 1424.7623 |
| B3KNK9      | KGNEAVAS(1)R                                               | 930.48829 |
| B3KRX4      | AVDAPPS(0.6)S(0.6)VT(0.6)S(0.6)T(0.6)PR                    | 1383.6994 |
| B4DEA7      | GEQGEDS(0.923)S(0.077)EEK                                  | 2802.0748 |
| B4DEA7      | EKS(0.382)S(0.873)QES(0.873)GEEAGS(0.873)QENHPQES<br>KGQPR | 2839.2605 |
| B4DEA7      | EKSSQESGEEAGS(1)QENHPQESKGQPR                              | 2839.2605 |
| B4DEA7      | EKS(0.382)S(0.873)QES(0.873)GEEAGS(0.873)QENHPQES<br>KGQPR | 2839.2605 |
| B4DEA7      | GEQGEDS(0.923)S(0.077)EEK                                  | 1193.4684 |
| B4DEA7      | SSQES(1)GEEAGSQENHPQESKGQPR                                | 2582.1229 |
| B4DMA2      | IEDVGS(1)DEEDDSGKDKK                                       | 1864.8174 |
| B4DQJ6      | IESQT(1)QEEVR                                              | 1217.5888 |
| B4DQJ6      | IESQTQEEVRDS(1)KENIEK                                      | 2161.0499 |
| B7Z556      | CDS(1)SPDSAEDVR                                            | 1336.5201 |
| B7Z556      | CDSSPDS(1)AEDVRK                                           | 1464.6151 |
| C9JNC3      | T(1)EEQMEEY(1)RGR                                          | 1426.6147 |
| C9JXF9      | AQET(0.095)S(0.905)GEEISK                                  | 1177.5463 |
| F5GZ08      | GSTEQDAAS(1)PEKEK                                          | 1475.674  |
| F6KPG5      | TCVADES(1)AENCDK                                           | 1497.5712 |
| G5E968      | S(1)GELEQEEER                                              | 1204.5208 |
| H7C2K7      | TEADED RGQGDS(0.327)S(0.673)EEAPKQDR                       | 2318.9847 |
| I3L0V6      | VDPVDTPES(0.002)S(0.113)MLRHT(0.885)AAR                    | 1980.9687 |
| O15240      | S(1)QEETPGHR                                               | 1039.4683 |
| O15354      | GAGISGRS(0.989)QEQS(0.011)VK                               | 1402.7165 |
| P05060      | WAEGGHS(1)R                                                | 1499.6753 |
| P05060      | SETHAAGHS(1)QEK                                            | 1280.5745 |
| P05060      | SETHAAGHSQEKT(0.006)HS(0.994)R                             | 1761.8143 |
| P05060      | SETHAAGHS(0.01)QEKT(0.632)HS(0.359)REK                     | 2018.9518 |
| P05060      | WAEGGHS(1)R                                                | 955.42603 |



|        |                                                         |           |
|--------|---------------------------------------------------------|-----------|
| P05060 | S(0.113)QEES(0.886)EEGEEDAT(0.001)SEVDKRR               | 2308.9891 |
| P05060 | MAHGYGEES(1)EEER                                        | 1522.5994 |
| P24593 | EQVKIERDS(1)R                                           | 1258.663  |
| P69905 | VLS(1)PADKTNVK                                          | 1170.6608 |
| P80723 | AEGAATEEEGT(1)PK                                        | 1288.5783 |
| Q05CF8 | EET(0.032)T(0.003)S(0.012)HLRS(0.925)CEY(0.027)K        | 1638.7308 |
| Q13784 | ISAS(1)AEELR                                            | 974.50327 |
| Q14515 | HIQETEQS(1)QEGK                                         | 1598.7325 |
| Q14515 | TELPREHANS(1)K                                          | 1280.6473 |
| Q14515 | AEAEENEKETAVS(1)TEDDSHHKAEK                             | 2683.1845 |
| Q14515 | ETAVS(0.5)T(0.5)EDDSHHK                                 | 1454.6274 |
| Q14515 | EES(1)HEQS(1)AEQGK                                      | 1357.5746 |
| Q14515 | S(1)KEES(1)HEQSAEQGK                                    | 1572.7016 |
| Q14515 | SS(0.008)S(0.992)QELGLK                                 | 947.49238 |
| Q3LGB0 | S(1)KEEDKHLK                                            | 1112.5826 |
| Q3LGB0 | ISHELDS(0.993)AS(0.006)S(0.001)EVN                      | 1386.6263 |
| Q3LGB0 | ISHELDS(0.038)AS(0.298)S(0.665)EVN                      | 1386.6263 |
| Q3LGB0 | ISHELDS(0.006)AS(0.994)SEVN                             | 1386.6263 |
| Q3LGB0 | KANDES(1)NEHSDVIDSQELSK                                 | 2586.2158 |
| Q3LGB0 | KANDESNEHSDVIDSQELS(0.01)KVS(0.99)R                     | 2586.2158 |
| Q53F35 | RET(1)DDEGEDD                                           | 1307.5113 |
| Q59G34 | ADES(1)QEPQSQVR                                         | 1372.6219 |
| Q5JTM7 | S(0.03)NS(0.189)AEPNS(0.781)AEQDEAEPR                   | 1829.7664 |
| Q6FHJ5 | KLS(1)PTEPK                                             | 898.51238 |
| Q86U12 | DKEVS(1)DDEAEKEDK                                       | 1764.7537 |
| Q8IVG5 | LNS(0.439)KS(0.562)PES(0.992)DNHDPGQLDNS(0.008)K        | 2180.9934 |
| Q8N4S1 | AEDEENEKET(0.032)AVS(0.513)T(0.435)EDDS(0.02)HHK<br>AEK | 2727.1744 |
| Q969E1 | RCS(0.993)LS(0.007)VAQE                                 | 1048.4971 |
| Q96AF9 | GPPAS(0.639)S(0.361)PAPAPK                              | 1075.5662 |
| Q96AF9 | GPPAS(0.259)S(0.741)PAPAPK                              | 1075.5662 |
| Q9H7J1 | S(1)RERPPGT(1)DIPR                                      | 1379.727  |

**Table S9.** The phosphopeptides obtained from the tryptic digest of human blood enriched by G@mSiO<sub>2</sub>@PEI-PFIL-Ti<sup>4+</sup> nanocomposites.

| Protein IDs | Phospho (STY) Probabilities                   | Mass      |
|-------------|-----------------------------------------------|-----------|
| A0A024QYV2  | S(0.531)DDS(0.469)NGIENNVPR                   | 1415.6277 |
| A0A024QYV2  | SDDS(1)NGIENNVPR                              | 1415.6277 |
| A0A024QZ54  | EEDGADAS(1)EEDLTR                             | 1535.6223 |
| A0A024QZ70  | ASDPQS(1)PPQVSR                               | 1267.6157 |
| A0A024QZ77  | ADLNQGIGEPQS(1)PSR                            | 1567.759  |
| A0A024QZ77  | RADLNQGIGEPQS(0.907)PS(0.093)RR               | 1879.9613 |
| A0A024R028  | LTS(1)AEVPMATDR                               | 1289.6286 |
| A0A024R028  | S(0.003)QS(0.997)FAGFSGLQER                   | 1412.6684 |
| A0A024R0X0  | SLS(1)LGDKEISR                                | 1203.6459 |
| A0A024R0X0  | TADS(1)VSPLEPPTKDK                            | 1583.8043 |
| A0A024R166  | AVS(1)EGCAS(1)EDEVEGEA                        | 1637.6363 |
| A0A024R555  | VPAS(1)PLPLGLER                               | 1134.6397 |
| A0A024R5S7  | GT(0.009)S(0.991)T(1)ELVKENQKLLK              | 1573.8675 |
| A0A024R603  | NCES(1)DTEEDIAR                               | 1437.5678 |
| A0A024R629  | QGS(1)LAMEELK                                 | 1104.5485 |
| A0A024R629  | SGS(0.002)GPS(0.998)LK                        | 731.38137 |
| A0A024R7N1  | S(0.012)QGS(0.986)PEDS(0.002)APQASPGPSK       | 1725.7806 |
| A0A024R7N1  | S(1)LDSPTSSPGAGTR                             | 1331.6317 |
| A0A024R7N1  | SLDS(1)PTS(0.263)S(0.737)PGAGTR               | 1331.6317 |
| A0A024R8A9  | S(0.111)S(0.356)S(0.528)PCRT(0.004)PEPDNDAHLR | 1937.865  |
| A0A024RBK4  | ALPSLNTGS(0.008)S(0.126)S(0.866)PR            | 1285.6626 |
| A0A024RBK4  | LDSQPQET(0.596)S(0.404)PELPRR                 | 1751.8802 |
| A0A024RCL9  | ADY(1)ACIAENKPT                               | 1351.6078 |
| A0A024RCU1  | AS(0.001)S(0.999)LEDLVLK                      | 1073.5968 |
| A0A024RD07  | LLDY(0.002)S(0.998)LHKER                      | 1272.6826 |
| A0A024RD92  | RPPS(1)PPGPEER                                | 1217.6153 |
| A0A024RDV7  | RNVPQEESEDS(1)DVDADFK                         | 2191.9869 |
| A0A075BPH5  | AETSEGSAPSAPVPEAS(0.02)AS(0.98)PK             | 1928.8963 |
| A0A087WTC9  | T(0.177)PRIS(0.823)PPIKEEETK                  | 1623.8832 |
| A0A087WTQ7  | S(0.122)RS(0.878)PLELEPEAK                    | 1354.7092 |
| A0A087WZ99  | ARGDS(1)EALDEES                               | 1277.5372 |
| A0A087WZ99  | EGPDLDRPGS(1)DR                               | 1312.6008 |
| A0A087WZ99  | EGPDLDRPGS(1)DRQER                            | 1725.803  |
| A0A087X183  | S(0.242)PS(0.758)PAHLPDDPKVAEK                | 1686.8577 |
| A0A087X1N4  | VPPS(1)PDDLPSR                                | 1178.5932 |
| A0A090N8Y7  | VDS(1)EPS(1)GT(1)S(1)VLIK                     | 1330.698  |
| A0A096LNQ0  | RRS(1)HS(1)PS(1)PR                            | 1078.5744 |
| A0A0A0MQV9  | AS(0.001)LT(0.182)PVKS(0.818)GEHK             | 1252.6776 |
| A0A0A0MRJ9  | GS(1)GS(1)LEGEAAGCGR                          | 1306.5572 |

|            |                                                 |           |
|------------|-------------------------------------------------|-----------|
| A0A0A0MRN0 | REHS(0.979)PS(0.021)KEK                         | 1096.5625 |
| A0A0A0MRN0 | RRS(0.955)QS(0.901)IEQES(0.144)QEK              | 1603.7914 |
| A0A0A0MRN0 | S(1)RS(1)IDRGLER                                | 1187.6371 |
| A0A0A0MT65 | S(1)RPT(0.082)S(0.918)FADELAAR                  | 1419.7106 |
| A0A0C4DGA7 | RFS(0.746)S(0.254)GGEEDDFDR                     | 1515.6226 |
| A0A0D9SFT8 | S(0.032)S(0.032)RPAS(0.658)AS(0.276)S(0.001)STK | 1164.5735 |
| A0A0J9YVR0 | RPLS(0.726)S(0.135)S(0.135)HEAS(0.003)EGQAK     | 1582.7699 |
| A0A0S2Z4W1 | KET(1)ES(1)EAEDNLDDLEK                          | 1863.8222 |
| A0A0S2Z4W1 | S(0.003)RVS(0.995)VS(0.93)PGRT(0.038)S(0.034)GK | 1316.7161 |
| A0A0S2Z4W1 | APQTSS(0.071)S(0.929)PPPVR                      | 1378.7317 |
| A0A0S2Z4W1 | EARS(1)PQPNK                                    | 1025.5254 |
| A0A0S2Z4W1 | KS(0.013)RVS(0.988)VS(0.999)PGR                 | 1071.6149 |
| A0A0S2Z4W1 | KVELS(0.763)ES(0.237)EEDKGGK                    | 1533.7522 |
| A0A0S2Z4W1 | QRS(0.444)S(0.556)PVTK                          | 901.49813 |
| A0A0S2Z4W1 | RHS(1)PS(1)PRPR                                 | 1088.5952 |
| A0A0S2Z4W1 | RLS(0.946)PS(0.073)AS(0.981)PPR                 | 1066.5883 |
| A0A0S2Z4W1 | RRT(1)PS(1)PPPR                                 | 1062.6047 |
| A0A0S2Z4W1 | RRT(1)PT(1)PPPR                                 | 1076.6203 |
| A0A0S2Z4W1 | RS(1)PS(0.998)PPPT(0.002)RR                     | 1149.6367 |
| A0A0S2Z4W1 | RYS(1)PPIQR                                     | 1015.5563 |
| A0A0S2Z4W1 | S(0.75)PS(0.25)PAPPPR                           | 904.47667 |
| A0A0S2Z4W1 | T(1)AS(1)PPPPPK                                 | 890.48617 |
| A0A0S2Z4W1 | T(1)AS(1)PPPPPKR                                | 1046.5873 |
| A0A0S2Z4W1 | EKT(1)PELPEPSVK                                 | 1352.7187 |
| A0A0S2Z4W1 | EPS(1)PEKNSK                                    | 1014.4982 |
| A0A0S2Z4X1 | LAS(0.009)DDRPS(0.991)PPR                       | 1209.6102 |
| A0A140F1N4 | S(0.002)ES(0.997)PPPLSDPK                       | 1152.5663 |
| A0A140GX60 | LS(0.999)LT(0.001)DPLVAER                       | 1212.6714 |
| A0A140VJZ1 | SAADS(1)ISESVPVGPK                              | 1442.7253 |
| A0A140VK53 | RS(0.985)LS(0.305)GS(0.548)S(0.162)PCPK         | 1174.5765 |
| A0A140VK53 | S(1)CFES(0.231)S(0.769)PDPELK                   | 1394.6024 |
| A0A140VK53 | SCFES(0.039)S(0.961)PDPELK                      | 1394.6024 |
| A0A140VK53 | SATRPS(1)PS(1)PER                               | 1183.5945 |
| A0A140VK53 | QSHS(0.923)ES(0.076)PS(0.001)LQSK               | 1313.6212 |
| A0A140VK53 | RGS(0.649)RS(0.795)S(0.555)PEPK                 | 1099.5734 |
| A0A140VK53 | RVPS(0.982)PT(0.018)PAPK                        | 1048.6029 |
| A0A140VK53 | S(1)RT(1)PLLPR                                  | 938.56615 |
| A0A140VK53 | S(1)RT(1)PPAIR                                  | 896.5192  |
| A0A140VK53 | S(1)RT(1)PPVTR                                  | 912.51411 |
| A0A140VK53 | SSGHS(0.001)S(0.002)S(0.008)ELS(0.989)PDAVEK    | 1615.7326 |
| A0A140VK53 | T(0.94)KS(0.382)RT(0.678)PPR                    | 941.54066 |
| A0A140VK53 | S(0.5)RT(0.5)PPSAPSQR                           | 1269.6426 |
| A0A193AUV8 | RPS(1)ALSQGR                                    | 970.53083 |

|            |                                                      |           |
|------------|------------------------------------------------------|-----------|
| A0A1B0GW05 | APLS(1)PGRK                                          | 824.48684 |
| A0A1I9RI50 | MLMVT(0.977)LS(0.023)PTK                             | 1119.6032 |
| A0A1V1G0D9 | S(0.002)T(0.002)S(0.995)LNERPK                       | 1030.5407 |
| A0A1W2PQQ1 | RLEFILMPT(1)KR                                       | 1402.8119 |
| A0A1W2PQQ1 | VTS(1)TPQADSER                                       | 1189.5575 |
| A0A1W2PQQ1 | VT(0.003)S(0.971)T(0.026)PQADSEREASPLGSSVEPGTE<br>EK | 2787.3046 |
| A0A1X7SBS1 | S(0.001)SS(0.999)PVNVK                               | 816.43413 |
| A0A1X7SBS1 | S(0.013)S(0.1)S(0.887)PVNVKK                         | 944.5291  |
| A0A220K8H0 | LDLIS(1)KGEEPR                                       | 1255.6772 |
| A0A2Q2T6B6 | AS(1)PAPDDTDDTPQELKK                                 | 1826.8534 |
| A0A2Q2T6B6 | KSPS(0.5)SPS(0.5)VENSI                               | 1230.6092 |
| A0A2R8Y4N6 | S(1)LDGAAAVDSADR                                     | 1246.579  |
| A0A2R8Y695 | SLGGQQGS(1)PK                                        | 957.48796 |
| A0A2R8Y7C9 | GAFFMEFVRS(1)PR                                      | 1442.7129 |
| A0A2R8YDC1 | KDNEES(0.001)EQPPVPGT(0.699)PT(0.301)LR              | 1992.9752 |
| A0A2U3TZI1 | RGS(1)LLELGQGLQR                                     | 1425.8052 |
| A0A2X0SFD3 | VEQEEPIS(0.999)PGSTLPEVK                             | 1837.9309 |
| A0A2X0SFD3 | S(0.008)S(0.008)S(0.816)S(0.168)VGGLSVSSR            | 1208.5997 |
| A0A2Z5DI31 | KCS(1)QTQCPR                                         | 1163.5176 |
| A0A2Z5DI31 | S(0.5)S(0.5)PEQPRPSTSK                               | 1299.6419 |
| A0A2Z5DI31 | S(0.412)S(0.588)PEQPRPS(0.862)T(0.128)S(0.01)K       | 1299.6419 |
| A0A3B3IRV6 | ERDLS(1)RDR                                          | 1045.5265 |
| A0A3B3IRV6 | GRS(1)IDQDYER                                        | 1237.5687 |
| A0A3B3IRV6 | SFS(1)PEERR                                          | 1006.4832 |
| A0A3B3ISK1 | DADS(1)QNPDAPEGK                                     | 1342.5637 |
| A0A3B3ISP1 | SES(1)LSNCSIGKK                                      | 1308.6344 |
| A0A3B3ITZ9 | GSFS(0.999)DT(0.001)GLGDGK                           | 1139.5095 |
| A0A3B3ITZ9 | IDIS(1)PSTFR                                         | 1034.5397 |
| A0A3B3ITZ9 | NKKS(1)PEIHR                                         | 1107.6149 |
| A0A3B3ITZ9 | SSS(1)PPPRK                                          | 854.46102 |
| A0A3B3ITZ9 | ASAVSELS(1)PR                                        | 1015.5298 |
| A0A3B3IU28 | ERTESEVPPRPAS(1)PK                                   | 1678.8638 |
| A0A494C130 | S(1)DNDDIEVESDADKR                                   | 1706.7231 |
| A0A494C1Q3 | AT(1)NLEDMLKEEEK                                     | 1548.7341 |
| A0A494C1S7 | GKLS(1)AEENPDDSEVPSSSGINSTK                          | 2447.13   |
| A0A5E8     | ARS(1)PAAPR                                          | 824.46168 |
| A0A5J6KJ24 | T(0.999)PLGDT(0.372)T(0.848)HT(0.781)CPR             | 1354.6299 |
| A0A669KAX1 | SES(0.002)S(0.588)S(0.397)KS(0.011)S(0.001)QPLASK    | 1421.6998 |
| A0A7I2V4F2 | ADRDQS(0.996)PFS(0.004)K                             | 1149.5415 |
| A0A7I2V4F2 | KS(1)PPKADEK                                         | 998.53966 |
| A0A7I2V4F2 | NVS(1)ES(1)PNRK                                      | 1029.5203 |
| A0A7P0TAI0 | VTAEDKGT(1)GNKNK                                     | 1360.6947 |

|            |                                                    |           |
|------------|----------------------------------------------------|-----------|
| A0A7P0TAL9 | SPEKNERHT(1)C                                      | 1256.5568 |
| A0A7P0Z484 | AEDEILNRS(1)PR                                     | 1427.7005 |
| A0A7P0Z484 | QKS(0.674)DAEEDGGT(0.319)VS(0.007)QEEEDR           | 2107.8778 |
| A0JLU4     | NEGS(0.004)ES(0.996)APEGQAQQR                      | 1586.6921 |
| P68871     | VHLT(1)PEEK                                        | 951.50255 |
| A2A2D0     | ASGQAFELILS(1)PR                                   | 1387.746  |
| A2VCK8     | S(1)DKPDMAEIEK                                     | 1261.586  |
| A2VCK8     | S(1)DKPDMAEIEKFDK                                  | 1651.7763 |
| A2VCK8     | ETIEQEKQAGES(1)                                    | 1347.6154 |
| A2VCK8     | NPLPS(1)KETIEQEKQAGES                              | 1983.9749 |
| A2VDH9     | S(0.004)LS(0.996)VPDSGR                            | 916.46141 |
| A4D1V5     | REGS(0.981)LS(0.01)PVNS(0.01)QK                    | 1300.6735 |
| A6NKB8     | ASGEHS(0.999)PGS(0.001)GAAR                        | 1182.5378 |
| A6PVJ7     | KEEMALS(1)LTR                                      | 1176.6173 |
| A8K0J3     | NGPLNES(0.983)QEDEEDS(0.017)EHGTSLNR               | 2456.0324 |
| A8K201     | DDFMMGAS(1)MK                                      | 1131.4399 |
| A8K2L4     | AEAS(0.079)S(0.921)DPGAEER                         | 1217.516  |
| A8K2L4     | LIDRT(0.034)ES(0.966)LNR                           | 1215.6571 |
| A8K2L4     | LIDRT(0.617)ES(0.383)LNR                           | 1215.6571 |
| A8K2L4     | TPSPLVLEGTIEQS(0.61)S(0.385)PPLS(0.004)PT(0.001)TK | 2378.2581 |
| A8K2L4     | S(1)PEGEQEDRPGLHAYEK                               | 1940.8864 |
| A8K4F0     | S(0.083)T(0.083)S(0.832)VELT(0.001)GDPNKTR         | 1503.7529 |
| A8K6R3     | SLS(1)ASPALGSTK                                    | 1117.5979 |
| A8K6R3     | S(0.003)LS(0.997)AS(1)PALGSTK                      | 1117.5979 |
| A8K6R3     | S(0.005)RS(0.991)LS(0.003)AS(0.001)PALGSTK         | 1360.731  |
| A8K709     | SSS(0.944)S(0.055)S(0.001)EDVASSNQK                | 1411.6063 |
| A8K874     | VMKAS(0.996)VDDDDS(0.001)GWELS(0.003)MPEK          | 2237.982  |
| A8K8G0     | EDAEAPGIRDHES(1)L                                  | 1537.7009 |
| A8K8G0     | AGDLLEDS(1)PK                                      | 1043.5135 |
| A8K8G0     | AGDLLEDS(1)PKRPK                                   | 1424.7623 |
| A8K8G0     | GNAEGS(1)S(1)DEEGKLVIDEPAKEK                       | 2301.0972 |
| A8K8G0     | RRAGDLLEDS(1)PK                                    | 1355.7157 |
| A8KAL3     | ACS(0.5)T(0.5)PHVQVAGK                             | 1253.6187 |
| A8KAL3     | LDS(1)LGKEK                                        | 888.49165 |
| A8KAQ3     | S(0.002)GYHDDS(0.998)DEDLLE                        | 1493.5794 |
| A8MVU1     | PGPQS(1)PGS(1)PLEEER                               | 1478.7001 |
| A8MY87     | RT(0.255)ES(0.733)VPS(0.012)DINNPVDR               | 1697.8333 |
| B0QY04     | SVS(1)PQGNSVDR                                     | 1144.5473 |
| B1AKB5     | RS(0.13)S(0.522)FS(0.348)MEEGDVL                   | 1355.6027 |
| B1AKL5     | S(0.011)GS(0.989)PLEKDSGLR                         | 1359.663  |
| B1ALB7     | APGRPQLS(1)PGQK                                    | 1234.6782 |
| B2R548     | FGS(1)NINLEADES                                    | 1294.5677 |

|        |                                                             |           |
|--------|-------------------------------------------------------------|-----------|
| B2R7R4 | CQESLGRSL(1)PK                                              | 1273.6449 |
| B2RBA0 | LVEQANS(1)PK                                                | 984.52401 |
| B2RBY7 | SKPS(0.002)S(0.995)PVVS(0.003)EK                            | 1143.6136 |
| B2RBY7 | S(0.435)S(0.574)S(0.991)FKDFAK                              | 1015.4975 |
| B2RDG4 | VLLY(0.01)LLS(0.99)PR                                       | 1072.6645 |
| B2REB7 | RQS(1)PLPPQK                                                | 1049.5982 |
| B2RTU8 | EGPEVQEPEKRPLT(0.858)PS(0.164)LS(0.979)Q                    | 2120.075  |
| B2RTU8 | EGPEVQEPEKRPLT(0.951)PS(0.044)LS(0.006)Q                    | 2120.075  |
| B3KMN2 | RPKS(1)ESQGNATK                                             | 1301.6688 |
| B3KMS9 | S(1)VDIHDSIQPR                                              | 1265.6364 |
| B3KN67 | GETEERKDS(1)DDEK                                            | 1536.654  |
| B3KRW2 | DS(0.002)S(0.998)PS(0.02)S(0.517)S(0.825)PS(0.638)PK        | 1074.4829 |
| B3KRW2 | DSSPSS(0.001)S(0.018)PS(0.981)PK                            | 1074.4829 |
| B3KRW2 | SEKDTAAVVS(1)R                                              | 1161.599  |
| B3KRW2 | SEPRPPIS(0.5)S(0.5)PR                                       | 1221.6466 |
| B3KSJ3 | LDKENLS(1)DER                                               | 1217.5888 |
| B3KTG4 | KS(0.142)S(0.858)PQKEVK                                     | 1029.5819 |
| B3KTQ6 | S(0.012)T(0.012)S(0.977)FGVPNANSIK                          | 1320.6674 |
| B3KU03 | RPEAS(1)PVQK                                                | 1010.5509 |
| B3KU16 | DYDDMS(1)PR                                                 | 997.38111 |
| B3KU80 | S(0.372)PT(0.628)S(0.001)S(0.999)PTPQR                      | 1056.52   |
| B3KUY5 | ATAAT(0.165)S(0.835)PALK                                    | 929.5182  |
| B3KVN0 | QGGAS(0.815)QS(0.082)DKT(0.102)PEELFHPLGADSQV               | 2497.1721 |
| B3KVS4 | RRDS(1)DGVDGFEAEGK                                          | 1636.7441 |
| B3KVY2 | S(1)RS(1)PPVSK                                              | 953.52943 |
| B3KX39 | LDQVVES(1)PAIPR                                             | 1322.7194 |
| B3KX39 | LS(0.173)T(0.827)PPPLAEEGLASR                               | 1665.8574 |
| B3KX39 | RDS(1)RDVDEEK                                               | 1247.5742 |
| B3KX39 | IT(0.001)HS(0.998)PT(0.001)VSQVTER                          | 1453.7525 |
| B3KXZ8 | LLPEPGPS(0.208)DS(0.792)PGPK                                | 1389.714  |
| B3KY29 | AGPVS(1)PGCVK                                               | 970.4906  |
| B3KY56 | TLS(1)PEFNER                                                | 1091.5247 |
| B4DDX2 | S(0.04)GS(0.96)MDPSGAHPSVR                                  | 1383.6201 |
| B4DEJ6 | RS(0.109)S(0.891)PAQTR                                      | 901.47298 |
| B4DF22 | RS(0.999)PS(0.969)PS(0.032)PTPEAK                           | 1252.6412 |
| B4DF22 | S(0.996)PS(0.979)PS(0.025)PTPEAK                            | 1096.5401 |
| B4DF22 | TLTDEVNS(1)PDSRR                                            | 1603.7438 |
| B4DF77 | T(0.017)NS(0.804)S(0.167)DS(0.006)ERS(0.006)PDLGHS<br>TQIPR | 2183.0203 |
| B4DGM5 | EAEDS(1)DS(1)DDNIKR                                         | 1492.6278 |
| B4DJ25 | AQLS(1)PGIYDDTSAR                                           | 1492.7158 |
| B4DJP0 | KET(1)PPPLVPPAAR                                            | 1371.7874 |
| B4DKZ9 | IY(1)GISFPDPK                                               | 1135.5914 |

|        |                                                              |           |
|--------|--------------------------------------------------------------|-----------|
| B4DLW4 | S(1)PVLEEAPFSR                                               | 1230.6245 |
| B4DLW4 | T(0.004)GS(0.978)S(0.019)GALGPPER                            | 1127.5571 |
| B4DLW4 | TGSSGALGPPER                                                 | 1283.6582 |
| B4DM28 | GDDDEES(1)DEEAVKK                                            | 1564.6377 |
| B4DM68 | S(0.206)PS(0.344)T(0.449)IS(0.297)LKES(0.704)K               | 1175.6398 |
| B4DMA2 | EKEIS(1)DDEAEEEEK                                            | 1549.6631 |
| B4DMA2 | EKEIS(1)DDEAEEEEKGEK                                         | 1863.8222 |
| B4DMA2 | EREKEIS(1)DDEAEEEEK                                          | 1834.8068 |
| B4DMA2 | EIS(1)DDEAEEEEK                                              | 1292.5256 |
| B4DMA2 | IEDVGS(0.5)DEEDDS(0.5)GKDK                                   | 1736.7224 |
| B4DMA2 | IEDVGS(1)DEEDDSGKDKK                                         | 1864.8174 |
| B4DMF3 | SGLS(1)LEELR                                                 | 1002.5346 |
| B4DMS5 | AS(0.921)PS(0.079)LERPEK                                     | 1112.5826 |
| B4DNA8 | KDS(1)AQDDQAK                                                | 1104.5047 |
| B4DNA8 | RKDS(1)AQDDQAK                                               | 1260.6058 |
| B4DNG7 | S(0.964)DT(0.034)S(0.001)ESGAGLTR                            | 1179.5368 |
| B4DNM0 | KYVIS(1)DEEEEDDD                                             | 1584.6315 |
| B4DNS4 | S(0.007)LS(0.96)S(0.032)S(0.001)LDDTEVK                      | 1279.6143 |
| B4DNT8 | KDIS(1)QNKR                                                  | 987.54614 |
| B4DNT8 | GG(1)GSGPTIEEVD                                              | 1203.5255 |
| B4DNW3 | PGPREES(1)EEEEDEDDEEEEEEEKEK                                 | 3049.1803 |
| B4DPW4 | SPGS(1)PVGEGTGSPPK                                           | 1352.6572 |
| B4DQ75 | S(0.101)S(0.899)PPEGKLETK                                    | 1171.6085 |
| B4DQZ7 | GDS(1)DDEKPR                                                 | 1017.4363 |
| B4DQZ7 | T(0.001)TS(0.999)PLEEEER                                     | 1189.5463 |
| B4DQZ7 | T(0.008)T(0.008)S(0.985)PLEEEEREIK                           | 1559.7679 |
| B4DQZ7 | S(1)LS(1)PGVSR                                               | 801.43447 |
| B4DRA2 | LDS(0.144)S(0.848)PS(0.007)VSSTLAAK                          | 1361.7038 |
| B4DRS4 | GSEEDS(1)PKKESK                                              | 1319.6205 |
| B4DSW1 | TIS(1)DGTISASK                                               | 1078.5506 |
| B4DT54 | AKS(0.981)PGLT(0.019)PEPR                                    | 1151.6299 |
| B4DTV0 | DIDIS(0.117)S(0.883)PEFK                                     | 1149.5554 |
| B4DV85 | S(1)PHSKS(1)PAEQR                                            | 1222.6054 |
| B4DV85 | SAS(1)EPSLHR                                                 | 982.48321 |
| B4DVS2 | RPS(0.649)QEQS(0.345)AS(0.004)AS(0.001)S(0.001)GQP<br>QAPLNR | 2195.0679 |
| B4DW31 | TPT(1)PEPAEVETR                                              | 1325.6463 |
| B4DXI0 | RGS(1)DPASGEVEASQLR                                          | 1657.802  |
| B4DXI0 | RGS(1)DPASGEVEASQLRR                                         | 1813.9031 |
| B4DY33 | EGS(1)PIPHDPEFGSK                                            | 1495.6943 |
| B4DZ56 | KGNS(1)PNSEPPTPK                                             | 1351.6732 |
| B4DZC9 | SNS(1)EDKLNSK                                                | 1120.536  |
| B4DZE1 | LDFIES(0.037)DS(0.944)PCS(0.015)S(0.003)EALSJK               | 2011.9408 |

|        |                                                                                                                                   |           |
|--------|-----------------------------------------------------------------------------------------------------------------------------------|-----------|
| B4DZX7 | KVEEQEADEEDVS(1)EEEEASK                                                                                                           | 2437.014  |
| B4DZX7 | S(1)LGPSLATDKS                                                                                                                    | 1074.5557 |
| B4DZZ3 | S(0.001)IS(0.999)ADDDLQESSR                                                                                                       | 1421.627  |
| B4E0B9 | AEDS(1)DS(1)EPEPEDNVR                                                                                                             | 1687.6809 |
| B4E0Y2 | SFS(1)QPGLR                                                                                                                       | 890.46102 |
| B4E0Z3 | ENDIKPLT(0.685)S(0.315)FR                                                                                                         | 1318.6881 |
| B4E0Z3 | KGGS(0.979)T(0.021)S(0.021)S(0.091)S(0.866)PS(0.022)R<br>R                                                                        | 1205.6113 |
| B4E0Z3 | KGGS(0.361)T(0.608)S(0.133)S(0.485)S(0.407)PS(0.007)R<br>R                                                                        | 1205.6113 |
| B4E0Z3 | RS(0.5)AS(0.5)ASHQADIK                                                                                                            | 1269.6426 |
| B4E0Z3 | S(1)AS(0.995)AS(0.005)HQADIK                                                                                                      | 1113.5415 |
| B4E0Z3 | S(1)RS(1)PGRPPK                                                                                                                   | 980.55156 |
| B4E100 | RS(0.334)S(0.664)DT(0.001)S(0.001)GSPATPLK                                                                                        | 1402.7052 |
| B4E100 | S(0.5)S(0.5)DT(0.001)SGSPATPLK                                                                                                    | 1246.6041 |
| B4E105 | S(1)FDGNTLLNR                                                                                                                     | 1135.5622 |
| B4E2F3 | SGST(0.021)ES(0.979)LNPR                                                                                                          | 1046.4993 |
| B4E326 | LDSQEPGRQT(1)PDR                                                                                                                  | 1497.7172 |
| B4E3V2 | LTPVS(0.939)PES(0.022)S(0.031)S(0.007)T(0.001)EEK                                                                                 | 1489.7148 |
| B5B0A5 | KGLVS(0.003)PQS(0.997)PQK                                                                                                         | 1167.6612 |
| B5BU25 | EEHGGLIRS(1)PR                                                                                                                    | 1249.6527 |
| B5BU25 | S(1)DFDEFER                                                                                                                       | 1043.4196 |
| B6RC65 | PARQES(1)WEK                                                                                                                      | 1129.5516 |
| B7Z255 | RNS(0.199)VDT(0.264)AT(0.312)S(0.067)S(0.069)S(0.072)<br>LS(0.054)T(0.053)PS(0.024)EPLS(0.705)PT(0.142)S(0.031)<br>S(0.008)LGEERN | 3105.4698 |
| B7Z3I9 | S(0.5)S(0.5)PAFGDRR                                                                                                               | 991.48354 |
| B7Z556 | CDSSPDS(1)AEDVRK                                                                                                                  | 1464.6151 |
| B7Z5R7 | S(0.001)RS(0.999)DIDVNAAASAK                                                                                                      | 1403.7005 |
| B7Z6N1 | GEGPGEAGGPLT(1)PR                                                                                                                 | 1293.6313 |
| B7Z8E4 | SAS(1)ADNLTLP                                                                                                                     | 1143.5884 |
| B7Z8U8 | DTETVY(0.953)S(0.046)EVR                                                                                                          | 1197.5513 |
| B7Z8U8 | YSRTEGS(0.888)LDGT(0.112)                                                                                                         | 1184.5309 |
| B7Z910 | AGS(1)PS(1)PQPSGELPR                                                                                                              | 1378.6841 |
| B7Z910 | AGSPS(1)PQPSGELPRK                                                                                                                | 1506.7791 |
| B7Z910 | NRAGS(0.5)PS(0.5)PQPSGELPR                                                                                                        | 1648.8281 |
| B7Z959 | S(1)VVS(1)FDKVKEPR                                                                                                                | 1389.7616 |
| B7Z9E9 | LGSQHS(1)PGR                                                                                                                      | 937.47298 |
| B7ZQA8 | CWRVTSSVPLPS(0.001)GS(0.028)T(0.028)S(0.601)S(0.34<br>2)PGR                                                                       | 2117.0324 |
| B7ZQA8 | RS(0.018)DS(0.982)QQAVK                                                                                                           | 1017.5203 |
| B7ZQA8 | RSDSQQAVKS(1)PPLLESPDATR                                                                                                          | 2281.1662 |
| B7ZQA8 | S(1)PPLLESPDATR                                                                                                                   | 1281.6565 |
| B7ZAZ3 | VT(0.001)GELT(1)MT(1)FPAGIVR                                                                                                      | 1590.844  |
| B7ZL14 | TVS(1)DNSLSNSR                                                                                                                    | 1178.5527 |



|        |                                                  |           |
|--------|--------------------------------------------------|-----------|
| B8ZZJ0 | S(1)DQEAKPSTEDLGDKK                              | 1746.8272 |
| B8ZZQ6 | S(1)DAAVDTSSEITTK                                | 1423.6678 |
| B9A053 | ATEIGS(1)PPR                                     | 926.48214 |
| C6KYL4 | NQGS(0.147)S(0.853)LLGR                          | 930.48829 |
| C7C5T8 | S(1)PQPLGGS(1)HR                                 | 1034.5257 |
| C9IZC6 | IVHS(0.5)ES(0.5)QPEK                             | 1152.5775 |
| C9J013 | RGNDPLT(0.042)S(0.254)S(0.704)PGR                | 1255.6269 |
| C9J0A7 | ATIS(1)DEEIER                                    | 1161.5513 |
| C9J0I2 | S(1)AGGDFGNPLR                                   | 1089.5203 |
| C9J3F6 | NISS(0.006)S(0.022)PS(0.969)VES(0.003)LPGGR      | 1485.7423 |
| C9J582 | T(0.001)HS(0.999)EGS(0.001)LLQEPR                | 1352.6684 |
| C9J650 | SVPHFS(1)DEKDPPE                                 | 1500.6369 |
| C9J6K0 | KDS(1)GEDPATCAFQR                                | 1580.6889 |
| C9J8Q2 | RS(0.247)S(0.749)DT(0.005)EEESR                  | 1194.5113 |
| C9JAH2 | TVS(1)EPNLKL                                     | 999.56006 |
| C9JB56 | GDTLAS(1)PNSETGPGKK                              | 1557.7635 |
| C9JB56 | SKDIPLS(1)PPAQK                                  | 1279.7136 |
| C9JC20 | AAPT(0.067)T(0.933)PPPPVK                        | 1074.6073 |
| C9JEY1 | AS(0.451)S(0.546)EGGT(0.004)AAGAGLDSLHK          | 1627.7802 |
| C9JSU1 | RGS(0.956)GDT(0.041)S(0.001)S(0.001)LIDPDTSLSELR | 2105.0237 |
| C9JTC6 | EIDCLS(1)PEAQK                                   | 1288.5969 |
| C9JUY6 | S(1)AELNVPIDPSAPACPEPGHK                         | 2185.0474 |
| C9JW01 | GKAS(1)PFEEDQNRDLK                               | 1732.838  |
| C9JW01 | QAS(1)PTEVVER                                    | 1114.5619 |
| C9JWS9 | ADS(1)DSEDKGEEKPK                                | 1620.7115 |
| C9JX20 | MFPS(1)WPT(1)CLELER                              | 1664.7691 |
| C9JXV0 | STPFIVPS(0.235)S(0.744)PT(0.02)EQEGR             | 1730.8475 |
| C9JZ19 | S(0.005)QT(0.995)DIEREK                          | 1104.5411 |
| D2KTB4 | KGVQQAAS(1)VLVK                                  | 1226.7347 |
| D3DPF9 | DKEIKPS(0.367)S(0.633)K                          | 1030.5659 |
| D3DPF9 | PLKS(0.907)EEPVT(0.093)PK                        | 1223.6762 |
| D3DPZ7 | RLS(0.226)S(0.774)LDDK                           | 932.49271 |
| D3DRH1 | ALS(1)LEENGVGSNFK                                | 1463.7256 |
| D3DRH1 | KCETQLS(0.994)QGS(0.006)                         | 1136.5132 |
| D3DVA5 | SES(1)LESPRGER                                   | 1245.5949 |
| D3DVA5 | QELGS(1)PEER                                     | 1043.4884 |
| D3DVA5 | ANS(1)RDGEAGR                                    | 1031.4744 |
| D3DVD8 | ALS(1)NAANLQR                                    | 1056.5676 |
| D3DVD8 | KES(1)LNEAQK                                     | 1045.5404 |
| D3DWC7 | IT(0.01)RRS(0.997)WS(0.997)S(0.996)R             | 1147.621  |
| D6R904 | EQAEAEVAS(1)LNR                                  | 1315.6368 |
| D6R904 | EQAEAEVAS(1)LNRR                                 | 1471.7379 |
| D6R9V6 | KY(1)IMLEIK                                      | 1036.5991 |

|        |                                                                              |           |
|--------|------------------------------------------------------------------------------|-----------|
| D6RA28 | VAS(0.999)DT(0.001)EEADRTSSK                                                 | 1494.6798 |
| D6RAM3 | AT(0.001)S(0.999)LPSLDTPGELR                                                 | 1455.7569 |
| D6RD83 | NEEDEGHNS(0.029)S(0.971)PR                                                   | 1456.5815 |
| D6RFJ5 | SGPT(1)PPTSENEQK                                                             | 1370.6314 |
| D6W5C0 | RPPS(1)PEPSTK                                                                | 1094.572  |
| D6W5C0 | T(0.119)S(0.147)S(0.718)KES(0.027)S(0.988)PIPS(0.832)P<br>T(0.138)S(0.03)DRK | 1802.901  |
| E5RG76 | T(1)AKEKQAPR                                                                 | 1027.5774 |
| E5RIK5 | MAEKT(0.938)QKS(0.062)VK                                                     | 1148.6223 |
| E5RJ37 | DSLS(1)DDGVDLK                                                               | 1162.5354 |
| E5RJ37 | GKDSLS(1)DDGVDLK                                                             | 1347.6518 |
| E5RKA2 | S(0.5)S(0.5)PLPGKK                                                           | 812.4756  |
| E7EMN6 | YRIQEQES(0.996)S(0.996)GEEDS(0.008)DLSPEEREK                                 | 2739.2107 |
| E7ER77 | RS(1)PGGSGGASR                                                               | 987.4846  |
| E7ETM8 | ESLS(1)PGKLK                                                                 | 957.5495  |
| E7ETM8 | T(0.002)IS(0.998)QEFLTPGK                                                    | 1219.6449 |
| E7ETM8 | EMLAS(1)DDEEDVSSK                                                            | 1553.6403 |
| E7EV03 | KDMQGT(1)EEEEK                                                               | 1193.5234 |
| E7EV54 | GS(0.997)PDGS(0.003)LQTGKPSAPK                                               | 1525.7736 |
| E7EW15 | EGASGRPGS(1)PK                                                               | 1041.5203 |
| E9PB13 | PT(0.536)FT(0.464)KLMDMLEK                                                   | 1452.7357 |
| E9PF10 | AAPQS(0.851)PS(0.149)VPK                                                     | 980.5291  |
| E9PG46 | VGS(0.002)LT(0.998)PPS(0.699)S(0.301)PK                                      | 1068.5815 |
| E9PG46 | VQT(0.016)T(0.984)PPPAVQGQK                                                  | 1349.7303 |
| E9PGC8 | VPS(0.003)APGQES(0.997)PIPPK                                                 | 1517.7726 |
| E9PI52 | EQSEVS(0.006)VS(0.994)PR                                                     | 1116.5411 |
| E9PIE9 | S(1)APPS(1)PPPPGTR                                                           | 1159.5986 |
| E9PIJ1 | QIS(1)QDVKLEPDILLR                                                           | 1765.9938 |
| E9PJA7 | AEGEPQEEES(0.998)PLKS(0.002)K                                                | 1527.7417 |
| E9PK06 | AT(0.001)APQT(0.025)QHVS(0.974)PMR                                           | 1422.7038 |
| E9PKF8 | T(0.128)QT(0.872)PPLGQTPQLGLK                                                | 1577.8777 |
| E9PNJ0 | NAS(1)VPNLR                                                                  | 869.47191 |
| E9PS23 | AS(1)GVAVSDGVK                                                               | 1101.603  |
| E9PSG1 | SQPGQKPAAS(1)PR                                                              | 1222.6418 |
| F5GX80 | SSSHSS(0.001)PGS(0.999)PK                                                    | 1056.4836 |
| F5H3K7 | S(0.355)T(0.645)GGDFGNPLR                                                    | 1119.5309 |
| F5H5B4 | EKENQINS(1)FGK                                                               | 1292.6361 |
| F5H5B4 | ENQINS(1)FGK                                                                 | 1035.4985 |
| F6KPG5 | TCVADES(1)AENC DK                                                            | 1497.5712 |
| F6RFD5 | AS(1)GVQVADEVCR                                                              | 1289.6034 |
| F6RY50 | TEFLHSQNS(0.001)LS(0.999)PR                                                  | 1514.7478 |
| F6RY50 | S(0.582)GS(0.418)DAGEARPPTPASPR                                              | 1651.7914 |
| F6S289 | KNQDVKFT(1)K                                                                 | 1106.6084 |

|        |                                                    |           |
|--------|----------------------------------------------------|-----------|
| F6UYG0 | S(0.003)GS(0.997)GGGSAKEPQEER                      | 1474.6648 |
| F8VR77 | S(0.999)GEDEQQEQT(0.001)IAEDLVVTK                  | 2117.9964 |
| F8VS07 | ET(0.06)PHS(0.94)PGVEDAPIAK                        | 1546.7627 |
| F8W095 | KQS(1)QQLLELESELR                                  | 1699.9105 |
| F8W1E0 | STS(0.999)LGSNLSELDR                               | 1377.6736 |
| F8W1J5 | S(1)RT(1)PDRER                                     | 1015.5159 |
| F8WC91 | EVDEDS(1)EPEREVR                                   | 1587.7013 |
| F8WDB4 | ACAS(0.791)PS(0.205)AQVEGS(0.004)PVAGSDGSQPAV<br>K | 2356.0965 |
| F8WEH2 | S(1)DVEENNFEGR                                     | 1294.5426 |
| F8WF93 | S(0.028)GS(0.972)AAQAEGGLCK                        | 1177.5397 |
| G3V1D0 | RNS(0.976)S(0.02)S(0.001)S(0.001)S(0.001)SPSERPR   | 1532.7291 |
| G3V1T9 | S(0.002)FS(0.994)S(0.004)PENFQR                    | 1197.5415 |
| G3V2C9 | ASNNT(1)ASIAQAR                                    | 1202.6004 |
| G3V2D6 | NDKSEEEQSSS(0.093)S(0.907)VK                       | 1552.6853 |
| G3V2D6 | EAEEGEDDRDS(1)ANGEDDS                              | 1938.6835 |
| G3V4Q5 | RGGG(1)LGQTAR                                      | 1001.5366 |
| G3V5E1 | KPS(1)PQPS(0.058)S(0.942)PR                        | 1079.5724 |
| G3V5F0 | GFS(1)DSGGGPPAK                                    | 1075.4934 |
| H0UI19 | KVS(1)APDILKPLNQEDPK                               | 1891.0415 |
| H0UI78 | APS(1)GAPR                                         | 654.34492 |
| H0Y332 | S(0.079)S(0.1)S(0.821)VT(0.165)S(0.835)IDKESR      | 1294.6365 |
| H0Y555 | ANVS(0.004)S(0.996)PHR                             | 866.43586 |
| H0Y6Z4 | AVT(1)PNQVR                                        | 883.48756 |
| H0Y7V4 | KLYHS(1)QK                                         | 902.4974  |
| H0Y8W3 | LGS(1)PDATR                                        | 815.41373 |
| H0Y8W3 | S(1)LGS(0.99)T(0.01)EGESES RPGK                    | 1519.7114 |
| H0Y8X6 | QIS(1)EETESVDNR                                    | 1405.6321 |
| H0YA82 | KRS(0.57)S(0.738)S(0.692)EDAESLAPR                 | 1531.759  |
| H0YA82 | SS(0.5)S(0.5)EDAESLAPR                             | 1247.563  |
| H0YAD9 | S(1)PPDGQSFR                                       | 989.45666 |
| H0YBC7 | DHS(0.045)S(0.639)QS(0.316)EEEVVEGEKEVEALK         | 2357.087  |
| H0YBF7 | RT(0.603)LS(0.397)DPPSPLPHGPPNK                    | 1808.9533 |
| H0YCR2 | LKS(0.995)EDEL RPEVDEHT(0.005)QK                   | 2052.0124 |
| H0YD16 | SELGNQS(1)PSTSSR                                   | 1348.6219 |
| H0YDZ9 | AS(0.012)S(0.988)PEKAEEDR                          | 1217.5524 |
| H0YE74 | RPNEDS(1)DEDEEK                                    | 1461.5856 |
| H0YE82 | SLGLSLS(1)GGDQEDAGR                                | 1560.738  |
| H0YEF9 | RS(0.219)S(0.703)DGS(0.069)LS(0.009)HEEDLAK        | 1629.7594 |
| H0YEV2 | LPS(0.002)S(0.998)PVYEDAASF                        | 1509.7351 |
| H0YEV2 | LPSSPVY(1)EDAASF                                   | 1509.7351 |
| H0YFI1 | KLLLDPS(0.018)S(0.982)PPTK                         | 1294.7497 |
| H0YFQ2 | DKMVWEILVS(1)ER                                    | 1503.7755 |

|        |                                                                   |           |
|--------|-------------------------------------------------------------------|-----------|
| H0YI08 | GLS(1)WDSGPEEPGPR                                                 | 1482.6739 |
| H0YJ03 | ESLKEEDES(1)DDDNM                                                 | 1654.6152 |
| H0YJ45 | TGDT(1)S(1)RMFRR                                                  | 1225.5986 |
| H0YJB5 | RGS(0.965)S(0.922)PGS(0.112)LEIPK                                 | 1226.6619 |
| H0YJK1 | ALS(0.001)AS(0.999)HTDLAH                                         | 1121.5465 |
| H0YJL4 | T(0.081)S(0.118)S(0.8)PHKEESPK                                    | 1225.5939 |
| H0YKH0 | ESSANNSVS(0.993)PS(0.006)ESLR                                     | 1562.7172 |
| H0YKX5 | ATDAEADVAS(1)LNRR                                                 | 1487.7328 |
| H0YKX5 | ATDAEADVAS(1)LNR                                                  | 1331.6317 |
| H0YLQ7 | QAQAQES(1)EEEEESR                                                 | 1648.6813 |
| H0YN01 | LDEGT(1)PPEPK                                                     | 1081.5292 |
| H3BM18 | EVDAT(0.011)S(0.956)PAPS(0.022)T(0.007)S(0.002)S(0.001)T(0.001)VK | 1575.7628 |
| H3BPE3 | QNPEQS(1)ADEDAEK                                                  | 1459.6063 |
| H3BQF1 | IDYIAGLDS(1)R                                                     | 1121.5717 |
| H3BQZ7 | EEDEPEERS(0.999)GDET(0.001)PGSEVPGDK                              | 2386.9885 |
| H3BQZ7 | SKPAGS(1)DGERR                                                    | 1158.5741 |
| H3BRH3 | RPNT(0.134)S(0.866)PDR                                            | 941.46789 |
| H3BS66 | DGVS(1)LGAVS(0.903)S(0.085)T(0.011)EEASR                          | 1563.7376 |
| H3BSN4 | KRPS(0.998)LPS(0.051)S(0.895)PS(0.056)PGLPK                       | 1546.8831 |
| H3BTK3 | ERS(1)PS(1)PLR                                                    | 940.50903 |
| H3BTK3 | GNVVPS(0.978)PLPT(0.022)RR                                        | 1291.7361 |
| H3BTK3 | SRERS(0.5)PS(0.5)PLR                                              | 1183.6422 |
| H3BUH7 | GILAADES(0.861)T(0.136)GS(0.003)IAK                               | 1331.6933 |
| H3BUH7 | GILAADES(0.999)T(0.001)GSIKR                                      | 1487.7944 |
| H7BXE3 | DDKGSTS(0.128)S(0.72)T(0.128)S(0.023)GS(0.001)SGSS<br>TK          | 1674.718  |
| H7BXM6 | DIKEES(1)DEEEEDDEESGRLR                                           | 2408.0099 |
| H7BXT7 | AQS(1)PGAVEEILDRENK                                               | 1754.8799 |
| H7BZ09 | NRT(1)PSDVK                                                       | 915.47739 |
| H7BZ56 | ASAGRLT(1)PESQSK                                                  | 1330.6841 |
| H7BZZ6 | RS(1)AS(1)PERMD                                                   | 1047.4767 |
| H7C0S1 | LGNIHAMIMY(1)RR                                                   | 1586.8538 |
| H7C0S1 | LGNIHAMIMY(1)RR                                                   | 1586.8538 |
| H7C124 | RHS(0.944)S(0.056)EGGVK                                           | 955.48354 |
| H7C1F9 | RS(0.088)S(0.914)S(0.998)PAELDLK                                  | 1201.6303 |
| H7C1F9 | SSS(1)PAELDLK                                                     | 1045.5292 |
| H7C1F9 | SSS(1)PAELDLKDDLQQTQGK                                            | 2059.0069 |
| H7C1L9 | RS(0.677)ES(0.323)PPAELPSLR                                       | 1565.8526 |
| H7C1L9 | RS(0.999)ES(0.001)PPAELPSLR                                       | 1437.7576 |
| H7C1L9 | S(0.001)ES(0.999)PPAELPSLR                                        | 1281.6565 |
| H7C1M2 | DTEEPLPVKES(0.001)DQT(0.001)LAALLS(0.999)PK                       | 2380.2373 |
| H7C2W5 | KT(0.131)FLPEMS(0.869)EK                                          | 1208.6111 |
| H7C2Y0 | IYHLPDAES(1)DEDEDKFKEQTR                                          | 2436.0717 |

|        |                                                                          |           |
|--------|--------------------------------------------------------------------------|-----------|
| H7C3D5 | QALDS(1)EEEEEDVAAK                                                       | 1661.7268 |
| H7C3F4 | GKVLS(0.358)AKVVT(0.642)NAR                                              | 1341.8092 |
| H7C4V2 | EKDECT(0.972)PT(0.028)RK                                                 | 1262.5925 |
| H7C4W5 | SSS(0.018)VS(0.982)PSASFR                                                | 1110.5306 |
| H7C5D9 | S(0.284)S(0.331)S(0.386)QSGS(0.002)GPS(0.223)S(0.741)<br>PDS(0.034)VLRPR | 1886.9082 |
| H7C5L6 | T(0.01)VS(0.99)AS(0.003)S(0.831)T(0.167)GDLPK                            | 1161.5877 |
| H9KV85 | RHVLS(1)DLEDDEV                                                          | 1581.7747 |
| J3KNR6 | TLS(1)KDDVNYK                                                            | 1181.5928 |
| J3KPF0 | SIS(0.998)GT(0.002)PAETPACK                                              | 1317.6235 |
| J3KRF7 | AAGS(0.993)PS(0.007)PLPAPDPAPK                                           | 1471.7671 |
| J3KS94 | LFS(1)RDAPGREDNTFK                                                       | 1751.8591 |
| J3KS94 | AST(0.006)NS(0.923)ET(0.07)NRGES(0.001)EK                                | 1508.6703 |
| J3KSH8 | NS(0.962)S(0.038)EASSGDFDLK                                              | 1468.6682 |
| J3KSH8 | NS(0.238)S(0.762)EASSGDFDLK                                              | 1468.6682 |
| J3KSH8 | RNS(0.385)S(0.615)EASSGDFDLK                                             | 1624.7693 |
| J3KSN1 | RDS(1)QDGSSYR                                                            | 1169.5061 |
| J3QL44 | SKS(1)NPDFLK                                                             | 1034.5397 |
| J3QL75 | T(0.575)QPFHKY(0.425)MST                                                 | 1238.5754 |
| J3QQK8 | SVIY(1)AIES(1)AVIK                                                       | 1291.7388 |
| J3QQV5 | S(1)GGGVIRGPAGNDCR                                                       | 1585.7379 |
| J3QRP6 | S(1)ADAAAGAPLPR                                                          | 1095.5673 |
| K7EJB8 | GPGGS(1)PGGLQK                                                           | 953.49304 |
| K7EM16 | VS(1)KQEEASGGPTAPK                                                       | 1484.7471 |
| K7EP20 | DTVLS(1)EGNVEQELR                                                        | 1587.774  |
| K7EPU6 | KLS(0.999)LS(0.001)EGKVK                                                 | 1087.6601 |
| K7ES59 | TDS(0.332)S(0.668)PNQAR                                                  | 974.44174 |
| M0QXW7 | VQIS(1)PDSGGLPER                                                         | 1353.6888 |
| M0QZH8 | RAT(1)PEPGDEGEPGR                                                        | 1466.675  |
| M0QZS0 | SLS(1)PILPGR                                                             | 938.55492 |
| M0R1B8 | SQS(1)ADAPGPTER                                                          | 1214.5527 |
| M0R3H9 | T(0.166)RS(0.834)NPEGAEDR                                                | 1230.5589 |
| O14686 | AS(0.036)EPLLS(0.963)PPPFGES(0.001)RK                                    | 1710.8941 |
| O19690 | SDSAQGSQSDVS(1)LTA                                                       | 1236.547  |
| O43306 | DAEPPS(0.977)PT(0.023)PAGPPR                                             | 1387.6732 |
| O60293 | RIS(0.782)T(0.109)S(0.109)DILSEK                                         | 1247.6721 |
| O60307 | S(0.876)S(0.124)ENVLDEEGGRSPR                                            | 1630.7547 |
| O60832 | AGLES(1)GAEPGDGDS(0.739)DT(0.141)T(0.12)K                                | 1705.7279 |
| O60832 | AGLESGAEPGDGDS(0.877)DT(0.061)T(0.061)K                                  | 1705.7279 |
| O94804 | AS(0.001)QS(0.999)RPNS(0.822)S(0.178)ALETLGGEK                           | 1830.9072 |
| O94804 | QVAEQGGDLS(1)PAANR                                                       | 1511.7328 |
| O94874 | DDDS(1)DDESQSSHTGK                                                       | 1621.5976 |
| O95466 | RDS(1)ELGPGVK                                                            | 1056.5564 |

|        |                                             |           |
|--------|---------------------------------------------|-----------|
| O95466 | NKPLEQS(1)VEDLSKGPSSVVK                     | 2235.1747 |
| P05114 | TEES(1)PAS(1)DEAGEKEAK                      | 1676.7377 |
| P05114 | KVS(0.996)S(0.004)AEGAAKEEPK                | 1429.7413 |
| P05114 | VS(0.001)S(0.999)AEGAAKEEPK                 | 1301.6463 |
| P06702 | MHEGDEGPGHHHKPGLGEGT(1)P                    | 2174.9552 |
| P09651 | SES(1)PKEPEQLR                              | 1298.6466 |
| P09651 | S(0.008)KS(0.548)ES(0.444)PKEPEQLR          | 1513.7736 |
| P16401 | S(0.922)ET(0.078)APAETATPAPVEK              | 1597.7835 |
| P16401 | SETAPAETATPAPVEKS(1)PAKK                    | 2109.0954 |
| P16402 | S(0.831)ET(0.169)APLAPTIPAPAEK              | 1591.8457 |
| P16403 | S(0.862)ET(0.138)APAAPAAAPPAEK              | 1477.7413 |
| P21127 | S(1)VEEFQCLNR                               | 1280.5819 |
| P21127 | RDS(1)LEEGELR                               | 1202.5891 |
| P30273 | NQET(0.103)Y(0.869)ET(0.028)LK              | 1124.535  |
| P30273 | SDGVY(1)TGLSTR                              | 1154.5568 |
| P35579 | GAGDGS(1)DEEVDGK                            | 1234.495  |
| P35579 | GAGDGS(1)DEEVDGKADGAEAKPAE                  | 2173.9247 |
| P35579 | KGAGDGS(1)DEEVDGK                           | 1362.5899 |
| P35579 | RQAQQERDELADEIANS(0.5)S(0.5)GK              | 2244.0731 |
| P49006 | AAAT(1)PESQEPQAK                            | 1326.6416 |
| P67936 | AGLNS(1)LEAVK                               | 1000.5553 |
| P67936 | AGLNS(1)LEAVKR                              | 1156.6564 |
| P69905 | VLS(1)PADKTNVK                              | 1170.6608 |
| P80723 | ETPAATEAPS(0.147)S(0.054)T(0.799)PK         | 1385.6674 |
| P80723 | AEGAATEEEGT(1)PK                            | 1288.5783 |
| Q02040 | VVPEDGS(1)PEKR                              | 1211.6146 |
| Q05B97 | SSTGSPTS(1)PLNAEK                           | 1374.6627 |
| Q05CF8 | ETTCSEKES(1)NEELTESCETK                     | 2260.9311 |
| Q05CY8 | VVS(0.916)S(0.075)T(0.009)S(0.001)EEEEAFTEK | 1670.7523 |
| Q05CY8 | VVS(0.007)S(0.381)T(0.554)S(0.057)EEEEAFTEK | 1670.7523 |
| Q05DV5 | TVFS(0.999)PT(0.001)LPAAR                   | 1158.6397 |
| Q08495 | ERS(0.05)LS(0.95)PK                         | 815.45012 |
| Q08495 | GNS(1)LPCVLEQK                              | 1243.6231 |
| Q08495 | HLS(0.999)AEDFS(0.001)R                     | 1060.4938 |
| Q08495 | SS(0.002)S(0.998)LPAYGR                     | 936.46649 |
| Q13131 | SDS(1)DAEAQGK                               | 1006.4203 |
| Q13131 | SGTAT(1)PQR                                 | 816.40898 |
| Q13131 | SIDDEITEAKS(0.837)GT(0.144)AT(0.019)PQR     | 1917.928  |
| Q13233 | AT(0.019)S(0.981)PEAGGGGGALK                | 1171.5833 |
| Q13233 | LSAS(0.986)S(0.014)EDISER                   | 1192.5572 |
| Q13442 | KS(0.247)LDS(0.886)DES(0.866)EDEEDDYQQK     | 2158.8662 |
| Q15172 | SQGS(1)SQFR                                 | 895.41479 |
| Q15454 | HTDDEMT(0.582)GY(0.416)VAT(0.001)R          | 1494.6409 |

|        |                                               |           |
|--------|-----------------------------------------------|-----------|
| Q15651 | AEEAQKT(0.021)ES(0.979)VDNEGE                 | 1634.6908 |
| Q15651 | RKS(1)PENTEGK                                 | 1144.5836 |
| Q15744 | APS(1)PAGPLHK                                 | 973.53451 |
| Q16513 | AS(0.001)S(0.999)LGEIDESSLR                   | 1491.7053 |
| Q1ZYL5 | ETAADVAS(1)LNRR                               | 1430.7114 |
| Q32M78 | HMKT(0.998)PT(0.002)EEK                       | 1099.5332 |
| Q3LGB0 | ISHELDS(0.993)AS(0.006)S(0.001)EVN            | 1386.6263 |
| Q3LGB0 | ISHELDS(0.006)AS(0.994)SEVN                   | 1386.6263 |
| Q3LGB0 | ISHELDS(0.038)AS(0.298)S(0.665)EVN            | 1386.6263 |
| Q3LGB0 | KANDES(1)NEHSDVIDSQELSK                       | 2244.0142 |
| Q3MNE1 | GKS(1)DS(1)EDGEKENEK                          | 1550.6696 |
| Q496C9 | SAS(0.028)S(0.972)GAEGDVS(0.57)S(0.43)EREP    | 1563.6649 |
| Q496C9 | SASSGAEGDVS(0.063)S(0.937)EREP                | 1563.6649 |
| Q4G1C1 | T(0.01)DDVS(0.996)EKT(0.997)S(0.997)LADQEEVR  | 1920.8912 |
| Q4G1C1 | TS(1)LADQEEVR                                 | 1146.5517 |
| Q4KMP7 | AAGGAPS(1)PPPPVR                              | 1172.6302 |
| Q4KMP7 | AAGGAPS(1)PPPPVRR                             | 1328.7313 |
| Q4KMP7 | ALAAGADS(1)PK                                 | 899.47125 |
| Q4LE74 | RT(0.154)S(0.846)FSTSDVSK                     | 1213.5939 |
| Q4LE74 | SKPCGS(1)PR                                   | 887.42834 |
| Q4R1Q4 | AIDS(1)S(1)KKLR                               | 1016.5978 |
| Q4VB24 | SETAPAAPAAPAEKT(1)PVKK                        | 2031.1001 |
| P16401 | GTGAS(0.001)GS(0.999)FK                       | 810.38718 |
| Q4VBX8 | GVAPADS(1)PEAPR                               | 1165.5728 |
| Q52LB7 | RPAS(0.818)PS(0.554)S(0.628)PEHLPATPAESPAQR   | 2282.1404 |
| Q53F35 | KRET(1)DDEGEDD                                | 1307.5113 |
| Q53F35 | RET(1)DDEGEDD                                 | 1179.4164 |
| Q53FL4 | IEEVLSPEGS(0.017)PS(0.278)KS(0.674)PS(0.032)K | 1769.9047 |
| Q53HB8 | Y(0.008)LDVS(0.992)KNMLEK                     | 1338.6853 |
| Q53HU8 | QVQS(0.829)LT(0.171)CEVDALKGTNESLER           | 2376.1591 |
| Q53HU8 | QVQSLTCEVDALKGT(0.609)NES(0.391)LER           | 2376.1591 |
| Q53QN0 | DLDRPES(0.005)QS(0.995)PK                     | 1270.6153 |
| Q53TD0 | RGS(0.954)GS(0.046)QPQEPENK                   | 1412.6644 |
| Q59EF5 | EGRGES(1)ENAGTNQETR                           | 1733.7565 |
| Q59H22 | AS(0.001)S(0.999)LDLNK                        | 846.4447  |
| Q59HB3 | VRES(1)DEETQIK                                | 1332.6521 |
| Q5CZ77 | LIDLES(0.999)PT(0.001)PESQK                   | 1455.7457 |
| Q5H924 | GSGTAS(1)DDEFENLR                             | 1496.6379 |
| Q5H924 | AES(1)PEEVACR                                 | 1146.4975 |
| Q5H924 | AES(1)PEEVACRKEEEER                           | 1946.864  |
| Q5JPT2 | ANS(0.993)PS(0.007)LFGTEGKPK                  | 1431.7358 |
| Q5JPT2 | ETT(0.103)GS(0.897)ES(0.999)DGGDS(0.001)SSTK  | 1543.6122 |
| Q5JSH3 | VGNES(1)PVQELK                                | 1198.6194 |

|        |                                                        |           |
|--------|--------------------------------------------------------|-----------|
| Q5QPM0 | GRLS(1)PVPVPR                                          | 1076.6455 |
| Q5TBN5 | ARGS(1)VSDEEMMELR                                      | 1608.7236 |
| Q5TBN5 | GSVS(1)DEEMMELR                                        | 1381.5854 |
| Q5U071 | GPGRPTGS(1)K                                           | 855.45626 |
| Q5U071 | KGPRPTGS(1)K                                           | 983.55123 |
| Q5VZS7 | DSGRGDS(1)VSDSGSDALR                                   | 1679.7347 |
| Q5VZS7 | GDS(1)VSDSGSDALR                                       | 1264.5531 |
| Q5VZS7 | SGLTVPT(0.017)S(0.983)PK                               | 985.54441 |
| Q5W011 | RPPDPS(1)DEDEDYER                                      | 1736.6762 |
| Q60FE6 | VKES(0.5)IT(0.5)RR                                     | 987.58253 |
| Q66K80 | S(0.001)T(0.001)PMGRALLT(0.998)R                       | 1201.6601 |
| Q69YG1 | GEDVNRT(1)LEGGR                                        | 1301.6324 |
| Q6AWA7 | EINVNMWET(1)LPGR                                       | 1557.761  |
| Q6DKJ0 | S(1)FEEEGEHLGSR                                        | 1375.6004 |
| Q6FHJ5 | KLS(1)PTEPK                                            | 898.51238 |
| Q6FHN3 | NIHGS(0.983)DS(0.017)VK                                | 1068.5564 |
| Q6FI30 | DAEQS(0.513)GS(0.487)PR                                | 945.41519 |
| Q6IB11 | EGEPT(1)VYSDEEPEK                                      | 1736.7265 |
| Q6IB11 | EGEPTVYS(1)DEEPEKDESAR                                 | 2294.9663 |
| Q6IB11 | LLKEGEEPTVYS(1)DEEPEKDESAR                             | 2649.2294 |
| Q6IC76 | HDNEGS(0.916)GS(0.084)KRPK                             | 1310.6327 |
| Q6JBY9 | APGS(0.996)PLS(0.003)SEGAAGEGVR                        | 1540.7481 |
| Q6JBY9 | S(0.997)PS(0.003)RTEKQEEDR                             | 1460.6855 |
| Q6JBY9 | RS(0.891)QS(0.109)DCGELGDFR                            | 1525.658  |
| Q6JBY9 | S(0.035)QS(0.965)DCGELGDFR                             | 1525.658  |
| Q6JBY9 | S(0.5)QS(0.5)DCGELGDFR                                 | 1369.5568 |
| Q6N039 | FGS(1)ADNIPNLK                                         | 1174.5982 |
| Q6NVI1 | AEDGATPS(0.001)PS(0.027)NET(0.971)PKK                  | 1627.7689 |
| Q6NVI1 | AEDGATPS(0.038)NET(0.962)PKKK                          | 1755.8639 |
| Q6P1X2 | AS(0.03)EDNRVPS(0.964)PPPT(0.006)GDDGGGGGR             | 2093.9362 |
| Q6P9G4 | EEKES(1)NHNPS(0.998)DS(0.147)ES(0.855)                 | 1587.6285 |
| Q6PG47 | S(1)HAKELQELLK                                         | 1294.7245 |
| Q6PI41 | PQT(1)MLLGR                                            | 914.50077 |
| Q6PJM5 | RGS(1)IGENQIK                                          | 1100.5938 |
| Q6PJM5 | RGS(1)IGENQIKDEK                                       | 1472.7583 |
| Q6PK00 | ECLS(1)LDPEER                                          | 1246.55   |
| Q6UWX4 | GS(0.017)S(0.983)KKLAS(0.974)PT(0.013)S(0.01)S(0.002)K | 1276.6987 |
| Q70EK8 | SHS(0.982)HT(0.018)GVGK                                | 908.44643 |
| Q75MF5 | S(0.5)S(0.5)PSPGKR                                     | 814.42972 |
| Q75MP3 | HAPHCLS(1)EEEGEQDRPR                                   | 2045.8973 |
| Q75MY8 | ILT(1)KPDLMDR                                          | 1200.6536 |
| Q7KZE5 | LAQIRHIY(1)HS(1)ELEK                                   | 1735.937  |



|        |                                                 |           |
|--------|-------------------------------------------------|-----------|
| Q7RTP6 | LGS(1)PLAVDEALR                                 | 1239.6823 |
| Q7RTS1 | KLS(1)KIET(1)LT(1)LAK                           | 1343.8388 |
| Q7Z3Q8 | QS(0.044)S(0.955)PS(0.002)GSEQLVR               | 1273.6262 |
| Q7Z3Q8 | RES(0.903)CGS(0.073)S(0.024)VLTFEGKDVATK        | 2185.0321 |
| Q7Z5Y0 | SQS(0.997)S(0.003)DTEQQSPTSGGGK                 | 1679.7235 |
| Q7Z637 | SAEAPLY(0.178)S(0.822)K                         | 1093.5292 |
| Q7Z637 | MSRS(1)LDSAR                                    | 1021.4975 |
| Q86U12 | ESEDKPEIEDVGS(1)DEEEEEK                         | 2320.0078 |
| Q86U12 | DKEVS(1)DDEAEEK                                 | 1392.5892 |
| Q86U12 | ERDKES(1)DDEAEEK                                | 1677.733  |
| Q86U86 | AAQQQPS(0.1)AS(0.9)PR                           | 1267.6269 |
| Q86UK0 | DIKT(1)DLHT(1)VRK                               | 1324.7463 |
| Q86VU2 | RGS(1)PAPANPGR                                  | 1078.5632 |
| Q86VX6 | SLDEDEPPPS(0.831)PLT(0.169)R                    | 1551.7417 |
| Q86VX6 | AEPHS(0.987)EDDS(0.013)R                        | 1141.4636 |
| Q86VX6 | VTDCGS(1)PLHR                                   | 1197.5561 |
| Q86WR7 | APS(1)PPVEHPR                                   | 1085.5618 |
| Q86WR7 | S(0.002)RS(0.997)FT(0.001)LDDESLK               | 1396.6834 |
| Q86X09 | ARS(1)LPS(0.609)S(0.391)PER                     | 1098.5782 |
| Q86X09 | ARS(0.999)LPS(0.054)S(0.947)PERR                | 1254.6793 |
| Q86X09 | SLPSS(1)PERR                                    | 1027.5411 |
| Q86X36 | LT(0.5)QIS(0.5)DPEKWEIK                         | 1585.8352 |
| Q86YV0 | DGPPSALGS(1)R                                   | 955.47231 |
| Q86YV0 | DAVQSLQLS(1)PR                                  | 1212.6463 |
| Q8N3K9 | S(1)EAMLAEAHPEIR                                | 1452.7031 |
| Q8N4C8 | S(0.018)QS(0.982)LQDQPTR                        | 1158.5629 |
| Q8N9C4 | TASFS(1)ESRADEVAPAK                             | 1664.8006 |
| Q8N9C4 | T(0.001)AS(0.999)FSESRADEVAPAKK                 | 1792.8955 |
| Q8N9U0 | TNKLPGS(0.981)PGLS(0.019)K                      | 1197.6717 |
| Q8ND56 | S(0.5)S(0.5)PQLDPLRK                            | 1139.6299 |
| Q8ND56 | S(0.165)S(0.835)PQLDPLRK                        | 1139.6299 |
| Q8NFC6 | S(0.187)S(0.813)VDLEESSTK                       | 1180.5459 |
| Q8TC26 | S(0.5)S(0.5)QGTPVPPPPR                          | 1218.6357 |
| Q8TCJ2 | RENPPVEDS(1)S(1)DEDDKR                          | 1886.8242 |
| Q8TF42 | VNS(1)QPGPQK                                    | 953.49304 |
| Q8TF42 | VNS(1)QPGPQKR                                   | 1109.5942 |
| Q92522 | AGGSAALS(0.999)PS(0.001)K                       | 944.49271 |
| Q92835 | KDQES(1)PKMPR                                   | 1214.6078 |
| Q92835 | GES(0.132)PPT(0.868)PPGQPPI(1)PK                | 1584.8148 |
| Q96AF9 | S(1)PGAPGPLTLK                                  | 1036.5917 |
| Q96AF9 | GPPAS(0.639)S(0.361)PAPAPK                      | 1075.5662 |
| Q96AF9 | GPPAS(0.259)S(0.741)PAPAPK                      | 1075.5662 |
| Q96AF9 | GPPAS(0.459)S(0.541)PAPAPKFS(0.958)PVT(0.041)PK | 1831.9832 |

|        |                                                       |           |
|--------|-------------------------------------------------------|-----------|
| Q96DF8 | ELIPQES(1)PR                                          | 1067.5611 |
| Q96DI9 | RVNS(0.782)AS(0.116)S(0.046)S(0.055)NPPAEVDPDTIL<br>K | 2196.1022 |
| Q96DY7 | ES(0.068)RS(0.937)QKHT(0.995)R                        | 1127.5796 |
| Q96I65 | AAS(1)LTEDRDR                                         | 1132.5473 |
| Q96I65 | EAEES(1)DHN                                           | 1058.3789 |
| Q96I65 | RS(0.918)FS(0.082)KEVEER                              | 1265.6364 |
| Q96I65 | S(0.001)FS(0.999)KEVEER                               | 1109.5353 |
| Q96L67 | RGS(0.962)LS(0.038)NAGDPEIVK                          | 1441.7525 |
| Q96PY6 | TCS(1)LPDLSK                                          | 1019.4957 |
| Q96QH2 | HPLS(1)PGFGAAGTPR                                     | 1363.6997 |
| Q96QH2 | TSS(1)EPEFNSLPR                                       | 1362.6416 |
| Q96QH2 | T(0.005)S(0.007)S(0.988)EPEFNS(1)LPR                  | 1362.6416 |
| Q96QH2 | T(0.003)S(0.003)S(0.995)EPEVSVLPK                     | 1271.6609 |
| Q96QR8 | GGGS(0.5)GGGEES(0.5)EGEEVDED                          | 1694.6027 |
| Q96RG5 | KSSEGGVGVGPGGGDEPPT(0.57)S(0.43)PR                    | 2022.9607 |
| Q99698 | LT(0.001)GS(0.999)LGCSIDR                             | 1177.5761 |
| Q99698 | SEDDS(1)PGDESCPR                                      | 1449.5314 |
| Q9BQ02 | KVVVS(1)PTKK                                          | 984.63317 |
| Q9BQ02 | VVVS(0.739)PT(0.261)KK                                | 856.5382  |
| Q9BRF8 | S(1)AAEAGGVFHR                                        | 1100.5363 |
| Q9BSN3 | EPPVS(1)S(1)GPEEAVGK                                  | 1413.6624 |
| Q9BSW2 | S(0.001)QS(0.999)EEEEVFIPR                            | 1634.7424 |
| Q9BT91 | S(0.5)S(0.5)PEQPIGQGR                                 | 1154.568  |
| Q9BVG4 | RADS(1)GEEENTK                                        | 1234.5426 |
| Q9BX95 | RNS(0.91)LT(0.09)GEEQLAR                              | 1429.7274 |
| Q9BXP5 | GDS(1)DDEYDRR                                         | 1226.48   |
| Q9BXP5 | GDS(1)DDEYDRRR                                        | 1382.5811 |
| Q9BXP5 | HEL(1)PPQKR                                           | 1090.5883 |
| Q9C0I1 | QLS(1)LPLTQSK                                         | 1113.6394 |
| Q9H1B4 | RNCMAATLKIT(1)ER                                      | 1562.8021 |
| Q9H1B7 | KAS(1)PEPPDSAEGALK                                    | 1495.7518 |
| Q9H1E3 | EEDEEPES(1)PPEKK                                      | 1541.6733 |
| Q9H1E3 | NSQEDS(1)EDS(1)EDKDVK                                 | 1723.702  |
| Q9H3L7 | STETSDFENIES(1)PLNER                                  | 1966.8756 |
| Q9H7J1 | S(0.008)RS(0.978)PDT(0.015)R                          | 817.40423 |
| Q9H932 | LHEAICS(0.667)S(0.667)T(0.667)KLLK                    | 1498.8177 |
| Q9HA40 | ECRT(0.16)S(0.816)AS(0.024)DVDADNNCLGTEVA             | 2282.938  |
| Q9HA40 | EQHLQS(1)PK                                           | 965.49304 |
| Q9NQX1 | RHMIT(0.138)HS(0.862)EK                               | 1137.5713 |
| Q9NRX5 | S(0.1)DGS(0.9)LEDGDDVHR                               | 1400.5804 |
| Q9NS13 | ET(0.008)EPES(0.992)LEHVR                             | 1324.6259 |
| Q9NS13 | LRS(1)WEQEEEEEEVR                                     | 1846.8333 |

|        |                                                         |           |
|--------|---------------------------------------------------------|-----------|
| Q9NS13 | QDS(0.999)GAGET(0.001)AK                                | 962.4305  |
| Q9NWD4 | GRS(0.927)T(0.336)S(0.737)PKPK                          | 956.54033 |
| Q9NWD4 | SSPS(0.041)GAS(0.646)S(0.313)PR                         | 931.43592 |
| Q9NWI3 | GDSLRT(0.5)S(0.5)GPK                                    | 1073.5465 |
| Q9NXY1 | VT(0.001)PQEEADS(0.999)DVGEEPDSENTPQK                   | 2500.0725 |
| Q9NXY1 | S(0.005)CGET(0.123)FNS(0.767)IT(0.106)KR                | 1398.6562 |
| Q9NYE8 | YSHS(0.001)YLS(0.866)DS(0.099)DT(0.034)EAK              | 1601.6845 |
| Q9NZ63 | VGDTEKPEPERS(1)PPNR                                     | 1806.886  |
| Q9P054 | AQAVS(0.996)EEEEEEEGKS(0.001)S(0.002)S(0.001)PK         | 2048.9022 |
| Q9P134 | LIEDNEY(0.771)T(0.229)AR                                | 1222.583  |
| Q9P266 | GLS(1)APDLR                                             | 827.45012 |
| Q9UIB8 | IY(1)DEILQSK                                            | 1107.5812 |
| Q9UKE5 | T(0.025)T(0.029)S(0.946)IS(1)PALAR                      | 1015.5662 |
| Q9UPR0 | S(1)LEVIPEKANDETGE                                      | 1629.7734 |
| Q9UPU5 | VSDQNS(1)PVLPK                                          | 1182.6245 |
| Q9Y210 | S(0.019)QS(0.981)PAFGPR                                 | 945.46683 |
| Q9Y210 | KLGLGS(0.999)HEDLS(0.001)K                              | 1395.7722 |
| Q9Y210 | LGILGS(0.5)HEDLS(0.5)K                                  | 1267.6772 |
| Q9Y493 | KPT(0.5)VS(0.5)IEK                                      | 900.52803 |
| Q9Y5K6 | S(1)VDFDSLTVR                                           | 1137.5666 |
| S4R2Y4 | RKS(0.971)LS(0.001)DS(0.024)ES(0.004)DDSK               | 1452.6692 |
| S4R2Y4 | S(0.004)LS(0.996)DSESDDSK                               | 1168.4732 |
| S4R2Y4 | S(0.004)LS(0.158)DS(0.831)ES(0.007)DDSKSK               | 1383.6001 |
| S4R418 | ASLGT(0.001)GT(0.014)AS(0.985)PR                        | 1016.5251 |
| S4R418 | SLVIS(1)PPVR                                            | 966.58622 |
| S4R418 | TASEGS(1)EQPK                                           | 1032.4724 |
| S4R418 | TAS(1)EGSEQPKK                                          | 1160.5673 |
| S4R418 | TSLEVS(0.245)PNPEPPEKPVRT(0.754)PEAK                    | 2401.2489 |
| S6G369 | SS(0.007)S(0.993)FGNFDR                                 | 1015.4359 |
| U5XKH1 | REMAS(0.992)PPS(0.418)S(0.385)LS(0.205)GEFLDT(0.002)KDR | 2222.0637 |
| V9GYE3 | S(1)KEQLTPLIK                                           | 1155.6863 |
| V9GZG8 | VLS(1)PADKT                                             | 829.45453 |
| V9H0E3 | S(1)VEPQDAGPLER                                         | 1296.631  |
| V9HVZ0 | ARS(1)VS(1)PPPKR                                        | 1093.6356 |
| V9HW92 | VWS(1)PLVTEEGK                                          | 1243.6449 |
| V9HWC7 | DFT(1)PVCTTELGR                                         | 1394.65   |
| W0S0D3 | QEDGGVY(0.628)S(0.265)S(0.082)S(0.026)GLK               | 1325.6099 |
| X5D7W4 | AAGGDHGS(0.729)PDS(0.271)YR                             | 1288.5432 |
| X6R383 | T(0.88)S(0.913)PLS(0.913)S(0.293)DK                     | 833.41306 |
| X6RJP6 | NFS(1)DNQLQEGK                                          | 1278.584  |

## References

1. Yi, L. H.; Yan, Y. H.; Tang, K. Q.; Ding, C. F., Facile preparation of polymer-grafted ZIF-8-modified magnetic nanospheres for effective identification and capture of phosphorylated and glycosylated peptides. *Anal Methods-Uk* **2020**, *12* (38), 4657-4664.
2. Du, J. L.; Yan, Y. H.; Tang, K. Q.; Ding, C. F., Modified Carbon Nanotubes Decorated with ZIFs as New Immobilized Metal Ion Affinity Chromatography Platform for Enrichment of Phosphopeptides. *Chemistryselect* **2021**, *6* (6), 1313-1319.
3. Sun, N. R.; Deng, C. H.; Li, Y.; Zhang, X. M., Size-Exclusive Magnetic Graphene/Mesoporous Silica Composites with Titanium(IV)-Immobilized Pore Walls for Selective Enrichment of Endogenous Phosphorylated Peptides. *Acs Appl Mater Inter* **2014**, *6* (14), 11799-11804.
4. Su, J.; He, X. W.; Chen, L. X.; Zhang, Y. K., Adenosine Phosphate Functionalized Magnetic Mesoporous Graphene Oxide Nanocomposite for Highly Selective Enrichment of Phosphopeptides. *Acs Sustain Chem Eng* **2018**, *6* (2), 2188-2196.
5. Lin, H.; Deng, C., Development of Hf(4+)-immobilized polydopamine-coated magnetic graphene for highly selective enrichment of phosphopeptides. *Talanta* **2016**, *149*, 91-97.
6. Qi, H.; Li, Z.; Ma, J. T.; Jia, Q., Tailoring a multifunctional magnetic cationic metal-organic framework composite for synchronous enrichment of phosphopeptides/glycopeptides. *J Mater Chem B* **2022**, *10* (18), 3560-3566.
7. Zhu, C.; Wu, J.; Jin, X.; Yan, Y.; Ding, C. F.; Tang, K.; Zhang, D., Post-synthesis of biomimetic chitosan with honeycomb-like structure for sensitive recognition of phosphorylated peptides. *J Chromatogr A* **2021**, *1643*, 462072.
8. Xu, Z. X.; Wu, Y. L.; Wu, H.; Sun, N. R.; Deng, C. H., Hydrophilic polydopamine-derived mesoporous channels for loading Ti(IV) ions for salivary phosphoproteome research. *Anal Chim Acta* **2021**, *1146*, 53-60.
9. Salimi, K.; Usta, D. D.; Celikbicak, O.; Pinar, A.; Salih, B.; Tuncel, A., Ti(IV) carrying polydopamine-coated, monodisperse-porous SiO<sub>2</sub> microspheres with stable magnetic properties for highly selective enrichment of phosphopeptides. *Colloid Surface B* **2017**, *153*, 280-290.
10. Wang, H.; Jiao, F.; Gao, F.; Lv, Y.; Wu, Q.; Zhao, Y.; Shen, Y.; Zhang, Y.; Qian, X., Titanium (IV) ion-modified covalent organic frameworks for specific enrichment of phosphopeptides. *Talanta* **2017**, *166*, 133-140.
11. Yan, S.; Luo, B.; He, J.; Lan, F.; Wu, Y., Phytic acid functionalized magnetic bimetallic metal-organic frameworks for phosphopeptide enrichment. *J Mater Chem B* **2021**, *9* (7), 1811-1820.
12. Wang, B. B.; Liang, W. D.; Liang, H. Z.; Liu, B.; Wang, Q. Y.; Yan, Y. H.; Wang, T. T.; Jiang, Y. F.; Jiang, Y. L.; Qiu, H. D.; Lu, L. H.; Cui, W.; Zhou, Y.; Zhao, L. L.; Yu, H. B., Phosphonate-Functionalized Ionic Liquid: A New Surface Modifier Contributing to the Enhanced Enrichment of Phosphorylated Peptides. *Acs Sustain Chem Eng* **2021**, *9* (23), 7930-7940.
13. Liu, B.; Wang, B.; Yan, Y.; Tang, K.; Ding, C. F., Efficient separation of

phosphopeptides employing a Ti/Nb-functionalized core-shell structure solid-phase extraction nanosphere. *Mikrochim Acta* **2021**, *188* (2), 32.

14. Gao, C. H.; Bai, J.; He, Y. T.; Zheng, Q.; Ma, W. D.; Lei, Z. X.; Zhang, M. Y.; Wu, J.; Fu, F. F.; Lin, Z., Postsynthetic Functionalization of Zr<sup>4+</sup>-Immobilized Core-Shell Structured Magnetic Covalent Organic Frameworks for Selective Enrichment of Phosphopeptides. *Acs Appl Mater Inter* **2019**, *11* (14), 13735-13741.

15. Huang, Y. L.; Wang, J.; Jiang, Y. H.; Yang, P. Y.; Wang, G. W.; Liu, F., Development of amphiphile 4-armed PEO-based Ti(4+) complex for highly selective enrichment of phosphopeptides. *Talanta* **2019**, *204*, 670-676.

16. Yu, L. Z.; Luo, B.; Li, Z. Y.; He, J.; Lan, F.; Wu, Y., PAMAM-PMAA brush-functionalized magnetic composite nanospheres: a smart nanoprobe with tunable selectivity for effective enrichment of mono-, multi-, or global phosphopeptides. *J Mater Chem B* **2020**, *8* (6), 1266-1276.

17. Yao, J. Z.; Sun, N. R.; Wang, J. W.; Xie, Y. Q.; Deng, C. H.; Zhang, X. M., Rapid synthesis of titanium(IV)-immobilized magnetic mesoporous silica nanoparticles for endogenous phosphopeptides enrichment. *Proteomics* **2017**, *17* (8).

18. Zhang, H. Y.; Ou, J. J.; Yao, Y. T.; Wang, H. W.; Liu, Z. S.; Wei, Y. M.; Ye, M. L., Facile Preparation of Titanium(IV)-Immobilized Hierarchically Porous Hybrid Monoliths. *Anal Chem* **2017**, *89* (8), 4655-4662.

19. Wang, J.; Wang, Z.; Sun, N.; Deng, C., Immobilization of titanium dioxide/ions on magnetic microspheres for enhanced recognition and extraction of mono- and multi-phosphopeptides. *Mikrochim Acta* **2019**, *186* (4), 236.

20. Lu, Y.; Liu, B.; Yan, Y.; Tang, K.; Ding, C., "One-step" synthesis of a bifunctional nanocomposite for separation and enrichment of phosphopeptides. *J Chromatogr B Analyt Technol Biomed Life Sci* **2019**, *1130-1131*, 121833.

21. Lin, H. Z.; Deng, C. H., Development of immobilized Sn<sup>4+</sup> affinity chromatography material for highly selective enrichment of phosphopeptides. *Proteomics* **2016**, *16* (21), 2733-2741.

22. Lin, H. Z.; Chen, H. M.; Shao, X.; Deng, C. H., A capillary column packed with azirconium(IV)-based organic framework for enrichment of endogenous phosphopeptides. *Microchim Acta* **2018**, *185* (12).

23. Peng, J.; Zhang, H.; Li, X.; Liu, S.; Zhao, X.; Wu, J.; Kang, X.; Qin, H.; Pan, Z.; Wu, R., Dual-Metal Centered Zirconium-Organic Framework: A Metal-Affinity Probe for Highly Specific Interaction with Phosphopeptides. *ACS Appl Mater Interfaces* **2016**, *8* (51), 35012-35020.

24. Li, J. Y.; Zhang, S.; Gao, W.; Hua, Y.; Lian, H. Z., Guanidyl-Functionalized Magnetic Bimetallic MOF Nanocomposites Developed for Selective Enrichment of Phosphopeptides. *Acs Sustain Chem Eng* **2020**, *8* (44), 16422-16429.
